# Supplementary material for: Fac-to-mer isomerization triggers hydride transfer from Mn(i) complex fac-[(dppm)Mn(CO)3H]
Source: Royal Society of Chemistry journal article supplement (doi:10.1039/d2cc00999d), 2022-01-01
Supplement: d2cc00999d2.pdf [file d2cc00999d2.pdf]

***Fac-to-mer* isomerization triggers hydride transfer from Mn(I) complex  
*fac*-[(Ph<sub>2</sub>PCH<sub>2</sub>PPh<sub>2</sub>)Mn(CO)<sub>3</sub>H]**

Elena S. Osipova,<sup>a†</sup> Ekaterina S. Gulyaeva,<sup>a,b†</sup> Nikolay V. Kireev,<sup>a</sup> Sergey A. Kovalenko,<sup>a</sup> Christian Bijani,<sup>b</sup> Yves Canac,<sup>b</sup> Dmitry A. Valyaev,<sup>\*b</sup> Oleg A. Filippov,<sup>\*a</sup> Natalia V. Belkova<sup>a</sup> and Elena S. Shubina<sup>\*a</sup>

a - A. N. Nesmeyanov Institute of Organoelement Compounds (INEOS), Russian Academy of Sciences, 28 Vavilov str., GSP-1, B-334, Moscow, 119991, Russia

E-mails: [h-bond@ineos.ac.ru](mailto:h-bond@ineos.ac.ru), [shu@ineos.ac.ru](mailto:shu@ineos.ac.ru)

b - LCC-CNRS, Université de Toulouse, CNRS, 205 route de Narbonne 31077 Toulouse, Cedex 4, France.  
E-mail: [dmitry.valyaev@lcc-toulouse.fr](mailto:dmitry.valyaev@lcc-toulouse.fr)

**Electronic Supplementary Information**

## Table of contents

|                                                                                                                                                                                                                                    |     |
|------------------------------------------------------------------------------------------------------------------------------------------------------------------------------------------------------------------------------------|-----|
| General considerations and synthesis of Mn(I) hydride complexes.....                                                                                                                                                               | S3  |
| General procedure for variable temperature IR studies.....                                                                                                                                                                         | S4  |
| Figure S1. IR monitoring of the reaction of <i>fac</i> - <b>1</b> with [Ph <sub>3</sub> C](BAR <sub>4</sub> ) in CH <sub>2</sub> Cl <sub>2</sub> .....                                                                             | S4  |
| Figure S2. IR monitoring of the reaction of <i>fac</i> - <b>1</b> with [Ph <sub>3</sub> C](BAR <sub>4</sub> ) in <i>n</i> BuCl.....                                                                                                | S5  |
| Figure S3. Deconvolution of IR spectrum of <i>fac</i> - <b>1</b> <sup>H</sup> /BAR <sub>3</sub> mixture in CH <sub>2</sub> Cl <sub>2</sub> at 180 K.....                                                                           | S5  |
| Thermodynamic data for hydride transfer between <i>fac</i> - <b>1</b> and BAR <sub>3</sub> from IR study.....                                                                                                                      | S6  |
| Figure S4. Temperature dependence of intensity of ν <sub>CO</sub> bands of <i>fac</i> - <b>1</b> and <i>mer</i> -[ <b>2</b> ](BHar <sub>3</sub> ).....                                                                             | S6  |
| Table S1. Experimental equilibrium constants for <i>fac</i> - <b>1</b> + BAR <sub>3</sub> ↔ [ <i>mer</i> - <b>2</b> ](BHar <sub>3</sub> ) process.....                                                                             | S6  |
| Figure S5. RlnK vs. 1/T plot used for the calculation of ΔH° and ΔS for hydride transfer.....                                                                                                                                      | S6  |
| Determination of kinetic parameters of hydride transfer from <i>fac</i> - <b>1</b> and <i>fac</i> - <b>1</b> -d <sub>3</sub> to BAR <sub>3</sub> .....                                                                             | S7  |
| Table S2. Experimental effective rate constants for the interaction between <i>fac</i> - <b>1</b> and BAR <sub>3</sub> .....                                                                                                       | S7  |
| Figure S6. -ln(k <sub>eff</sub> ħ/(T·k <sub>B</sub> )) vs 1/T plot used for the determination of activation parameters for hydride transfer from <i>fac</i> - <b>1</b> to BAR <sub>3</sub> .....                                   | S8  |
| Figure S7. -ln(k <sub>eff</sub> ħ/(T·k <sub>B</sub> )) vs <i>t</i> plots for the determination of effective rate constants for hydride and deuteride transfer processes at 230K.....                                               | S8  |
| General procedure for variable temperature NMR experiments.....                                                                                                                                                                    | S8  |
| NMR characterization of Mn(I) complexes <i>fac</i> -[ <b>3</b> ] <sup>+</sup> , <i>mer</i> -[ <b>4</b> ] <sup>+</sup> , <i>fac</i> -[ <b>5</b> ] <sup>+</sup> and <i>fac</i> -[ <b>2</b> ] <sup>+</sup> ···HBar <sub>3</sub> ..... | S9  |
| Figures S8-S35. Copies of NMR spectra for all characterized Mn(I) complexes.....                                                                                                                                                   | S11 |
| DFT calculations.....                                                                                                                                                                                                              | S39 |
| Figure S36. Optimized structures of two isomers for Mn(I) hydride [(dppm)Mn(CO) <sub>3</sub> H] ( <b>1</b> ).....                                                                                                                  | S39 |
| Figure S37. Optimized structures of the possible isomers of adducts <b>1</b> ···BAR <sub>3</sub> .....                                                                                                                             | S39 |
| Figure S38. Simulated IR spectra for isomers of hydride complexes <b>1</b> , their adducts with BAR <sub>3</sub> <b>1</b> ···BAR <sub>3</sub> and cationic products [ <b>3</b> ](BHar <sub>3</sub> ).....                          | S40 |
| Figure S39. Optimized structures of non-stabilized [(dppm)Mn(CO) <sub>3</sub> ] <sup>+</sup> cations [ <b>2</b> ] <sup>+</sup> .....                                                                                               | S40 |
| Figure S40. Simulated IR spectra for different isomers of complex [ <b>2</b> ] <sup>+</sup> .....                                                                                                                                  | S41 |
| Figure S41. Optimized structures of complexes [(dppm)Mn(CO) <sub>3</sub> (κ <sup>1</sup> (Cl)-CH <sub>2</sub> Cl <sub>2</sub> )] <sup>+</sup> ([ <b>3</b> ] <sup>+</sup> ).....                                                    | S41 |
| Figure S42. Comparison of simulated IR spectra for cationic complexes [ <b>3</b> ] <sup>+</sup> with coordinated CH <sub>2</sub> Cl <sub>2</sub> molecule vs. their ion pairs [ <b>3</b> ](BHar <sub>3</sub> ).....                | S42 |
| Table S4. Calculated energies for the formation of complexes [ <b>3</b> ] <sup>+</sup> from [ <b>2</b> ] <sup>+</sup> and CH <sub>2</sub> Cl <sub>2</sub> .....                                                                    | S42 |
| Table S1. Calculated ν <sub>CO</sub> band frequencies and intensities for Mn(I) complexes <b>1</b> , [ <b>2</b> ] <sup>+</sup> and [ <b>3</b> ] <sup>+</sup> .....                                                                 | S43 |
| Figure S43. Computed ΔG profiles for the reaction between <i>fac</i> - <b>1</b> and BAR <sub>3</sub> at 298 K and 190 K.....                                                                                                       | S44 |
| References.....                                                                                                                                                                                                                    | S45 |

## General considerations and synthesis of Mn(I) hydride complexes.

All manipulations were performed using standard Schlenk techniques under an atmosphere of dry nitrogen or argon. Dry and oxygen-free organic solvents (toluene, CH<sub>2</sub>Cl<sub>2</sub>) used for synthesis were obtained using LabSolv (Innovative Technology) solvent purification system. Commercially available dry ethanol was degassed by nitrogen bubbling for 10 min and stored under 4 Å molecular sieves. CH<sub>2</sub>Cl<sub>2</sub> and *n*BuCl used for IR spectroscopy studies were stored over CaH<sub>2</sub> and distilled under an argon atmosphere prior to use. Deuterated solvents for NMR were degassed before use by three freeze-pump-thaw cycles and kept over 3 Å molecular sieves. A liquid nitrogen/ethanol or isopropanol slush bath was used to maintain samples at the desired low temperature. Manganese hydride complexes *fac*-[(dppm)Mn(CO)<sub>3</sub>H] (*fac*-1) and *fac*-[(dppmD<sub>2</sub>)Mn(CO)<sub>3</sub>D] (*fac*-1-*d*<sub>3</sub>) were prepared from the corresponding bromide precursor *fac*-[(dppm)Mn(CO)<sub>3</sub>Br]<sup>1</sup> and NaBH<sub>4</sub> using the modified literature procedure.<sup>2</sup> Commercially available B(C<sub>6</sub>F<sub>5</sub>)<sub>3</sub> and [Ph<sub>3</sub>C](B(C<sub>6</sub>F<sub>5</sub>)<sub>4</sub>) were purified by vacuum sublimation and recrystallization from CH<sub>2</sub>Cl<sub>2</sub>/hexane mixture, respectively. All other reagent grade chemicals purchased from commercial sources were used as received.

Routine <sup>1</sup>H, <sup>31</sup>P and <sup>13</sup>C NMR spectra were recorded on Bruker Avance 400 and Avance III HD 400 spectrometers at 400.1, 162.0 and 100.6 MHz, respectively. Low-temperature NMR experiments were carried out using Bruker Avance NEO 600 spectrometer in the 183–303 K temperature range. <sup>1</sup>H and <sup>13</sup>C signals reported in parts per million (ppm) were calibrated against the residual signals of the deuterated solvent,<sup>3</sup> whereas <sup>31</sup>P and <sup>11</sup>B NMR spectra were referenced to 85% H<sub>3</sub>PO<sub>4</sub> and BF<sub>3</sub>·OEt<sub>2</sub>, respectively. When required, signal attribution in <sup>13</sup>C spectra was based on decoupled <sup>13</sup>C{<sup>31</sup>P, <sup>1</sup>H} and <sup>13</sup>C–<sup>1</sup>H HSQC experiments. Variable temperature (160–293 K) IR spectra were recorded on Nicolet 6700 spectrometer using a home-modified cryostat (Carl Zeiss Jena, the accuracy of temperature adjustment ±0.5 K) and 0.05 cm CaF<sub>2</sub> cells.

**Modified procedure for the synthesis *fac*-[(Ph<sub>2</sub>PCH<sub>2</sub>PPh<sub>2</sub>)Mn(CO)<sub>3</sub>H] (*fac*-1).** A solution of (dppm)Mn(CO)<sub>5</sub>Br (1.1 g, 1.82 mmol) and NaBH<sub>4</sub> (345 mg, 9.12 mmol) in EtOH (30 mL) were heated at 80 °C during 1 h until the disappearance of ν<sub>CO</sub> bands of the precursor (ν<sub>CO</sub> 2020 (vs), 1950 (s), 1917 (s) cm<sup>-1</sup>). The resulting suspension was cooled to room temperature and the volatiles were removed under vacuum. The product was extracted with toluene (3×15 mL) and combined extracts were filtered through Celite and evaporated under reduced pressure. The residue was dissolved in CH<sub>2</sub>Cl<sub>2</sub> (10 mL), the solution was again filtered through Celite and hexane (60 mL) was added under stirring. The resulting suspension was concentrated to ca. 30% of the initial volume and the supernatant was removed by decantation. The precipitate was washed with hexane (2×20 mL) and dried under vacuum to afford *fac*-1 (860 mg, 90%) as pale-yellow solid.

*fac*-1: <sup>1</sup>H NMR (400.1 MHz, 298 K, CD<sub>2</sub>Cl<sub>2</sub>): δ 7.70–7.65 (m, 4H, CH<sub>Ar</sub>), 7.59–7.54 (m, 4H, CH<sub>Ar</sub>), 7.43–7.41 (m, 12H, CH<sub>Ar</sub>), 4.42 (dtd, <sup>2</sup>J<sub>HH</sub> = 15.0 Hz, <sup>2</sup>J<sub>PH</sub> = 9.4 Hz, <sup>4</sup>J<sub>HH</sub> = 5.5 Hz, 1H, PCH<sub>2</sub>P), 4.03 (dt, <sup>2</sup>J<sub>HH</sub> = 15.2 Hz, <sup>2</sup>J<sub>PH</sub> = 11.0 Hz, 1H, PCH<sub>2</sub>P), -5.56 (td, <sup>2</sup>J<sub>PH</sub> = 44.0 Hz, <sup>4</sup>J<sub>HH</sub> = 5.5 Hz, 1H, Mn–H). <sup>31</sup>P{<sup>1</sup>H} NMR (162.0 MHz, 298 K, CD<sub>2</sub>Cl<sub>2</sub>): δ 32.6 (br s). IR (CH<sub>2</sub>Cl<sub>2</sub>): ν<sub>CO</sub> 1995, 1915, 1905 cm<sup>-1</sup>. IR (*n*BuCl): ν<sub>CO</sub> 1993, 1911, 1902 cm<sup>-1</sup>. IR (toluene): ν<sub>CO</sub>: 1996, 1916, 1909 cm<sup>-1</sup>.

**Synthesis *fac*-[(Ph<sub>2</sub>PCD<sub>2</sub>PPh<sub>2</sub>)Mn(CO)<sub>3</sub>D] (*fac*-1-*d*<sub>3</sub>).** A solution of (dppm)Mn(CO)<sub>5</sub>Br (60 mg, 0.10 mmol) and NaBH<sub>4</sub> (21 mg, 0.50 mmol) in EtOD (2 mL) was heated at 80 °C during 30 min and then kept overnight at 50 °C. The resulting suspension was cooled to room temperature and the volatiles were removed under vacuum. The product was extracted with toluene (3×5 mL), combined extracts were filtered through Celite and evaporated under reduced pressure. The residue was triturated with pentane (2×2 mL) and dried under vacuum to afford *fac*-1-*d*<sub>3</sub> (31 mg, 59%) as pale-yellow solid. According to <sup>1</sup>H NMR data hydride and PCH<sub>2</sub>P positions had more than 94% of deuterium incorporation.

*fac*-1-*d*<sub>3</sub>: <sup>1</sup>H NMR (400.1 MHz, C<sub>6</sub>D<sub>6</sub>, 298 K): δ 7.71–7.66 (m, 4H, CH<sub>Ar</sub>), 7.46–7.41 (m, 4H, CH<sub>Ar</sub>), 7.03–6.92 (m, 12H, CH<sub>Ar</sub>). <sup>31</sup>P{<sup>1</sup>H} NMR (162.0 MHz, C<sub>6</sub>D<sub>6</sub>, 298 K): δ 34.0 (s). <sup>13</sup>C{<sup>1</sup>H}{<sup>31</sup>P} NMR (100.6 MHz, C<sub>6</sub>D<sub>6</sub>, 298 K): δ 225.1 (br s, Mn–CO), 222.4 (br s, Mn–CO), 138.0, 135.8 (s, C<sub>ipso</sub> PPh<sub>2</sub>), 132.1, 130.3, 130.2, 128.8 (s, CH<sub>Ar</sub>), 48.0 (quint, <sup>1</sup>J<sub>CD</sub> = 21.7 Hz, PCD<sub>2</sub>P). IR (CH<sub>2</sub>Cl<sub>2</sub>): ν<sub>CO</sub> 1993, 1911, 1899 cm<sup>-1</sup>. IR (*n*BuCl): ν<sub>CO</sub> 1995, 1915, 1904 cm<sup>-1</sup>.

## General procedure for variable temperature IR studies.

The solution ( $c = 0.003$  M) of *fac*-[(dppm)Mn(CO)<sub>3</sub>H] (*fac*-1, 1.3 mg) prepared at room temperature in 0.8 mL of the corresponding solvent (CH<sub>2</sub>Cl<sub>2</sub>, *n*BuCl, toluene) was cannulated under an inert atmosphere into the cryostat and cooled to 160 K or 180 K. After the acquisition of reference IR spectrum of initial complex, the solution was removed from the cryostat to the Schlenk tube and cooled to 160 K or 180 K in liquid nitrogen/*i*PrOH or EtOH slush bath. The corresponding Lewis acid ([Ph<sub>3</sub>C](B(C<sub>6</sub>F<sub>5</sub>)<sub>4</sub>): 2.2 mg, 1 equiv.; B(C<sub>6</sub>F<sub>5</sub>)<sub>3</sub>: 1.2-1.8 mg, 1-1.5 equiv.) dissolved in a small amount of solvent (0.05-0.1 mL) was then added at low temperature and the resulting mixture was quickly mixed and returned into the cryostat and monitored by IR spectroscopy in the 160–290 K temperature range.

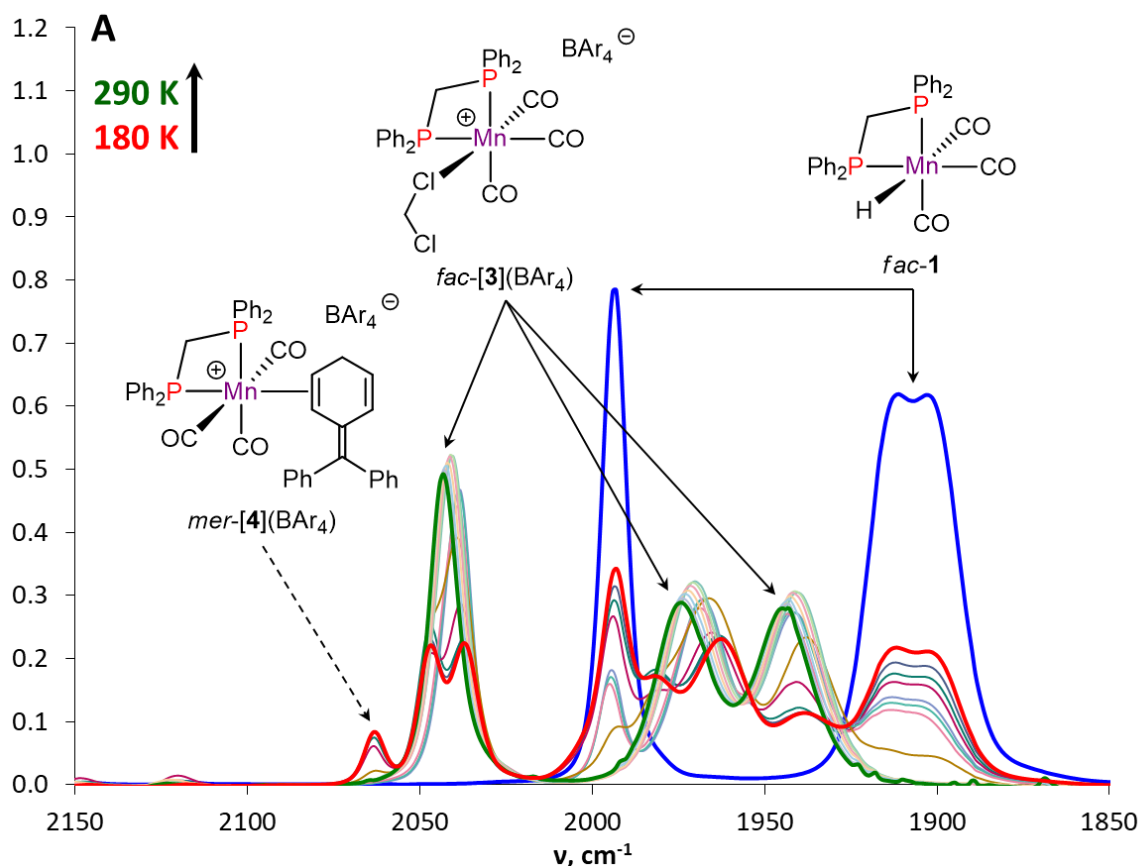

**Figure S1.** IR spectroscopy monitoring of the reaction of complex *fac*-1 with 1 equiv. of [Ph<sub>3</sub>C](BAr<sub>4</sub>), Ar = C<sub>6</sub>F<sub>5</sub> in CH<sub>2</sub>Cl<sub>2</sub> at 180-300 K temperature range ( $c = 0.003$  M,  $l = 0.05$  cm).

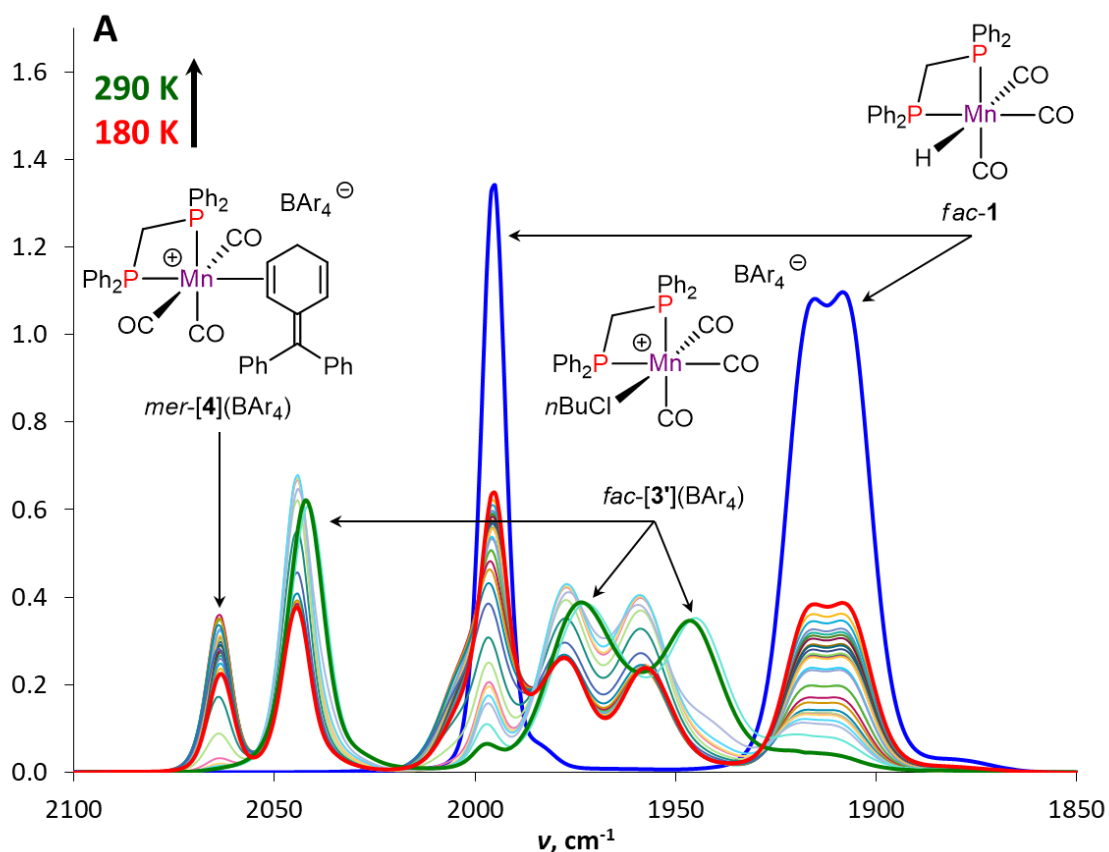

**Figure S2.** IR spectroscopy monitoring of the reaction of complex *fac*-1 with 1 equiv. of [Ph<sub>3</sub>C](BAR<sub>4</sub>) (Ar = C<sub>6</sub>F<sub>5</sub>) in *n*BuCl at 160–300 K temperature range (*c* = 0.004 M, *l* = 0.05 cm).

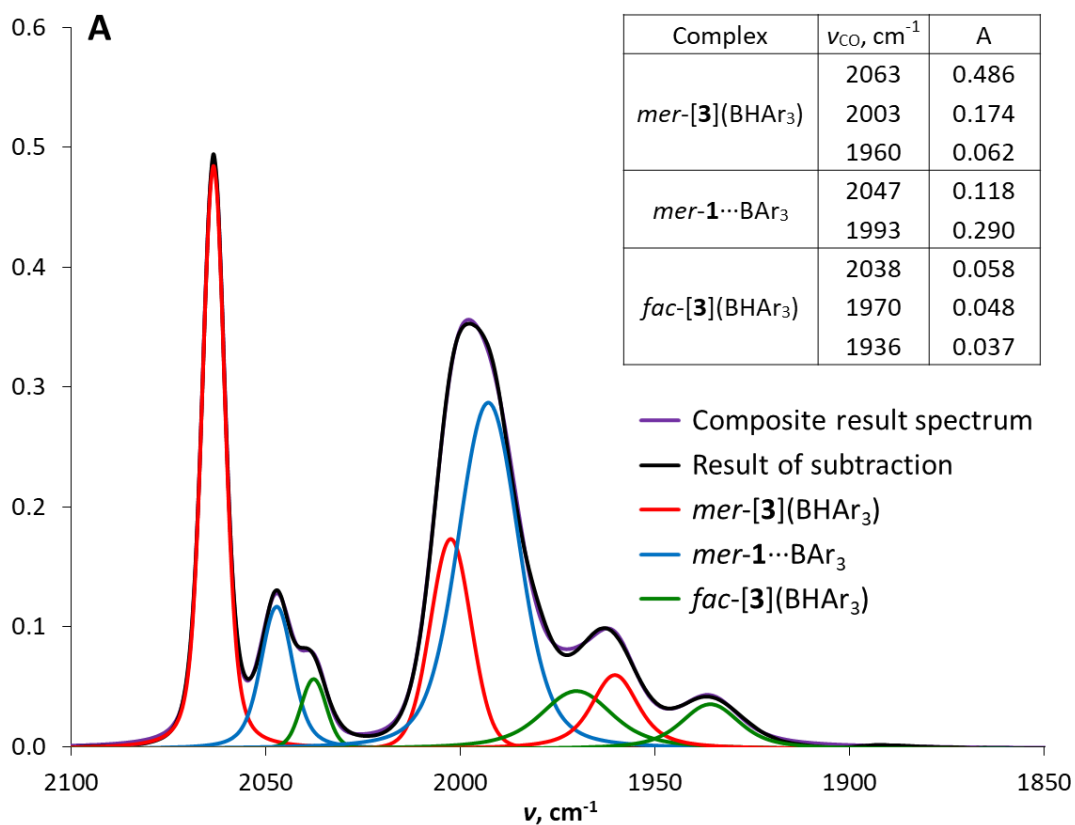

**Figure S3.** IR spectrum of the mixture of *fac*-1 with 1.5 equiv. of BAR<sub>3</sub> (Ar = C<sub>6</sub>F<sub>5</sub>) in CH<sub>2</sub>Cl<sub>2</sub> at 180 K with the mathematical subtraction of the initial hydride spectrum and its peak deconvolution.

## Determination of thermodynamic characteristics of hydride transfer from *fac*-1 to B(C<sub>6</sub>F<sub>5</sub>)<sub>3</sub> using low temperature IR studies.

For the reaction of *fac*-1 with 1.3 equiv. of B(C<sub>6</sub>F<sub>5</sub>)<sub>3</sub> in toluene experimental equilibrium constants were obtained by IR spectroscopy at 210-240 K range (Figure S4, Table S1). Every temperature point was kept for 20 minutes. Thermodynamic parameters of hydride transfer ( $\Delta H^\circ = -3.3$  kcal/mol,  $\Delta S^\circ = 5.5$  cal/(mol·K)) were obtained by Van't-Hoff method from the  $R\ln K_p - 1/T$  dependency (Figure S5) according to the formula:

$$\Delta H/T - \Delta S = -R \cdot \ln K_p$$

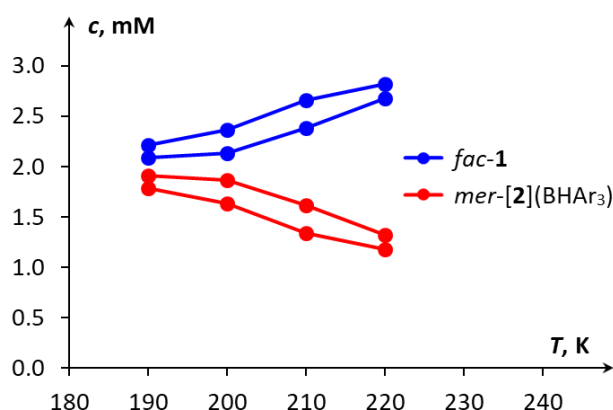

**Figure S4.** Temperature dependence of intensity of  $\nu_{CO}$  bands of *fac*-1 and *mer*-[2](BAr<sub>3</sub>) (Ar = C<sub>6</sub>F<sub>5</sub>). Experimental conditions: *fac*-1 ( $c = 0.004$  M), B(C<sub>6</sub>F<sub>5</sub>)<sub>3</sub> ( $c = 0.005$  M), toluene, 190-220 K,  $l = 0.05$  cm.

**Table S1.** Experimental equilibrium constants for *fac*-1 + B(C<sub>6</sub>F<sub>5</sub>)<sub>3</sub>  $\leftrightarrow$  *mer*-[2](BH(C<sub>6</sub>F<sub>5</sub>)<sub>3</sub>) process obtained from low temperature IR spectroscopy data.

| $T$ | $1/T$  | $c(\text{mer-[2]}^+)$ | $c(\text{fac-1})$ | $c(\text{B(C}_6\text{F}_5)_3)$ | $K$ | $R\ln K$ |
|-----|--------|-----------------------|-------------------|--------------------------------|-----|----------|
| 190 | 0.0053 | 0.0023                | 0.0017            | 0.0033                         | 388 | 11.8     |
| 200 | 0.0050 | 0.0019                | 0.0021            | 0.0037                         | 233 | 10.8     |
| 210 | 0.0048 | 0.0016                | 0.0024            | 0.0040                         | 170 | 10.2     |
| 220 | 0.0045 | 0.0013                | 0.0027            | 0.0043                         | 116 | 9.4      |

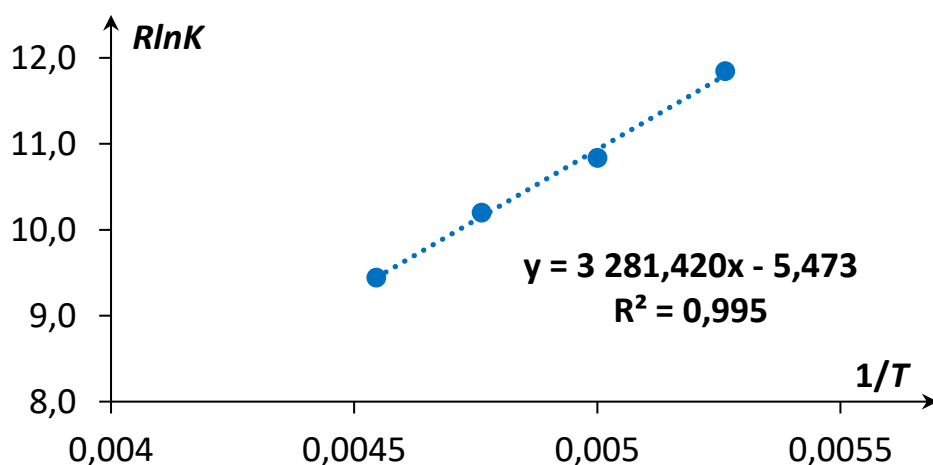

**Figure S5.**  $R\ln K$  vs.  $1/T$  plot for determination of thermodynamic parameters for hydride transfer.

## Determination of kinetic parameters of hydride transfer from *fac-1* and *fac-1-d<sub>3</sub>* to B(C<sub>6</sub>F<sub>5</sub>)<sub>3</sub> using low temperature IR studies

The interaction between *fac*-[(dppm)Mn(CO)<sub>3</sub>H] (*fac-1*) and BAr<sub>3</sub> (Ar = C<sub>6</sub>F<sub>5</sub>) as a Lewis acid could be described as the second order reaction with two pre-equilibria (*K*<sub>1</sub> and *K*<sub>2</sub>, see below), since the formation of *mer*-[(dppm)Mn(CO)<sub>3</sub>(κ<sup>1</sup>(Cl)-*n*BuCl)](BAr<sub>4</sub>) (*mer*-[**3'**]<sup>+</sup>) is reversible at low temperatures, and warming from 160 K to 190 K shifts this equilibrium to the formation of initial manganese hydride *fac-1*. At the same time, the *mer*-to-*fac* isomerization of *mer*-[**3'**]<sup>+</sup> is almost irreversible due to much higher stability of *fac*-[(dppm)Mn(CO)<sub>3</sub>(κ<sup>1</sup>(Cl)-*n*BuCl)](BAr<sub>4</sub>) (*fac*-[**3'**]<sup>+</sup>). Excluding the process of *fac*-to-*mer* isomerization for starting hydrides **1** and hydrogen bonded adducts **1**⋯BAr<sub>3</sub>, the mechanism could be simplified to following scheme with appropriate kinetic equations. Taking into account that the rate-determining step is *mer*-[**3'**]<sup>+</sup> → *fac*-[**3'**]<sup>+</sup> isomerization, the overall process rate will be  $r = k[\textit{mer}\text{-}[\mathbf{3}']^+]$ , where concentration of *mer*-[**3'**]<sup>+</sup> could be expressed like  $\textit{mer}\text{-}[\mathbf{3}']^+ = K_1 K_2 [\mathbf{1}] [\text{BAr}_3]$ . The reaction rate in this case will be  $r = k_{\text{eff}}[\mathbf{1}^H] [\text{BAr}_3]$ , in which  $k_{\text{eff}} = K_1 K_2 k$ .

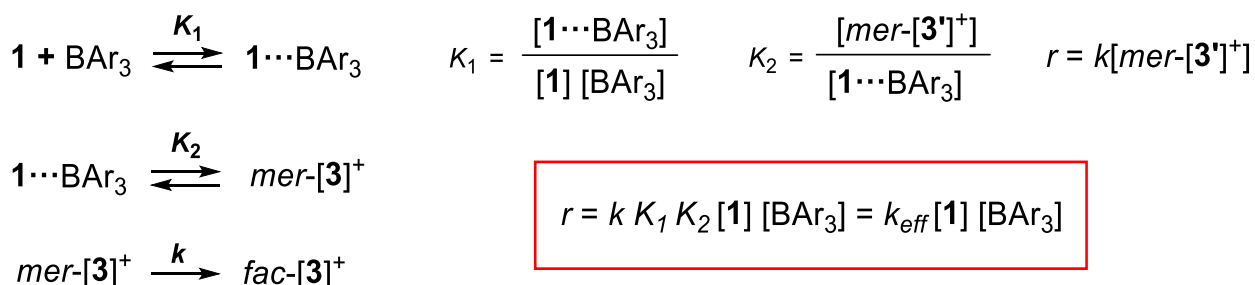

Experimental effective rate constants for the reaction of *fac-1* with 1.2 equiv. of BAr<sub>3</sub> (Table S2) were obtained in *n*BuCl at 220-250 K temperature range with integrated rate equation for second order reaction when initial reagents concentrations are not equal:

$$kt = \frac{\mathbf{1}}{[\mathbf{1}]_0 [\text{BAr}_3]_0} \ln \frac{[\text{BAr}_3]_0 [\mathbf{1}]}{[\mathbf{1}]_0 [\text{BAr}_3]}$$

Then the corresponding activation parameters (Figure S6) were calculated with Eyring's equation for bimolecular reaction in solution (see below). Analysis of the experimental data for *fac-1* and *fac-1-d<sub>3</sub>* under the same conditions at 230 K (Figure S7) revealed the negligible kinetic isotopic effect ( $k_H/k_D = 0.9 \pm 0.1$ ).

$$k_{\text{eff}} = \frac{k_B T}{h} e^{-\frac{\Delta H}{RT} + \frac{\Delta S}{T}}$$

**Table S2.** Experimentally determined effective rate constants for the interaction between *fac-1* and 1.2 equiv. of BAr<sub>3</sub> in *n*BuCl at 220-250 K range.

|              | $k_{\text{eff}} = K_1 K_2 k, \text{ s} \cdot \text{M}^{-1}$  |
|--------------|--------------------------------------------------------------|
| <i>T</i> , K | <i>fac-1</i> /B(C <sub>6</sub> F <sub>5</sub> ) <sub>3</sub> |
| 220          | $2.4 \cdot 10^{-3}$                                          |
| 230          | $6.9 \cdot 10^{-3}$                                          |
| 240          | $1.9 \cdot 10^{-2}$                                          |
| 250          | $4.4 \cdot 10^{-2}$                                          |

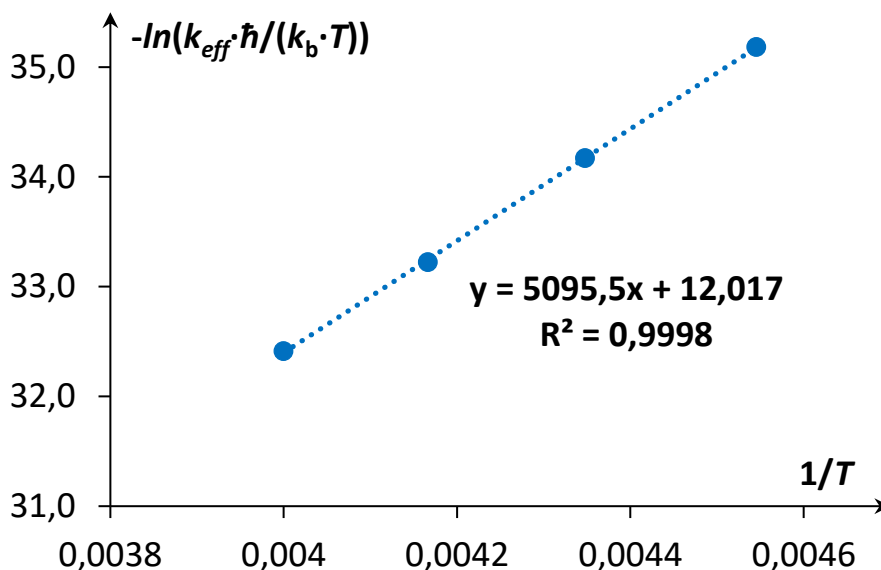

**Figure S6.**  $-\ln(k_{eff} \cdot \hbar / (T \cdot k_B))$  vs  $1/T$  plot used for the determination of activation parameters for hydride transfer.

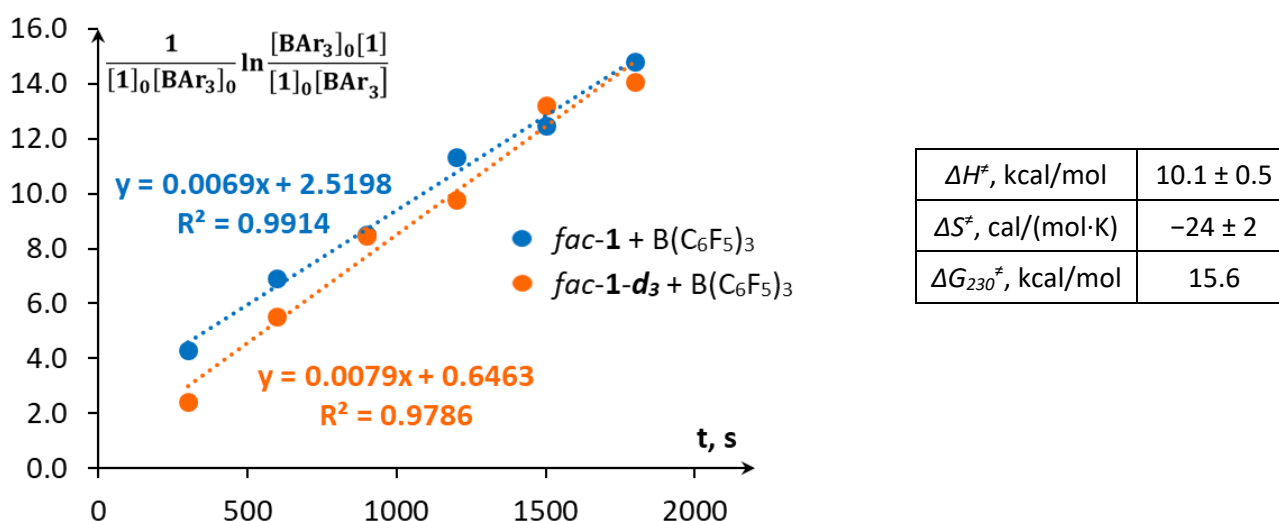

**Figure S7.**  $-\ln(k_{eff} \cdot \hbar / (T \cdot k_B))$  vs  $t$  plots for the determination of effective rate constants of for hydride (*fac-1* +  $B(C_6F_5)_3$ , blue) and deuteride (*fac-1-d<sub>3</sub>* +  $B(C_6F_5)_3$ , orange) transfer processes at 230K.

### General procedure for variable temperature NMR experiments

A solution of *fac*-[(dppm)Mn(CO)<sub>3</sub>H] (*fac-1*) (20 mg, 0.04 mmol) in CD<sub>2</sub>Cl<sub>2</sub> (0.2 mL) was filtered through Celite directly into the NMR tube and the filter pad was washed with additional amount of solvent (0.1 mL). The resulting solution was frozen in a liquid nitrogen and the solution of corresponding Lewis acid ([Ph<sub>3</sub>C](B(C<sub>6</sub>F<sub>5</sub>)<sub>4</sub>): 36.9 mg, 1 equiv.; B(C<sub>6</sub>F<sub>5</sub>)<sub>3</sub>: 20 mg, 1 equiv.) in CD<sub>2</sub>Cl<sub>2</sub> (0.2 mL) was carefully added on the wall of frozen NMR tube. Two frozen solutions were simultaneously melted and mixed in slush liquid nitrogen/EtOH bath at ca. 180 K and the resulting NMR sample was inserted into pre-cooled NMR probe at 183 K and then monitored with multi-nuclear NMR spectroscopy in 183-273 K temperature range.



## NMR spectroscopy characterization of Mn(I) cationic complexes *fac*-[3](BAr<sub>4</sub>), *mer*-[4](BAr<sub>4</sub>), *fac*-[5](BAr<sub>4</sub>) and *fac*-[2](HBAr<sub>3</sub>).

### Spectroscopic characterization of complex *fac*-[3](B(C<sub>6</sub>F<sub>5</sub>)<sub>4</sub>).

The most pertinent NMR spectra for this compound are shown in Figures S13-S15. Based on <sup>1</sup>H and <sup>31</sup>P NMR data complex *fac*-[3](B(C<sub>6</sub>F<sub>5</sub>)<sub>4</sub>) exists in solution as a mixture of two isomers in *ca.* 4:1 ratio at room temperature attributed to *fac,anti*- (**A**, major) and *fac,syn*- (**B**, minor) forms according to the results of DFT calculations (see page S41). The equivalent amount of Ph<sub>3</sub>CH was also observed in <sup>1</sup>H and <sup>13</sup>C spectra, but their signals in <sup>1</sup>H and <sup>13</sup>C spectra are not listed.

#### *fac*-[3](B(C<sub>6</sub>F<sub>5</sub>)<sub>4</sub>):

<sup>1</sup>H NMR (600.1 MHz, CD<sub>2</sub>Cl<sub>2</sub>, 298 K) δ 7.47-7.08 (m, 20H, CH<sub>Ar</sub>, **A+B**), 5.05 (dt overlapped with another dt, <sup>2</sup>J<sub>HH</sub> = 16.3 Hz, <sup>2</sup>J<sub>PH</sub> = 11.7 Hz, 0.2H, PCH<sub>2</sub>P, **B**), 5.03 (dt overlapped with another dt, <sup>2</sup>J<sub>HH</sub> = 16.4 Hz, <sup>2</sup>J<sub>PH</sub> = 11.5 Hz, 0.8H, PCH<sub>2</sub>P, **A**), 4.78 (dt, <sup>2</sup>J<sub>HH</sub> = 16.4 Hz, <sup>2</sup>J<sub>PH</sub> = 11.5 Hz, 0.8H, PCH<sub>2</sub>P, **A**), 4.66 (dt, <sup>2</sup>J<sub>HH</sub> = 16.3 Hz, <sup>2</sup>J<sub>PH</sub> = 11.7 Hz, 0.2H, PCH<sub>2</sub>P, **B**).

<sup>1</sup>H{<sup>31</sup>P} NMR (600.1 MHz, CD<sub>2</sub>Cl<sub>2</sub>, 298 K) δ 7.08-7.47 (m, CH<sub>Ar</sub>, **A+B**), 5.05 (d overlapped with another d, <sup>2</sup>J<sub>HH</sub> = 16.2 Hz, PCH<sub>2</sub>P, **B**), 5.03 (d overlapped with another d, <sup>2</sup>J<sub>HH</sub> = 16.3 Hz, PCH<sub>2</sub>P, **A**), 4.78 (d, <sup>2</sup>J<sub>HH</sub> = 16.3 Hz, PCH<sub>2</sub>P, **A**), 4.66 (d, <sup>2</sup>J<sub>HH</sub> = 16.2 Hz, PCH<sub>2</sub>P, **B**).

<sup>31</sup>P{<sup>1</sup>H} NMR (243.0 MHz, CD<sub>2</sub>Cl<sub>2</sub>, 298 K): δ 13.8 (s, **B**), 10.0 (s, **A**).

<sup>13</sup>C{<sup>1</sup>H} NMR (150.9 MHz, 243 K, CD<sub>2</sub>Cl<sub>2</sub>): 219.7 (t, <sup>2</sup>J<sub>PC</sub> = 18.8 Hz, Mn-CO, **A**), 215.2 (br s, Mn-CO, **B**), 214.8 (br s, Mn-CO, **A**), 147.9 (br d, <sup>1</sup>J<sub>BF</sub> = 239.5 Hz, C<sub>ortho</sub> B(C<sub>6</sub>F<sub>5</sub>)<sub>4</sub>), 138.1 (br dt, <sup>1</sup>J<sub>BF</sub> = 239.5 Hz, <sup>2</sup>J<sub>BF</sub> = 11.5 Hz, C<sub>para</sub> B(C<sub>6</sub>F<sub>5</sub>)<sub>4</sub>), 136.2 (br d, <sup>1</sup>J<sub>BF</sub> = 245.7 Hz, C<sub>meta</sub> B(C<sub>6</sub>F<sub>5</sub>)<sub>4</sub>), 133.0, 132.9 (s, CH<sub>PPH<sub>2</sub></sub>, **B**), 132.7, 132.5 (s, CH<sub>PPH<sub>2</sub></sub>, **A**), 131.5 (vt, J<sub>PC</sub> = 5.9 Hz, CH<sub>PPH<sub>2</sub></sub>, **B**), 131.3 (vt, J<sub>PC</sub> = 5.6 Hz, CH<sub>PPH<sub>2</sub></sub>, **A**), 131.0 (vt, J<sub>PC</sub> = 5.3 Hz, CH<sub>PPH<sub>2</sub></sub>, **A**), 130.9 (vt, J<sub>PC</sub> = 5.8 Hz, CH<sub>PPH<sub>2</sub></sub>, **B**), 130.6 (vt, J<sub>PC</sub> = 4.9 Hz, CH<sub>PPH<sub>2</sub></sub>, **B**), 130.4 (vt, J<sub>PC</sub> = 5.7 Hz, CH<sub>PPH<sub>2</sub></sub>, **B**), 130.3 (vt, J<sub>PC</sub> = 5.2 Hz, CH<sub>PPH<sub>2</sub></sub>, **A**), 130.1 (vt, J<sub>PC</sub> = 5.3 Hz, CH<sub>PPH<sub>2</sub></sub>, **A**), 129.6 (vt, J<sub>PC</sub> = 25.2 Hz, C<sub>ipso-PPH<sub>2</sub></sub>, **A**), 127.2 (vt, J<sub>PC</sub> = 19.4 Hz, C<sub>ipso-PPH<sub>2</sub></sub>, **A**), 123.6 (br m, C<sub>ipso</sub> B(C<sub>6</sub>F<sub>5</sub>)<sub>4</sub>), 63.0 (br m, Mn-CD<sub>2</sub>Cl<sub>2</sub>, **A+B**), 39.7 (t, <sup>1</sup>J<sub>PC</sub> = 24.3 Hz, PCH<sub>2</sub>P, **A+B**).

IR (CH<sub>2</sub>Cl<sub>2</sub>, 290 K): ν<sub>CO</sub> 2037, 1968, 1946 cm<sup>-1</sup>; IR (nBuCl, 290 K): ν<sub>CO</sub> 2040, 1970, 1943 cm<sup>-1</sup>; IR (toluene, 290 K): ν<sub>CO</sub> 2037, 1967, 1942 cm<sup>-1</sup>.

### Characterization of complex *mer*-[4](B(C<sub>6</sub>F<sub>5</sub>)<sub>4</sub>) observed by low-temperature NMR monitoring of the reaction between *fac*-1 and [Ph<sub>3</sub>C](B(C<sub>6</sub>F<sub>5</sub>)<sub>4</sub>).

The approximate ratio between *mer*-[4](B(C<sub>6</sub>F<sub>5</sub>)<sub>4</sub>), *fac,anti*-[3](B(C<sub>6</sub>F<sub>5</sub>)<sub>4</sub>) and Ph<sub>3</sub>CH in the reaction mixture at 183 K was determined by the integration for well-separated signals at δ<sub>H</sub> 5.78, 4.74 and 5.58 ppm, respectively (Figure S18). A quantitative <sup>1</sup>H NMR yield of two latter products was observed at 223 K using the signal of residual solvent protons as an internal standard (Figure S18, inset). The existence of CH=CHCH<sub>2</sub>CH=CH structural motif in the molecule of *mer*-[4](B(C<sub>6</sub>F<sub>5</sub>)<sub>4</sub>) was unambiguously confirmed by <sup>1</sup>H TOCSY NMR spectrum (Figure S20) and their exact attribution was inferred using <sup>1</sup>H-<sup>1</sup>H COSY (Figure S19) and <sup>1</sup>H-<sup>13</sup>C HSQC (Figure S23) spectra. Based on the general trends known in the literature, it was proposed that more upfield CH resonances observed at δ<sub>H</sub>/δ<sub>C</sub> 5.78/107.4 and 4.41/88.5 ppm belong to the CH=CH moiety coordinated to the manganese atom (Figures S22-23), whereas non-coordinated CH=CH 1,4-cyclohexadiene fragment was attributed to the signals at δ<sub>H</sub>/δ<sub>C</sub> 6.44/126.5 and 5.51/127.7 ppm. Upon warming a fast transformation of *mer*-[4](B(C<sub>6</sub>F<sub>5</sub>)<sub>4</sub>) into *fac*-[3](B(C<sub>6</sub>F<sub>5</sub>)<sub>4</sub>) was observed by <sup>1</sup>H and <sup>31</sup>P NMR spectroscopy (Figure S24-S25) together with a detection of non-coordinated cyclic diene **5** isomerizing into triphenylmethane.

#### *mer*-[4](B(C<sub>6</sub>F<sub>5</sub>)<sub>4</sub>):

<sup>1</sup>H NMR (600.1 MHz, CD<sub>2</sub>Cl<sub>2</sub>, 183 K): δ 7.72 (br dd, J<sub>PH</sub> = 12.2, <sup>3</sup>J<sub>HH</sub> = 7.3 Hz, 2H, CH<sub>PPH<sub>2</sub></sub>), 7.67-7.28 (m, overlapped with signals of *fac*-[3](B(C<sub>6</sub>F<sub>5</sub>)<sub>4</sub>), 24H, CH<sub>PPH<sub>2</sub></sub>+CH<sub>Ph</sub>), 6.98 (d, <sup>3</sup>J<sub>HH</sub> = 7.3 Hz, 2H, CH<sub>Ph</sub>), 6.87 (br dd, J<sub>PH</sub> = 11.4, <sup>3</sup>J<sub>HH</sub> = 7.5 Hz, 2H, CH<sub>PPH<sub>2</sub></sub>), 6.44 (d, <sup>3</sup>J<sub>HH</sub> = 10.5 Hz, 1H, CH<sub>2</sub>CH=CH), 5.78 (br d, <sup>3</sup>J<sub>HH</sub> = 8.5 Hz, 1H,

CH<sub>2</sub>CH=CH...Mn), 5.51 (br d, <sup>3</sup>J<sub>HH</sub> = 10.8 Hz, 1H, CH<sub>2</sub>CH=CH), 5.05 (dt, <sup>2</sup>J<sub>HH</sub> = 18.0 Hz, <sup>2</sup>J<sub>PH</sub> = 9.3 Hz, 1H, PCH<sub>2</sub>P), 4.53-4.40 (m overlapped with singlet, 2H, PCH<sub>2</sub>P+CH<sub>2</sub>CH=CH...Mn), 2.23 (d, <sup>2</sup>J<sub>HH</sub> = 25.7 Hz, 1H, CH<sub>2</sub>), 2.06 (d, <sup>3</sup>J<sub>HH</sub> = 25.7 Hz, 1H, CH<sub>2</sub>(CH=CH)<sub>2</sub>).

<sup>31</sup>P{<sup>1</sup>H} NMR (243.0 MHz, 183 K, CD<sub>2</sub>Cl<sub>2</sub>): δ 10.6 (d, <sup>2</sup>J<sub>PP</sub> = 44.4 Hz), 7.10 (d, <sup>2</sup>J<sub>PP</sub> = 44.3 Hz).

<sup>13</sup>C{<sup>1</sup>H} NMR (150.9 MHz, CD<sub>2</sub>Cl<sub>2</sub>, 183 K): δ 218.9 (br s, Mn-CO), 218.1 (br s, Mn-CO), 213.6 (br s, Mn-CO), 147.9 (br d, <sup>1</sup>J<sub>BF</sub> = 238.5 Hz, *Cortho* B(C<sub>6</sub>F<sub>5</sub>)<sub>4</sub>), 140.2, 139.3 (s, *Cipso-Ph<sub>2</sub>C=C*), 138.1 (br dt, <sup>1</sup>J<sub>BF</sub> = 239.0 Hz, <sup>2</sup>J<sub>BF</sub> = 11.5 Hz, *Cpara* B(C<sub>6</sub>F<sub>5</sub>)<sub>4</sub>), 136.2 (br d, <sup>1</sup>J<sub>BF</sub> = 245.7 Hz, *Cmeta* B(C<sub>6</sub>F<sub>5</sub>)<sub>4</sub>), 132.5-129.0 (numerous CH<sub>Ph</sub> signals overlapping with those of *fac*-[**3**](B(C<sub>6</sub>F<sub>5</sub>)<sub>4</sub>), 127.7 (s, CH<sub>2</sub>CH=CH), 126.5 (s, CH<sub>2</sub>CH=CH), 126.3 (vt, *J*<sub>PC</sub> = 19.0 Hz, *Cipso-PPh<sub>2</sub>*), 125.7, 124.4 (s, *CPh<sub>2</sub>C=C*), 123.6 (br m, *Cipso* B(C<sub>6</sub>F<sub>5</sub>)<sub>4</sub>), 107.6 (br s, CH<sub>2</sub>CH=CH...Mn), 88.5 (br s, CH<sub>2</sub>CH=CH...Mn), 39.8 (br d, <sup>1</sup>J<sub>PC</sub> = 20 Hz, PCH<sub>2</sub>P), 27.5 (br s, CH<sub>2</sub>(CH=CH)<sub>2</sub>).

IR (CH<sub>2</sub>Cl<sub>2</sub>, 180 K): ν<sub>CO</sub> 2063 cm<sup>-1</sup>; IR (*n*BuCl, 160 K): ν<sub>CO</sub> 2064 cm<sup>-1</sup>.

**Compound 5:** <sup>1</sup>H NMR (600.1 MHz, CD<sub>2</sub>Cl<sub>2</sub>, 213 K): δ 7.66-7.45 (m overlapped with signals of *fac*-[**3**](B(C<sub>6</sub>F<sub>5</sub>)<sub>4</sub>), 20H, CH<sub>Ar</sub>), 6.46 (d, <sup>3</sup>J<sub>HH</sub> = 10.2 Hz, 2H, CH<sub>2</sub>(CH=CH)<sub>2</sub>), 5.88 (br dt, <sup>3</sup>J<sub>HH</sub> = 9.2 Hz, 1H, <sup>3</sup>J<sub>HH</sub> = 4.2 Hz, 2H, CH<sub>2</sub>(CH=CH)<sub>2</sub>), 3.07 (s, 2H, CH<sub>2</sub>(CH=CH)<sub>2</sub>).

### Low temperature NMR monitoring of the reaction between complex *fac*-**1** and B(C<sub>6</sub>F<sub>5</sub>)<sub>3</sub> and spectroscopic characterization of complexes *fac*-[**3**](BH(C<sub>6</sub>F<sub>5</sub>)<sub>3</sub>) and *fac*-[**2**](BH(C<sub>6</sub>F<sub>5</sub>)<sub>3</sub>).

The evidence of Lewis acid adducts formation by <sup>1</sup>H and <sup>31</sup>P NMR spectroscopy is illustrated in Figures S26 and S29, respectively. Several very broad signals presented in low-temperature <sup>1</sup>H NMR spectra in 5-to-3 ppm region (Figure 28) may be attributed to PCH<sub>2</sub>P resonances of these adducts and/or cationic *mer*-[**3**](BHAr<sub>3</sub>) intermediate involved into fluxional process. While two isomers of cationic *fac*-[**3**](BHAr<sub>3</sub>) products (*ca.* 3:1 ratio at 183 K) attributed to *fac,anti*- (major, **A**) and *fac,syn*- (minor, **B**) forms according to the results of DFT calculations (see page S41) were observed in 183-233 K temperature range, these species at 243 K starts to transform into *fac*-[**2**](BH(C<sub>6</sub>F<sub>5</sub>)<sub>3</sub>) being the principal component at 273 K. The spectroscopic characteristics of *fac*-[**3**](BAr<sub>4</sub>) and *fac*-[**2**](BH(C<sub>6</sub>F<sub>5</sub>)<sub>3</sub>) are quite similar and a sole notable difference between them deals with strong shielding of PCH<sub>2</sub>P protons by 0.5-1.0 ppm in the latter (Figures S27-S28).

#### *fac*-[**3**](BH(C<sub>6</sub>F<sub>5</sub>)<sub>3</sub>):

<sup>1</sup>H NMR (600.1 MHz, CD<sub>2</sub>Cl<sub>2</sub>, 183 K) δ 5.23 (dt, <sup>2</sup>J<sub>HH</sub> = 16.7 Hz, <sup>2</sup>J<sub>PH</sub> = 10.2 Hz, 0.7H, PCH<sub>2</sub>P, **A**), 4.93-4.80 (m, 0.6H, PCH<sub>2</sub>P, **B**), 4.76 (dt, <sup>2</sup>J<sub>HH</sub> = 16.7 Hz, <sup>2</sup>J<sub>PH</sub> = 11.9 Hz, 0.7H, PCH<sub>2</sub>P, **A**).

<sup>1</sup>H{<sup>31</sup>P} NMR (600.1 MHz, CD<sub>2</sub>Cl<sub>2</sub>, 183 K) δ 5.26 (d, <sup>2</sup>J<sub>HH</sub> = 16.7 Hz, PCH<sub>2</sub>P, **A**), 4.89 (d, <sup>2</sup>J<sub>HH</sub> = 16.6 Hz, PCH<sub>2</sub>P, **B**), 4.81 (d, <sup>2</sup>J<sub>HH</sub> = 16.6 Hz, PCH<sub>2</sub>P, **B**), 4.76 (d, <sup>2</sup>J<sub>HH</sub> = 16.7 Hz, PCH<sub>2</sub>P, **A**).

<sup>31</sup>P{<sup>1</sup>H} NMR (243.0 MHz, CD<sub>2</sub>Cl<sub>2</sub>, 183 K): δ 11.1 (s, **B**), 10.1 (s, **A**).

#### *fac*-[**2**](BH(C<sub>6</sub>F<sub>5</sub>)<sub>3</sub>):

<sup>1</sup>H NMR (600.1 MHz, CD<sub>2</sub>Cl<sub>2</sub>, 273 K) δ 7.46-7.36 (m, 12H, CH<sub>Ph</sub>), 7.21-7.14 (m, 4H, CH<sub>Ph</sub>), 7.12-7.06 (m, 4H, CH<sub>Ph</sub>), 4.58 (dt, <sup>2</sup>J<sub>HH</sub> = 15.6 Hz, <sup>2</sup>J<sub>PH</sub> = 10.6 Hz, 1H, PCH<sub>2</sub>P), 3.85 (dt, <sup>2</sup>J<sub>HH</sub> = 15.6 Hz, <sup>2</sup>J<sub>PH</sub> = 10.9 Hz, 1H, PCH<sub>2</sub>P), 3.68 (very br, 1H, BH(C<sub>6</sub>F<sub>5</sub>)<sub>3</sub>).

<sup>31</sup>P{<sup>1</sup>H} NMR (243.0 MHz, CD<sub>2</sub>Cl<sub>2</sub>, 273 K): δ 10.1 (s).

<sup>11</sup>B NMR (192.5 MHz, CD<sub>2</sub>Cl<sub>2</sub>, 273 K): δ 25.4 (br s).

<sup>13</sup>C{<sup>1</sup>H} NMR (150.9 MHz, 253 K, CD<sub>2</sub>Cl<sub>2</sub>): 219.5 (t, <sup>2</sup>J<sub>PC</sub> = 18.4 Hz, Mn-CO), 217.2 (br s, Mn-CO), 148.3 (br d, <sup>1</sup>J<sub>BF</sub> = 243.6 Hz, *Cortho* BH(C<sub>6</sub>F<sub>5</sub>)<sub>3</sub>), 139.3 (br d, <sup>1</sup>J<sub>BF</sub> = 248.0 Hz, *Cpara* BH(C<sub>6</sub>F<sub>5</sub>)<sub>3</sub>), 136.2 (br d, <sup>1</sup>J<sub>BF</sub> = 245.7 Hz, *Cmeta* B(C<sub>6</sub>F<sub>5</sub>)<sub>4</sub>), 131.9 (vt, *J*<sub>PC</sub> = 5.2 Hz, CH<sub>PPh<sub>2</sub></sub>), 131.7, 131.5 (s, CH<sub>PPh<sub>2</sub></sub>), 131.4 (vt, *J*<sub>PC</sub> = 5.4 Hz, CH<sub>PPh<sub>2</sub></sub>), 130.7 (vt, *J*<sub>PC</sub> = 21.8 Hz, *Cipso-PPh<sub>2</sub>*), 130.4 (vt, *J*<sub>PC</sub> = 20.0 Hz, *Cipso-PPh<sub>2</sub>*), 129.4 (vt overlapped with another vt, *J*<sub>PC</sub> = 4.9 Hz, CH<sub>PPh<sub>2</sub></sub>), 129.3 (vt overlapped with another vt, *J*<sub>PC</sub> = 5.1 Hz, CH<sub>PPh<sub>2</sub></sub>), 119.0 (br m, *Cipso* BH(C<sub>6</sub>F<sub>5</sub>)<sub>3</sub>), 38.4 (t, <sup>1</sup>J<sub>PC</sub> = 20.6 Hz, PCH<sub>2</sub>P).

IR (CH<sub>2</sub>Cl<sub>2</sub>, 290 K): ν<sub>CO</sub> 2037, 1968, 1946 cm<sup>-1</sup>; IR (*n*BuCl, 290 K): ν<sub>CO</sub> 2040, 1970, 1943 cm<sup>-1</sup>; IR (toluene, 290 K): ν<sub>CO</sub> 2037, 1967, 1942 cm<sup>-1</sup>.

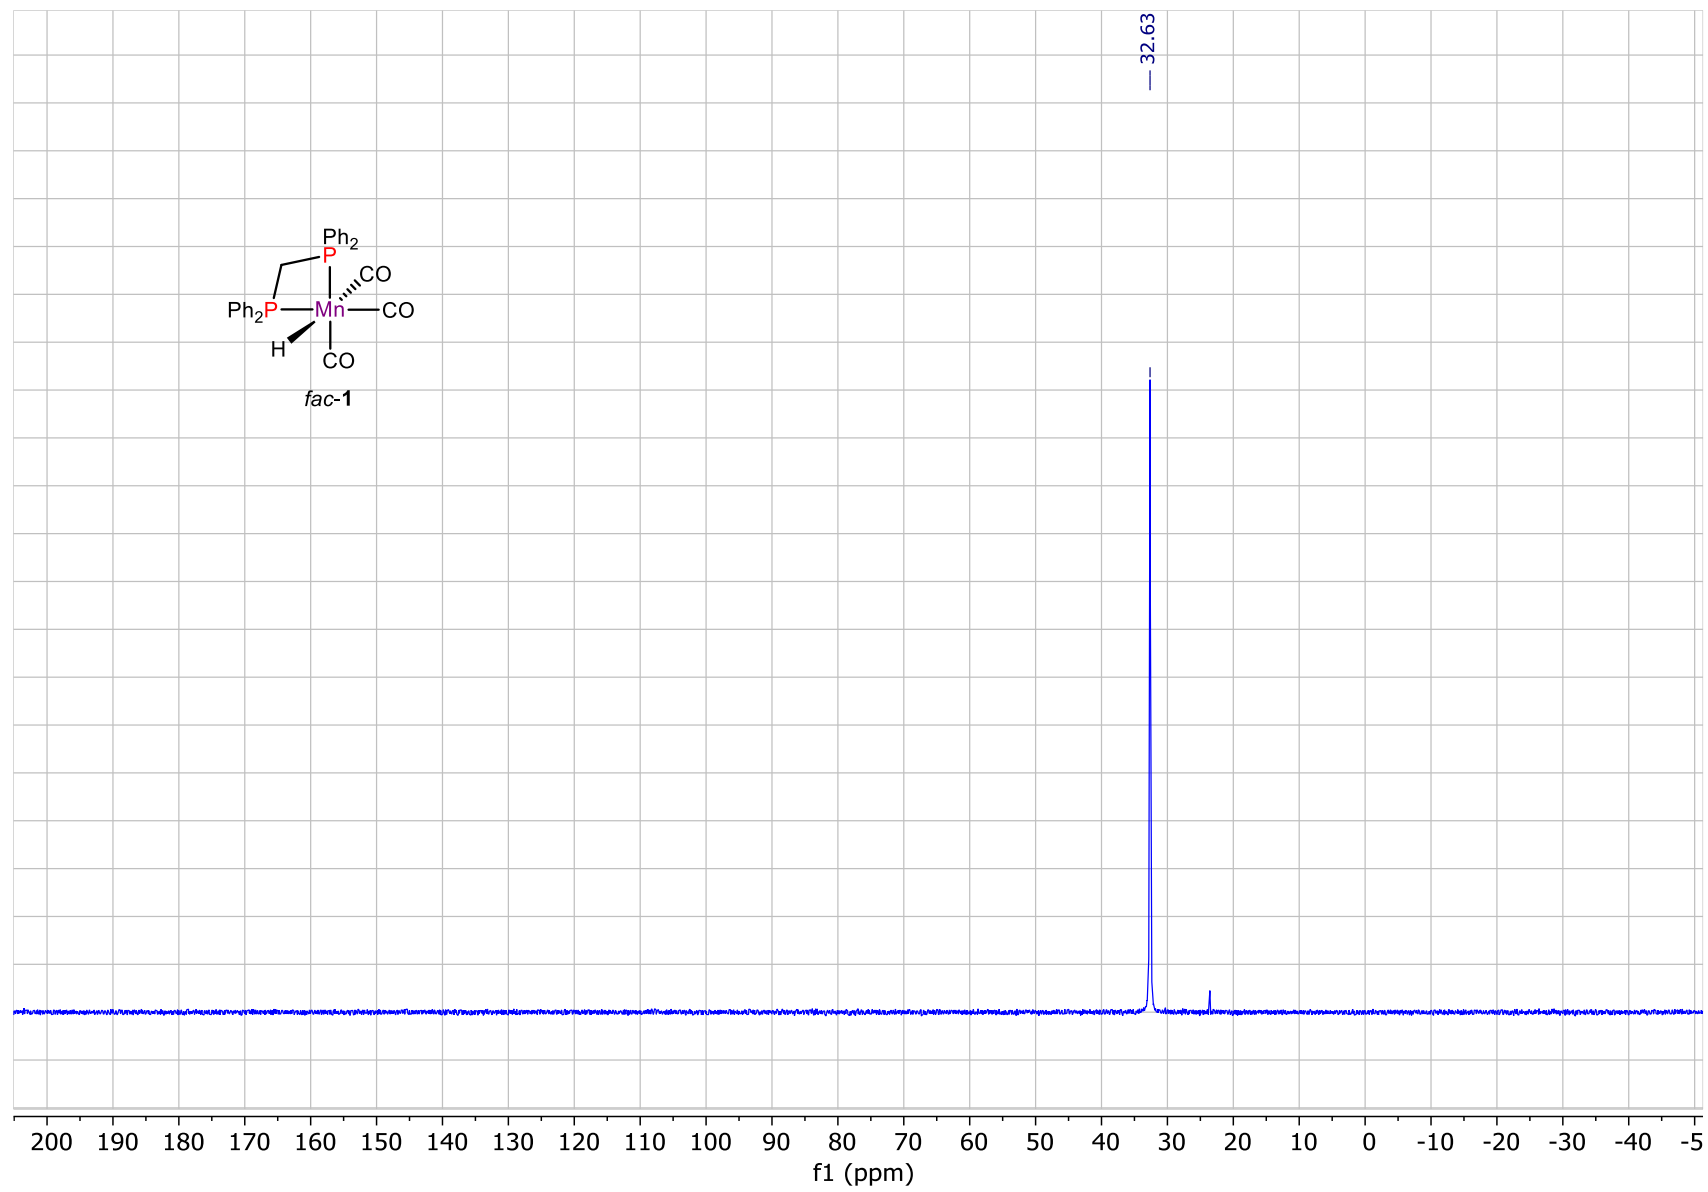

**Figure S8.**  $^{31}\text{P}\{^1\text{H}\}$  NMR spectrum of complex *fac-1* (162.0 MHz,  $\text{CD}_2\text{Cl}_2$ , 298 K).

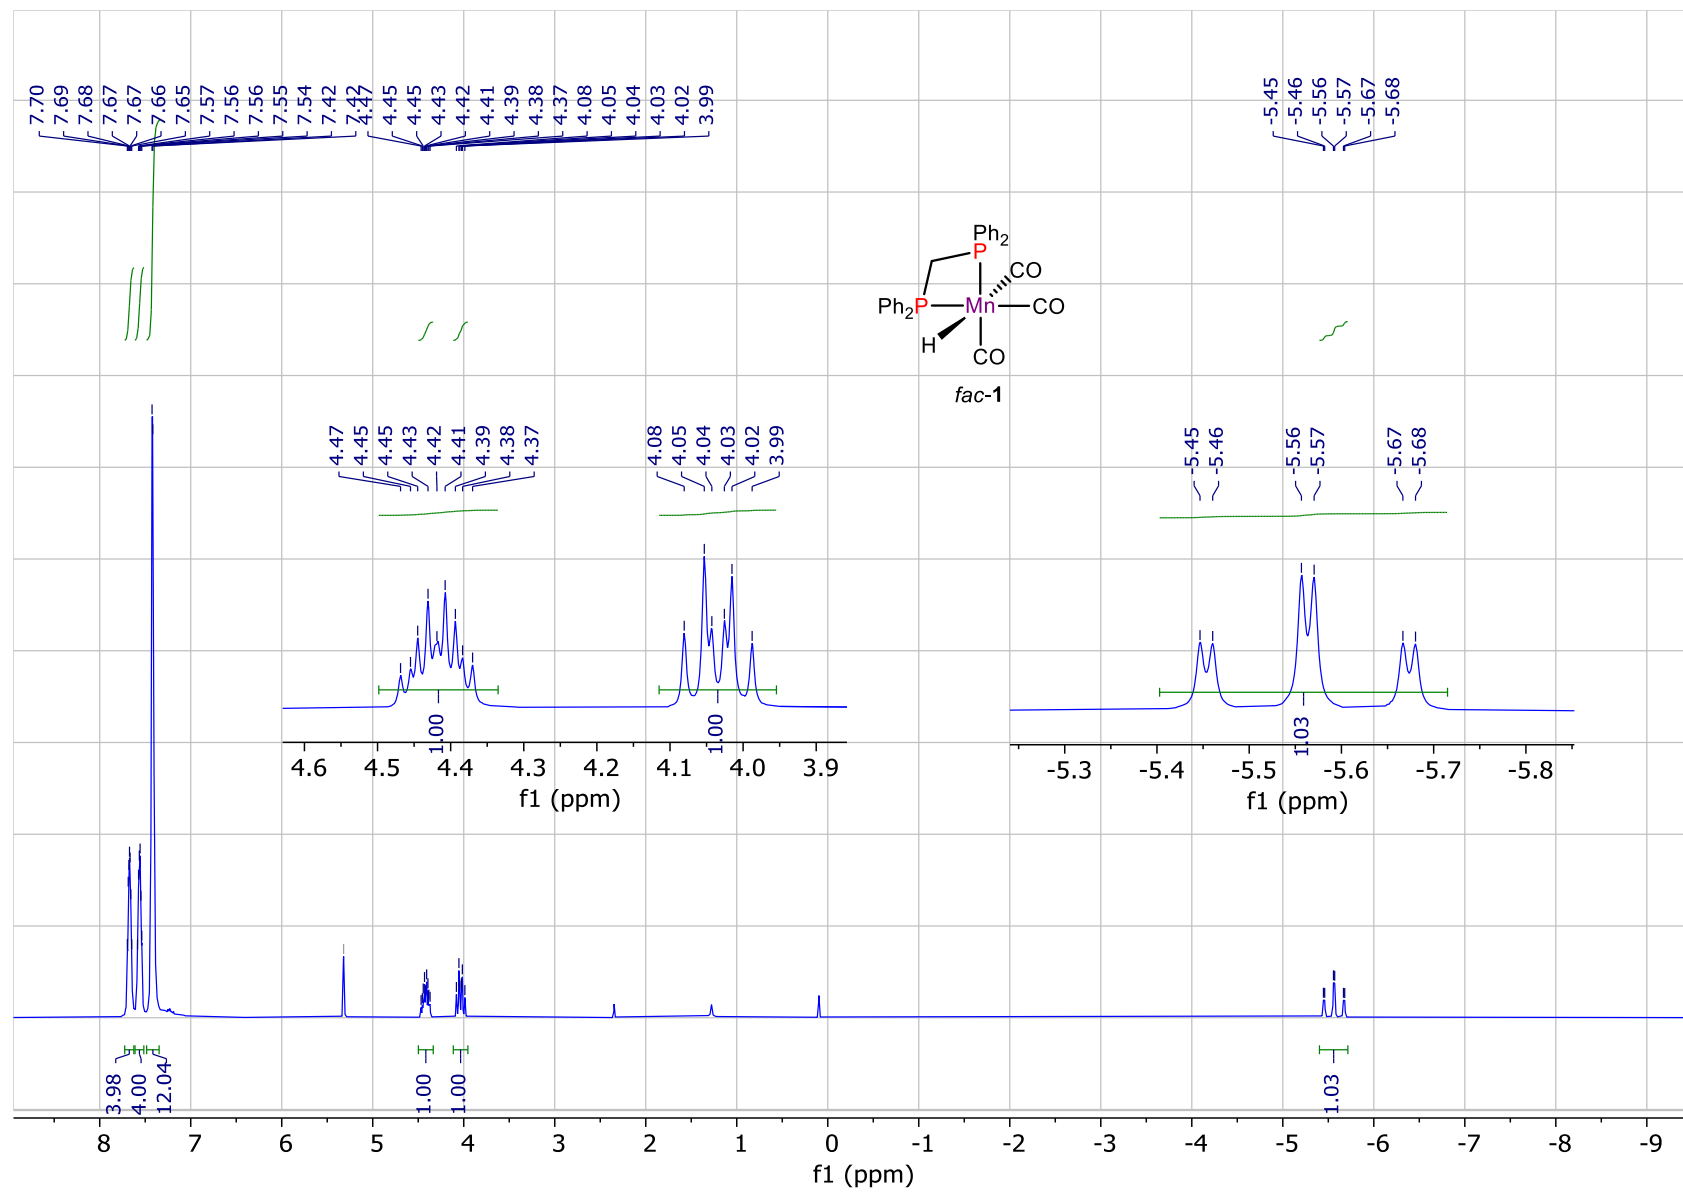

**Figure S9.** <sup>1</sup>H NMR spectrum of complex *fac-1* (400.1 MHz, CD<sub>2</sub>Cl<sub>2</sub>, 298 K).

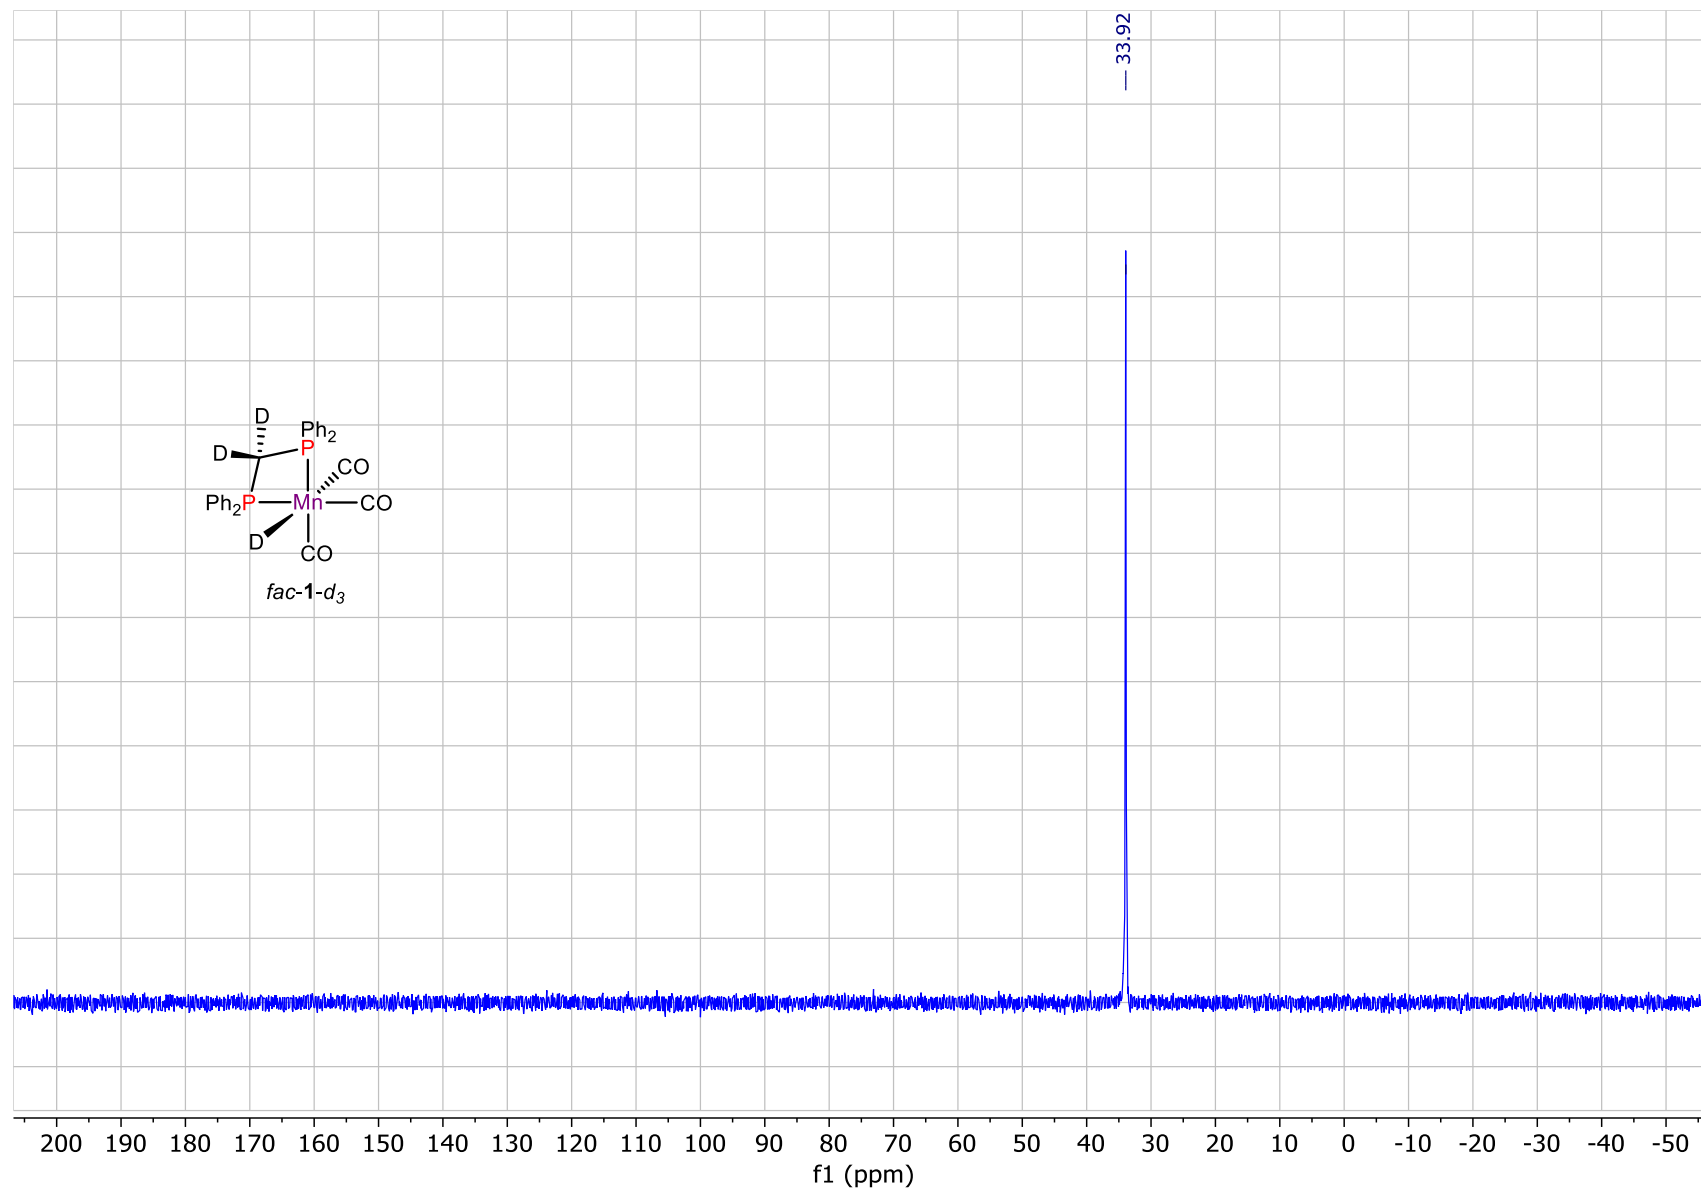

**Figure S10.**  $^{31}\text{P}\{^1\text{H}\}$  NMR spectrum of complex *fac-1* (162.0 MHz,  $\text{C}_6\text{D}_6$ , 298 K).

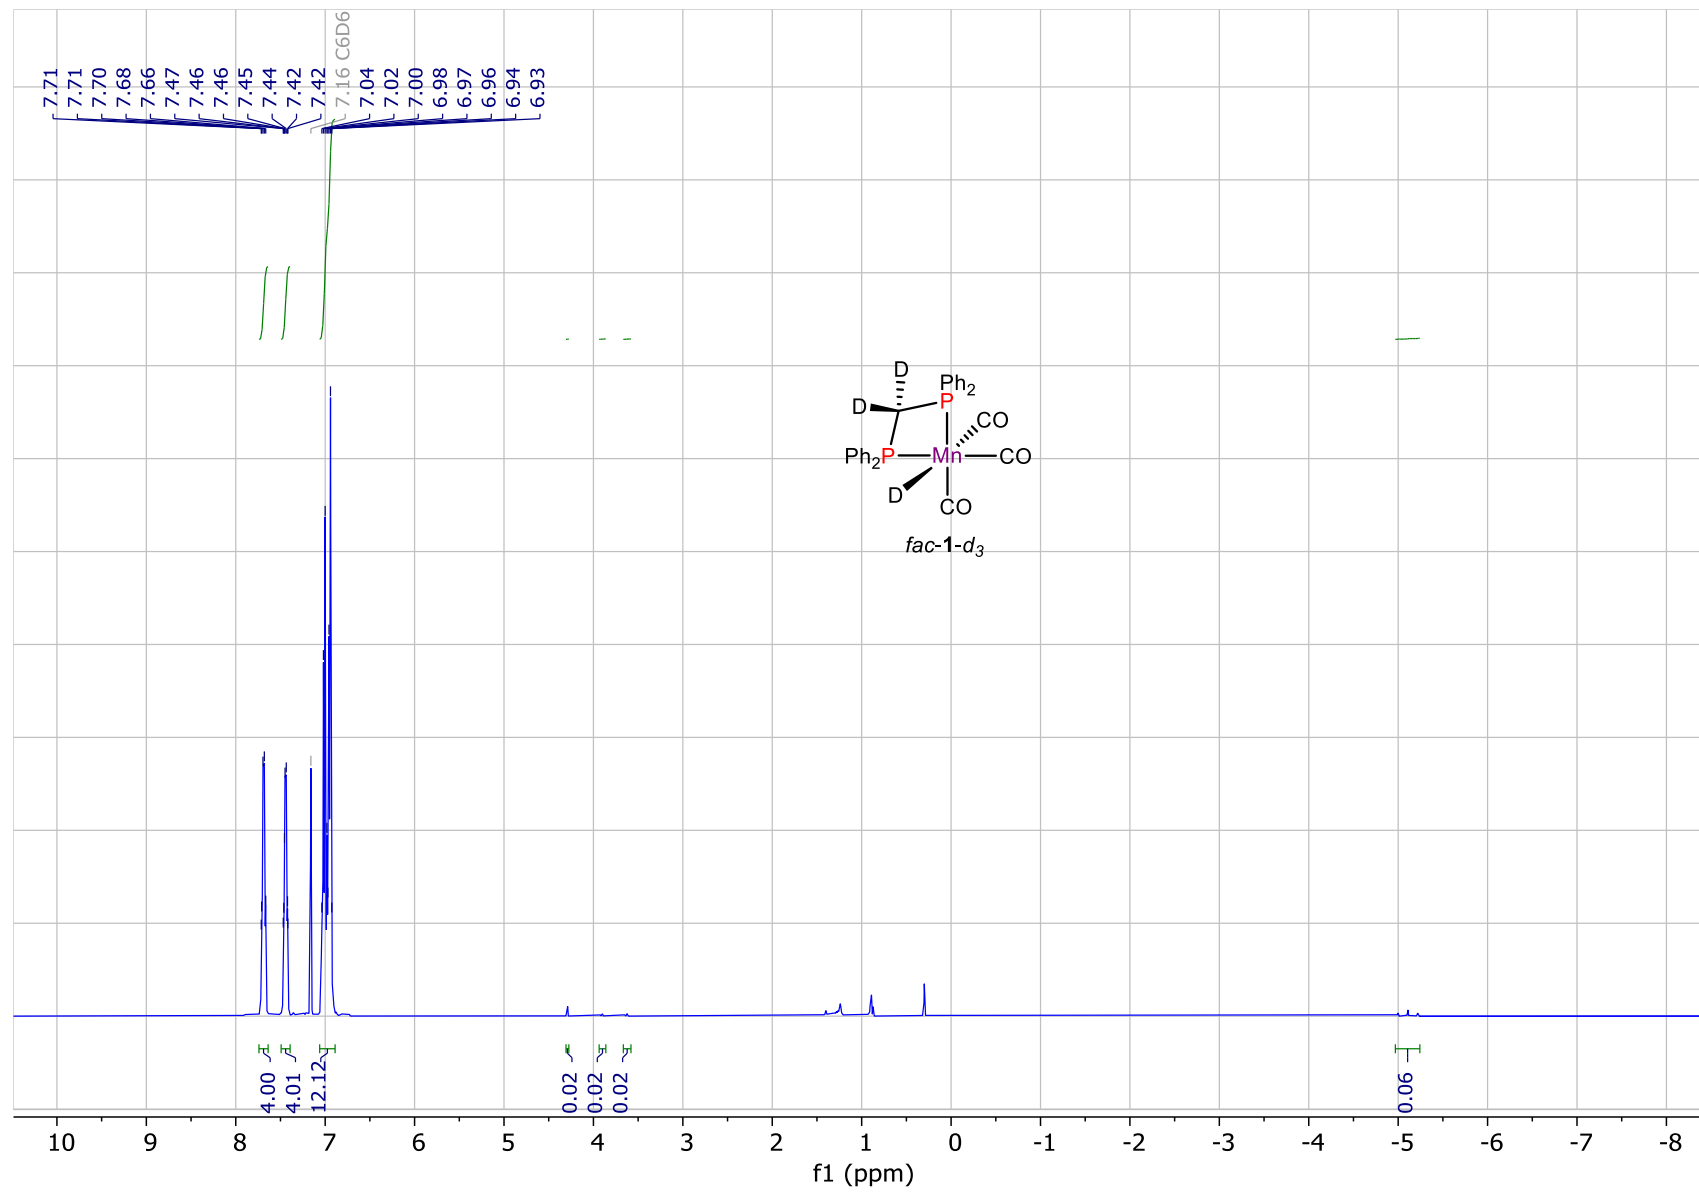

**Figure S11.** <sup>1</sup>H NMR spectrum of complex *fac-1-d<sub>3</sub>* (400.1 MHz, C<sub>6</sub>D<sub>6</sub>, 298 K).

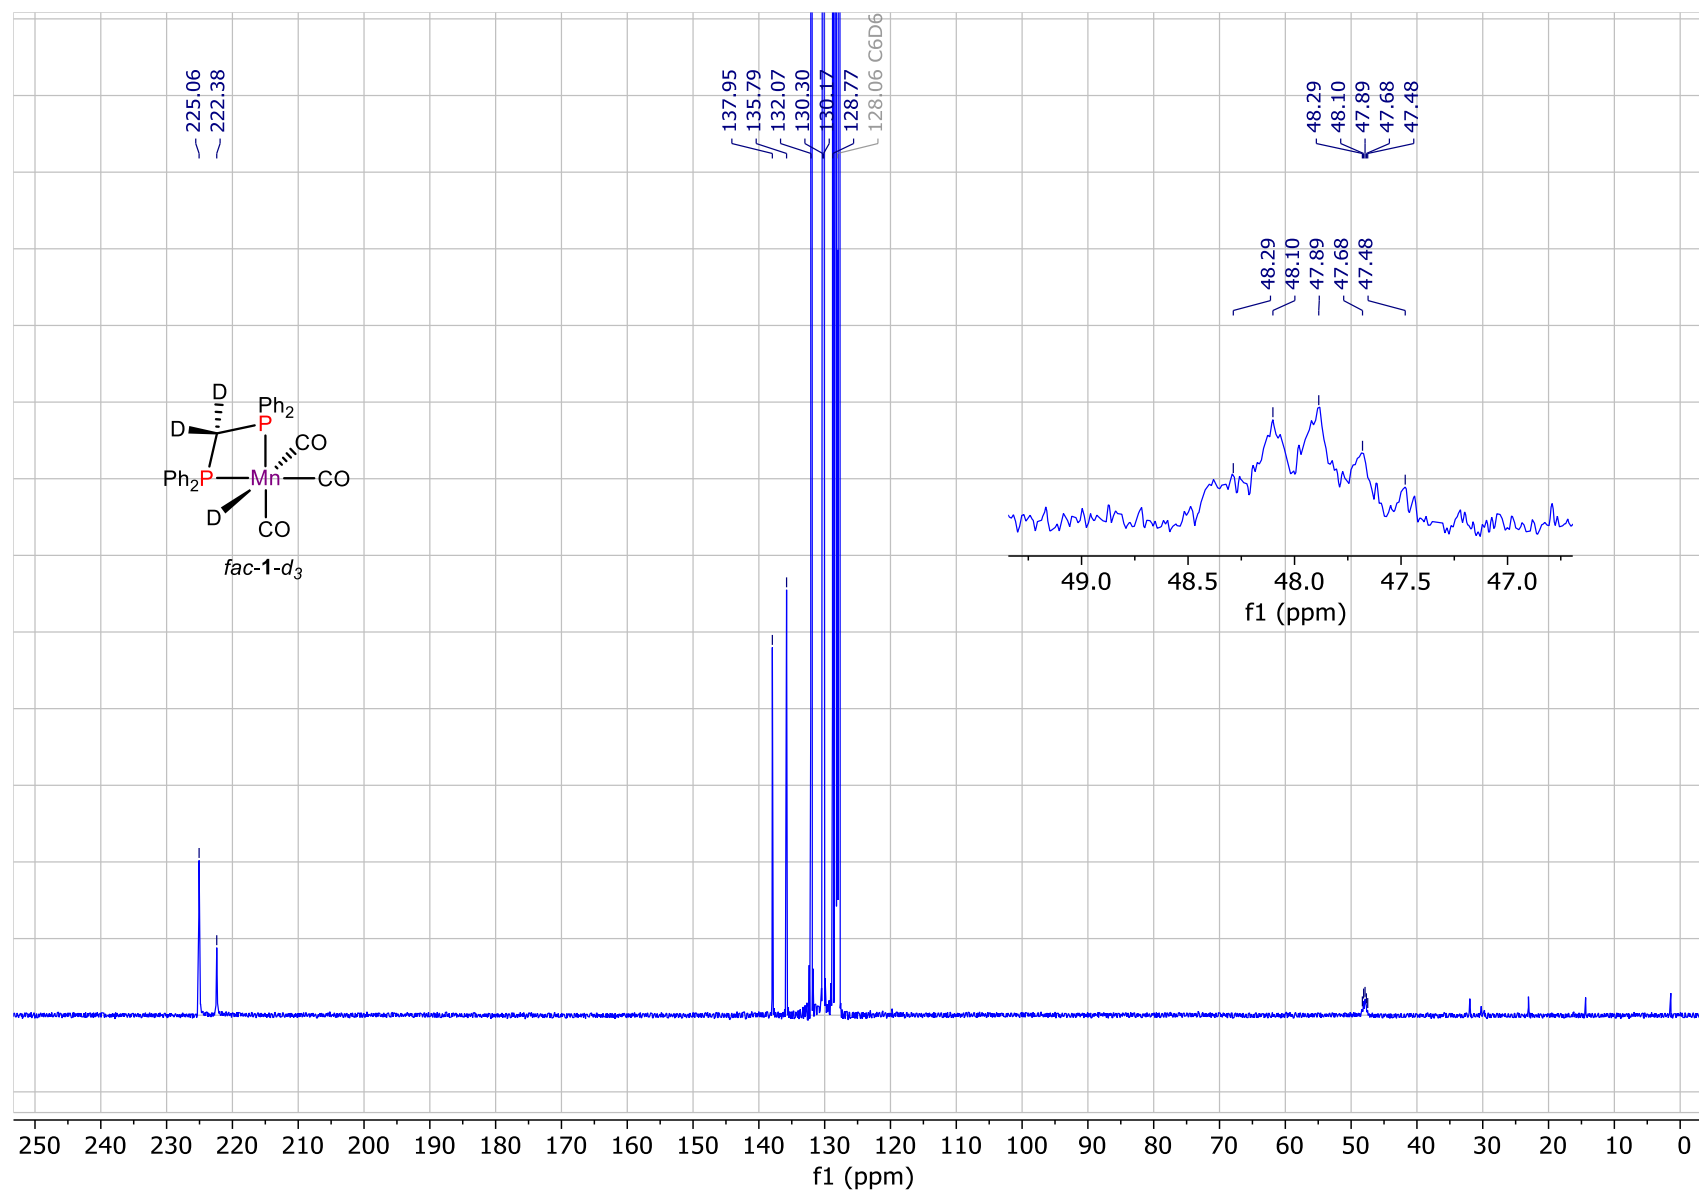

**Figure S12.**  $^{13}\text{C}\{^1\text{H},^{31}\text{P}\}$  NMR spectrum of complex *fac-1-d<sub>3</sub>* (100.6 MHz,  $\text{C}_6\text{D}_6$ , 298 K).

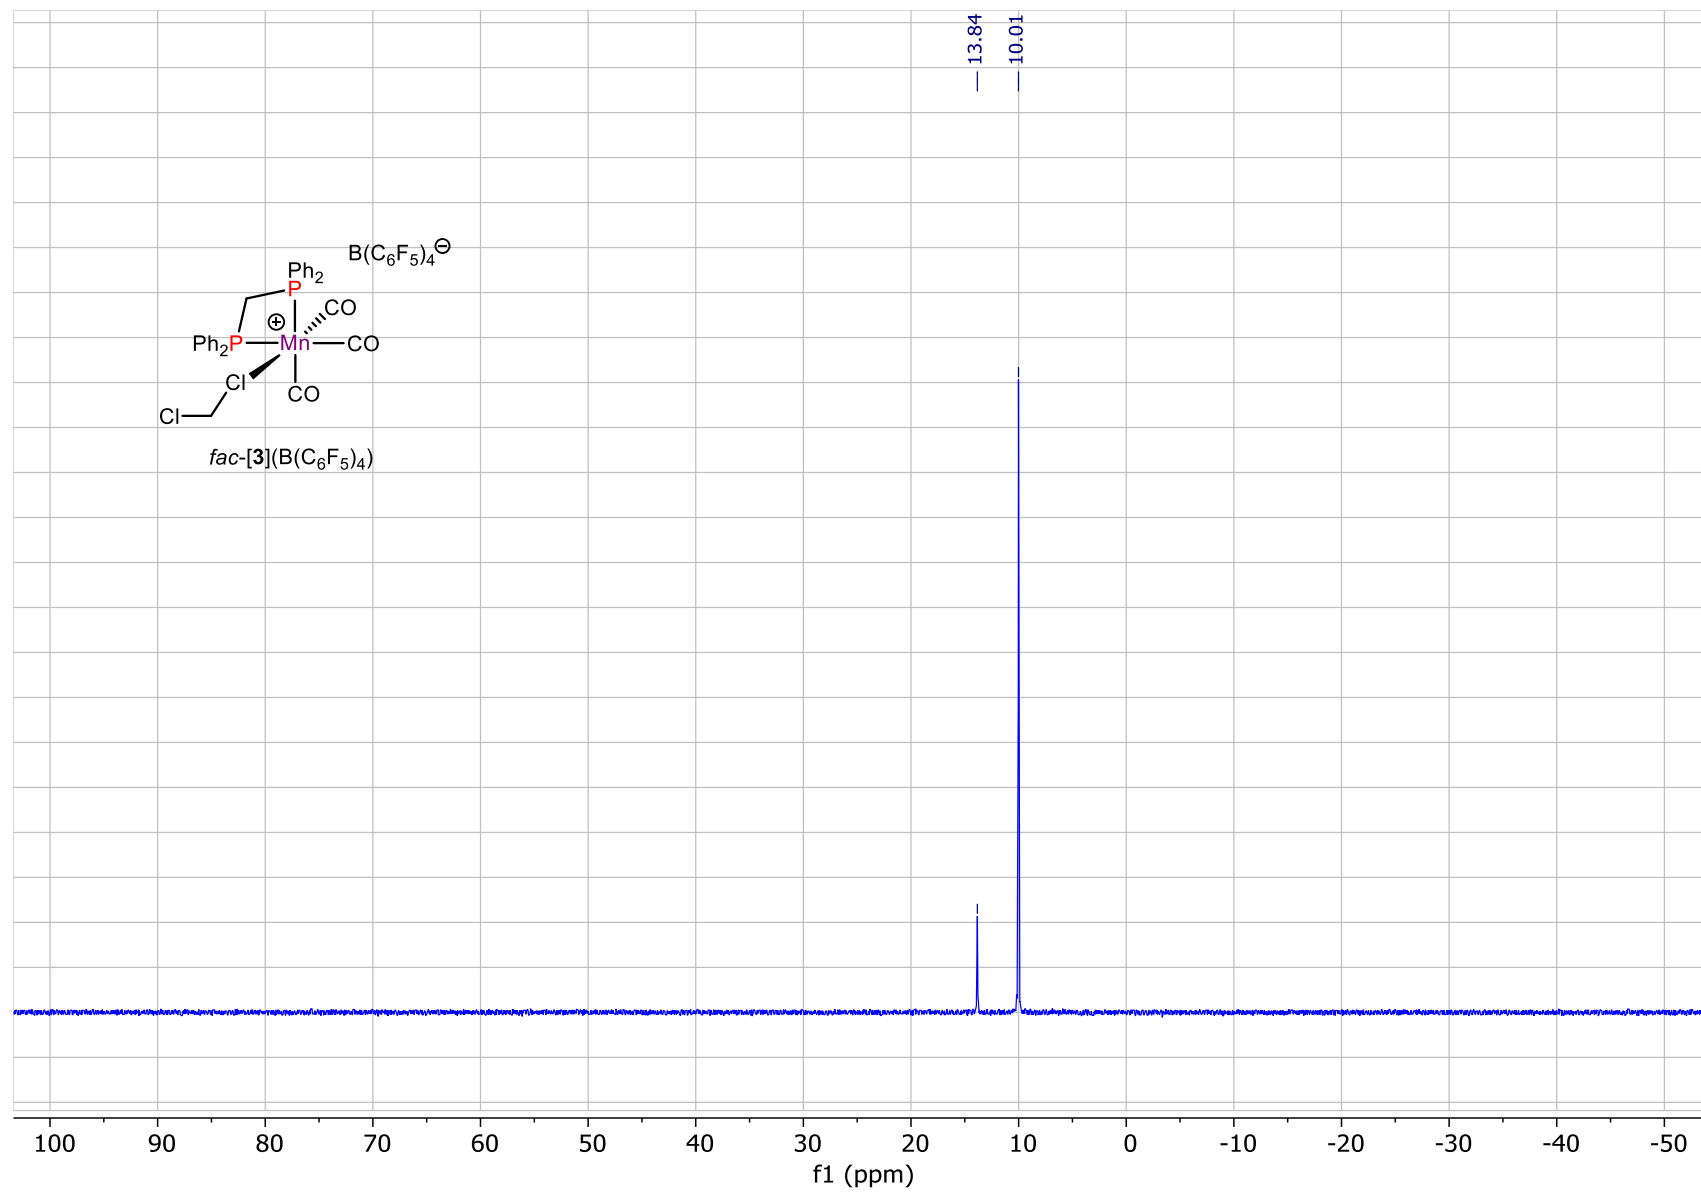

**Figure S13.**  $^{31}\text{P}\{^1\text{H}\}$  NMR spectrum of complex  $\text{fac-}[3](\text{B}(\text{C}_6\text{F}_5)_4)$  (243.0 MHz,  $\text{CD}_2\text{Cl}_2$ , 298 K).



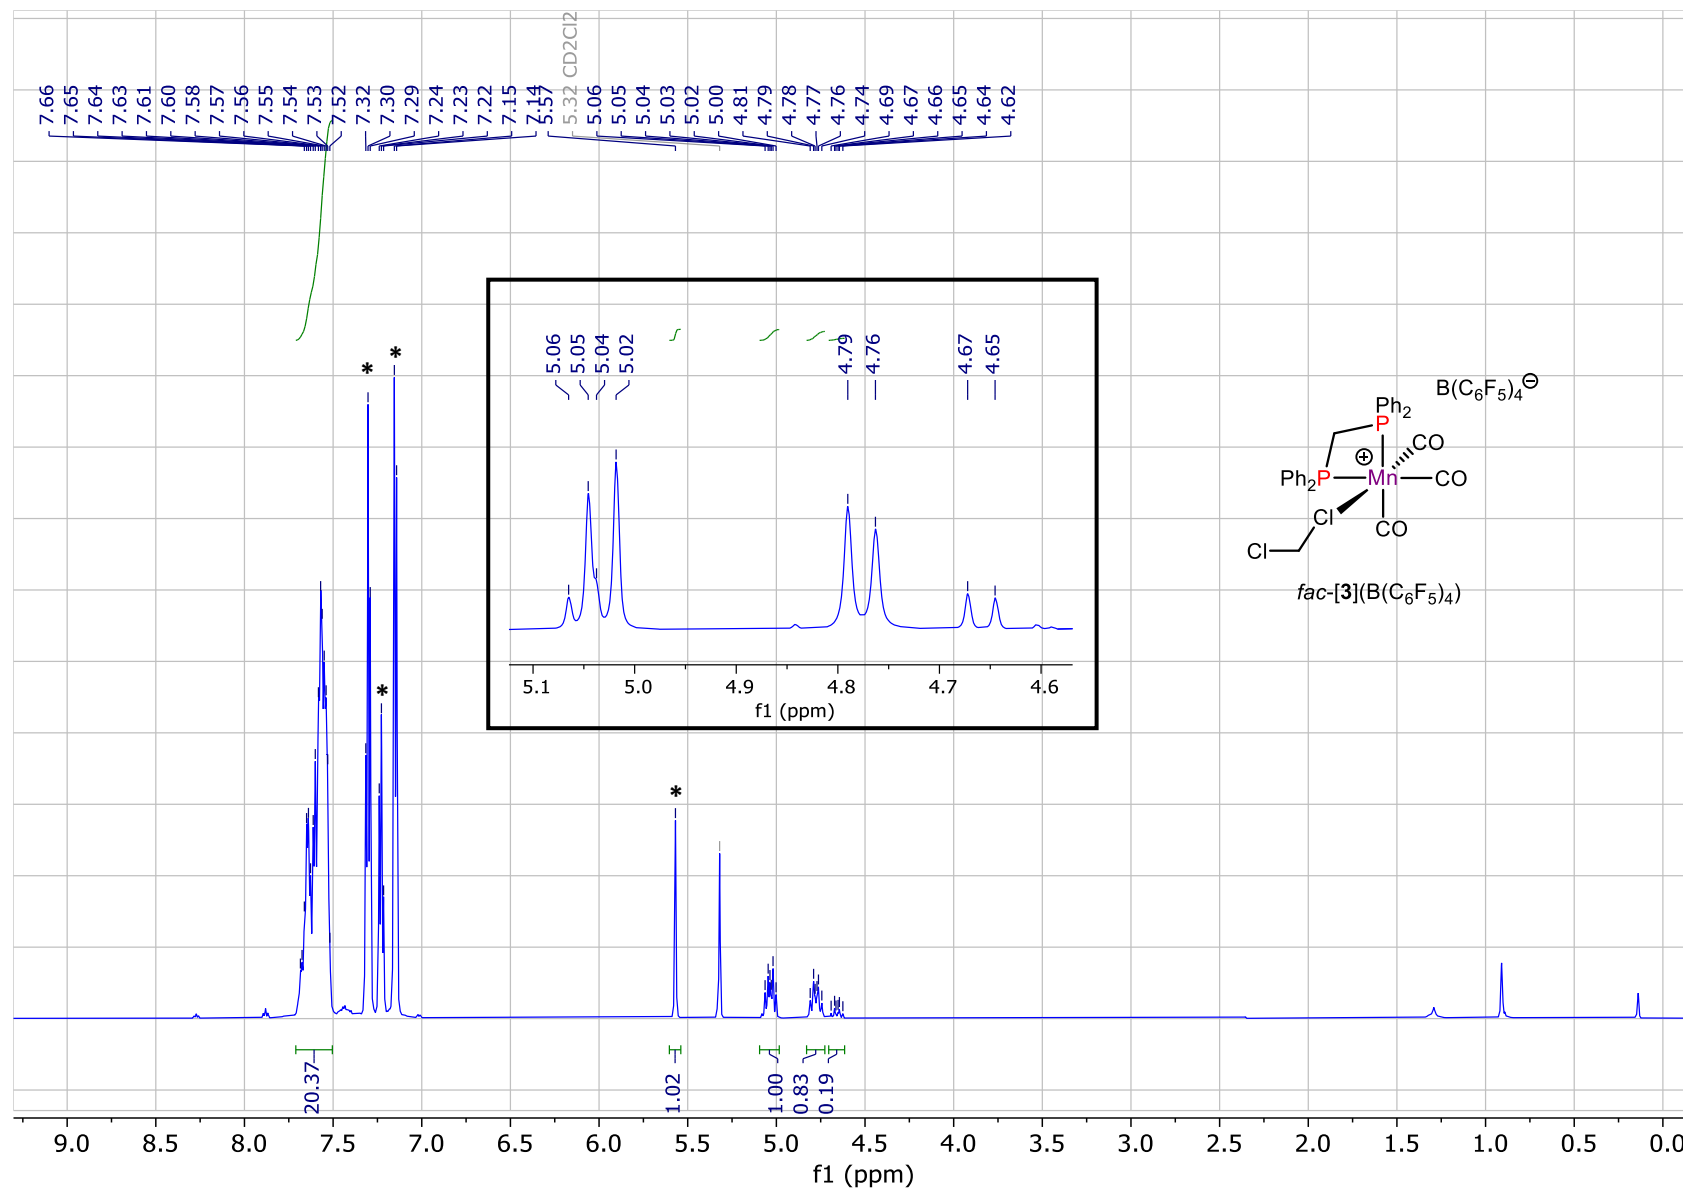

**Figure S14.**  $^1\text{H}$  NMR spectrum of complex  $fac\text{-}[\mathbf{3}](\text{B}(\text{C}_6\text{F}_5)_4)$  (600.1 MHz,  $\text{CD}_2\text{Cl}_2$ , 298 K), the signals of triphenylmethane are marked with asterisk. Inset spectrum corresponds to the section of  $\text{PCH}_2\text{P}$  protons in  $^1\text{H}\{^{31}\text{P}\}$  decoupled experiment.

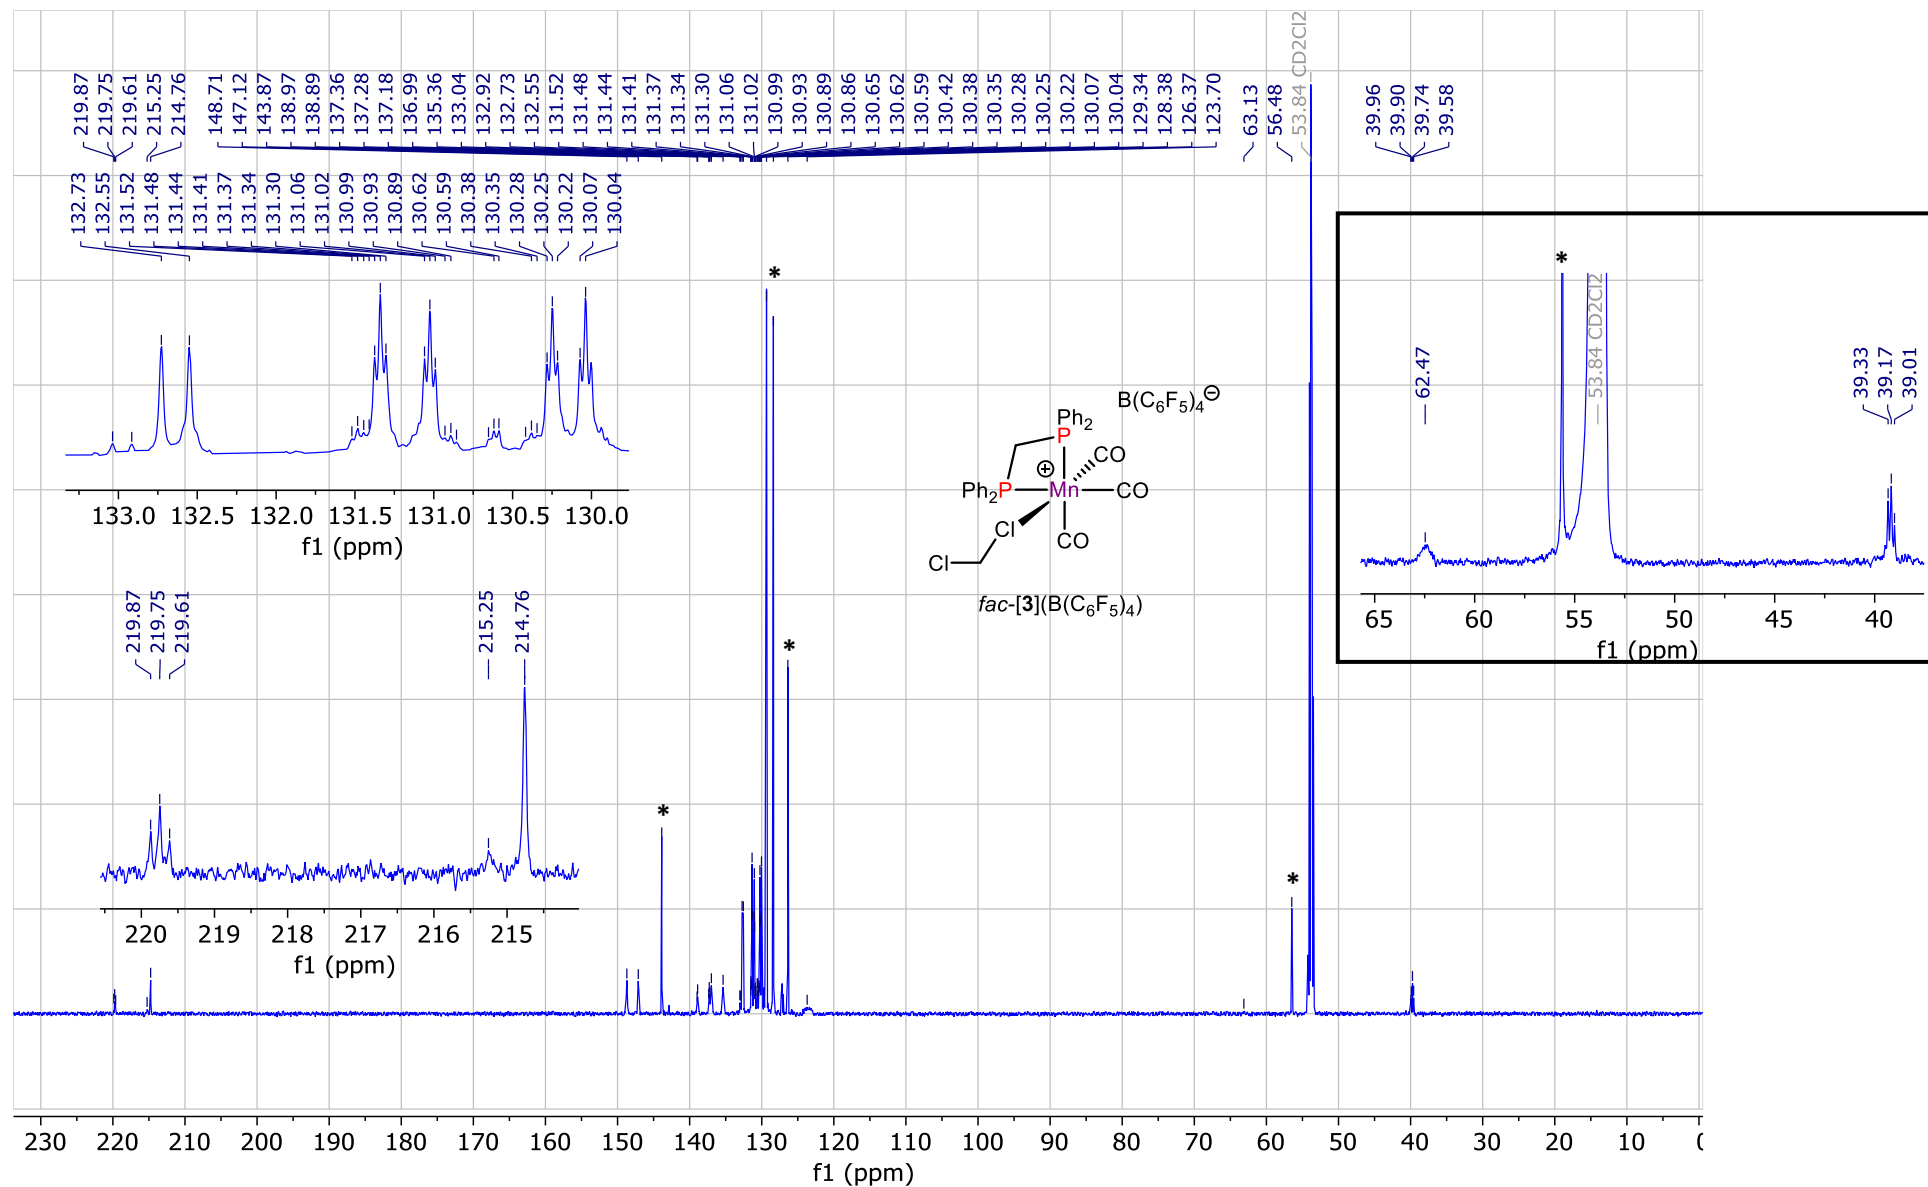

**Figure S15.**  $^{13}\text{C}\{^1\text{H}\}$  NMR spectrum of complex  $fac\text{-}[3](\text{B}(\text{C}_6\text{F}_5)_4)$  (150.9 MHz,  $\text{CD}_2\text{Cl}_2$ , 243 K), the signals of triphenylmethane are marked with asterisk. Inset spectrum corresponds to the section of  $^{13}\text{C}\{^1\text{H}\}$  NMR spectrum for the same compound at 183 K.

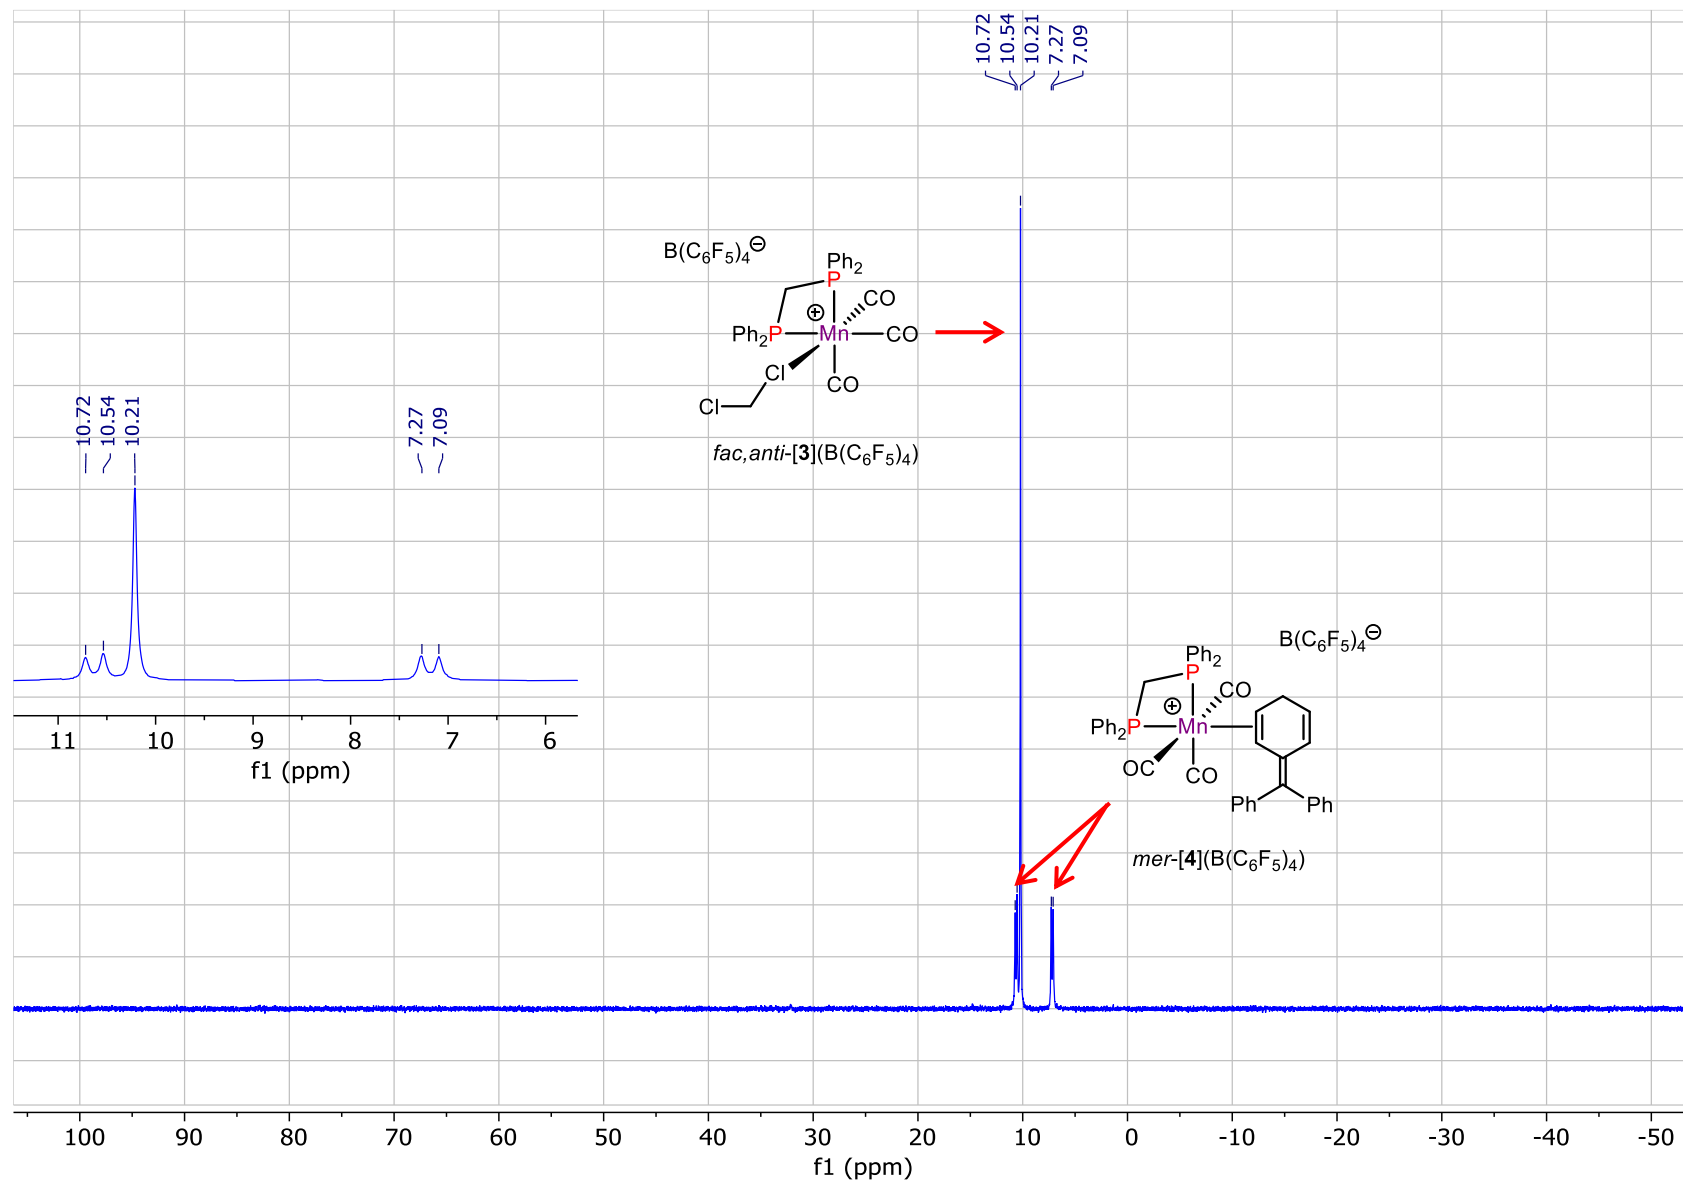

**Figure S16.**  $^{31}\text{P}\{^1\text{H}\}$  NMR spectrum of the reaction between complex *fac-1* and  $[\text{Ph}_3\text{C}](\text{B}(\text{C}_6\text{F}_5)_4)$  (243 MHz,  $\text{CD}_2\text{Cl}_2$ , 183 K).

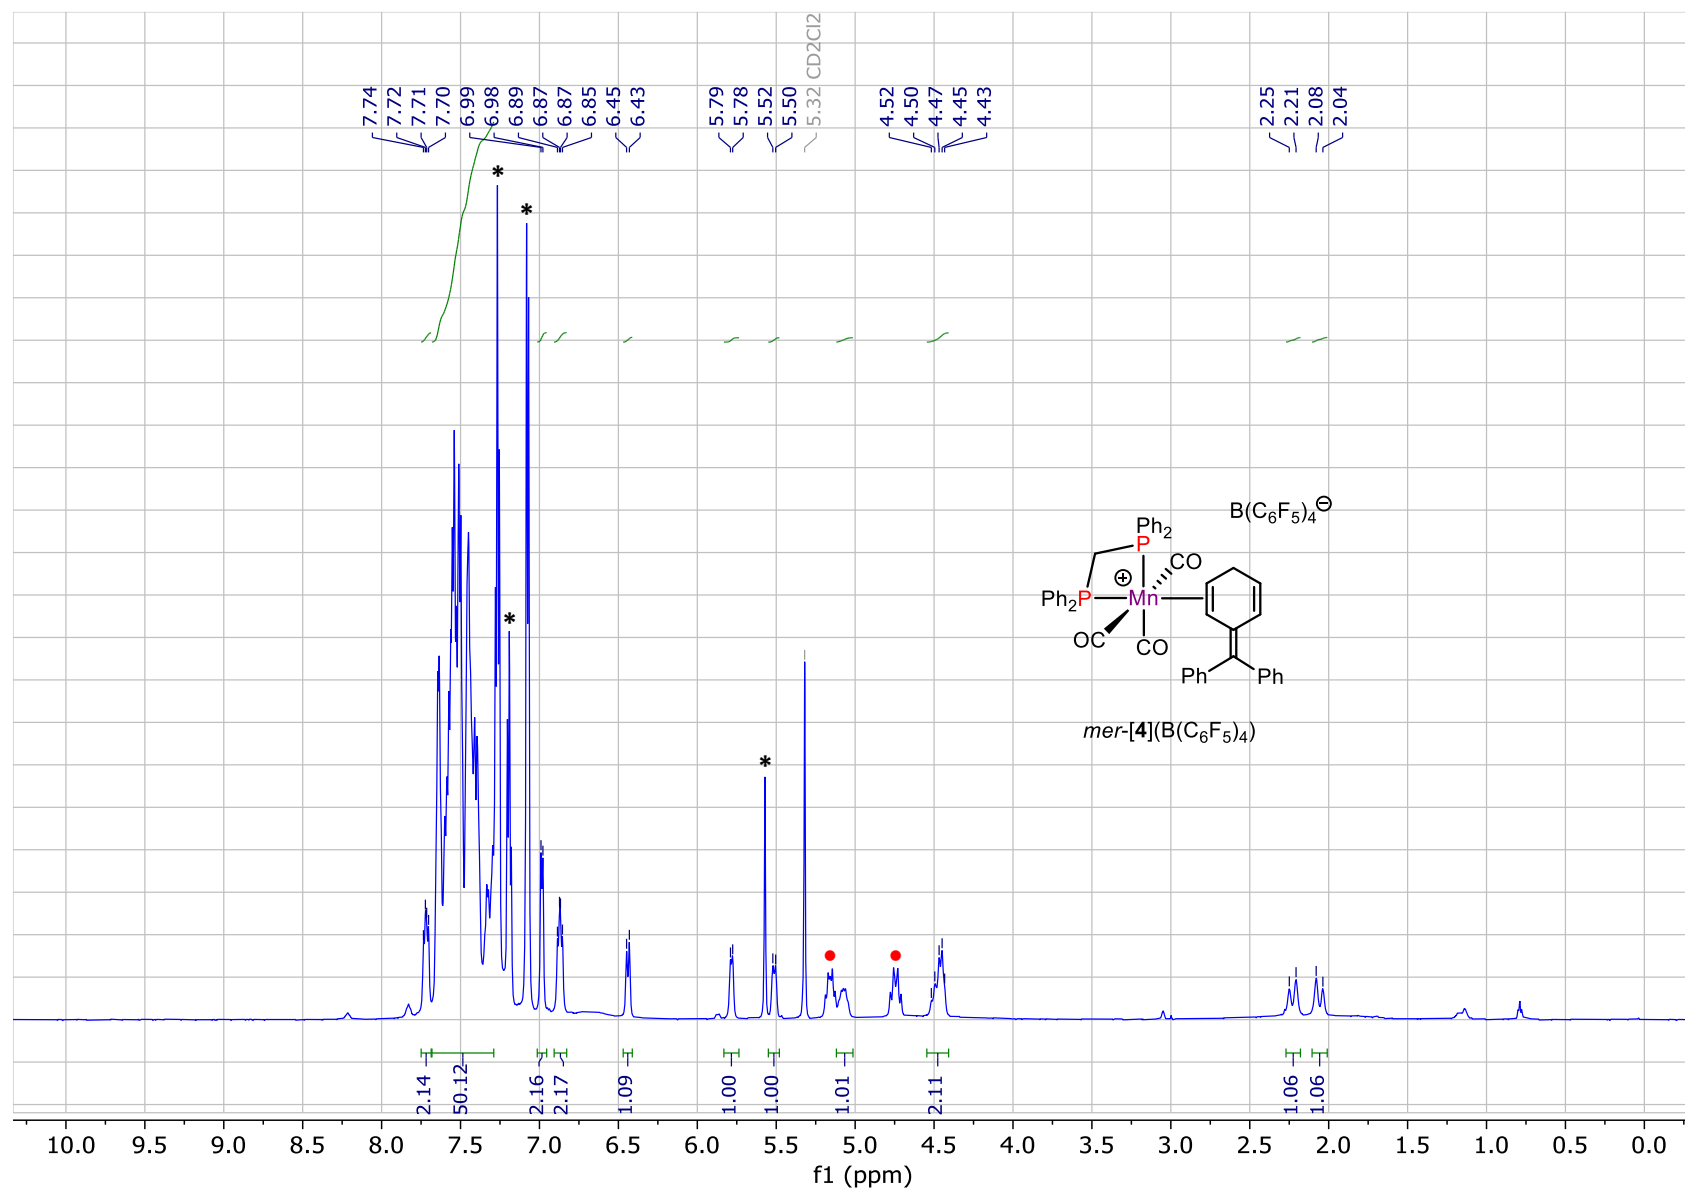

**Figure S17.**  $^1H$  NMR spectrum of the reaction between complex *fac-1* and  $[Ph_3C](B(C_6F_5)_4)$  (600.1 MHz,  $CD_2Cl_2$ , 183 K), only the signals of *mer-4* $(B(C_6F_5)_4)$  are identified and integrated. The signals of non-coordinated  $Ph_3CH$  are marked with asterisk, and those of *fac-3* $(B(C_6F_5)_4)$  with red dots.

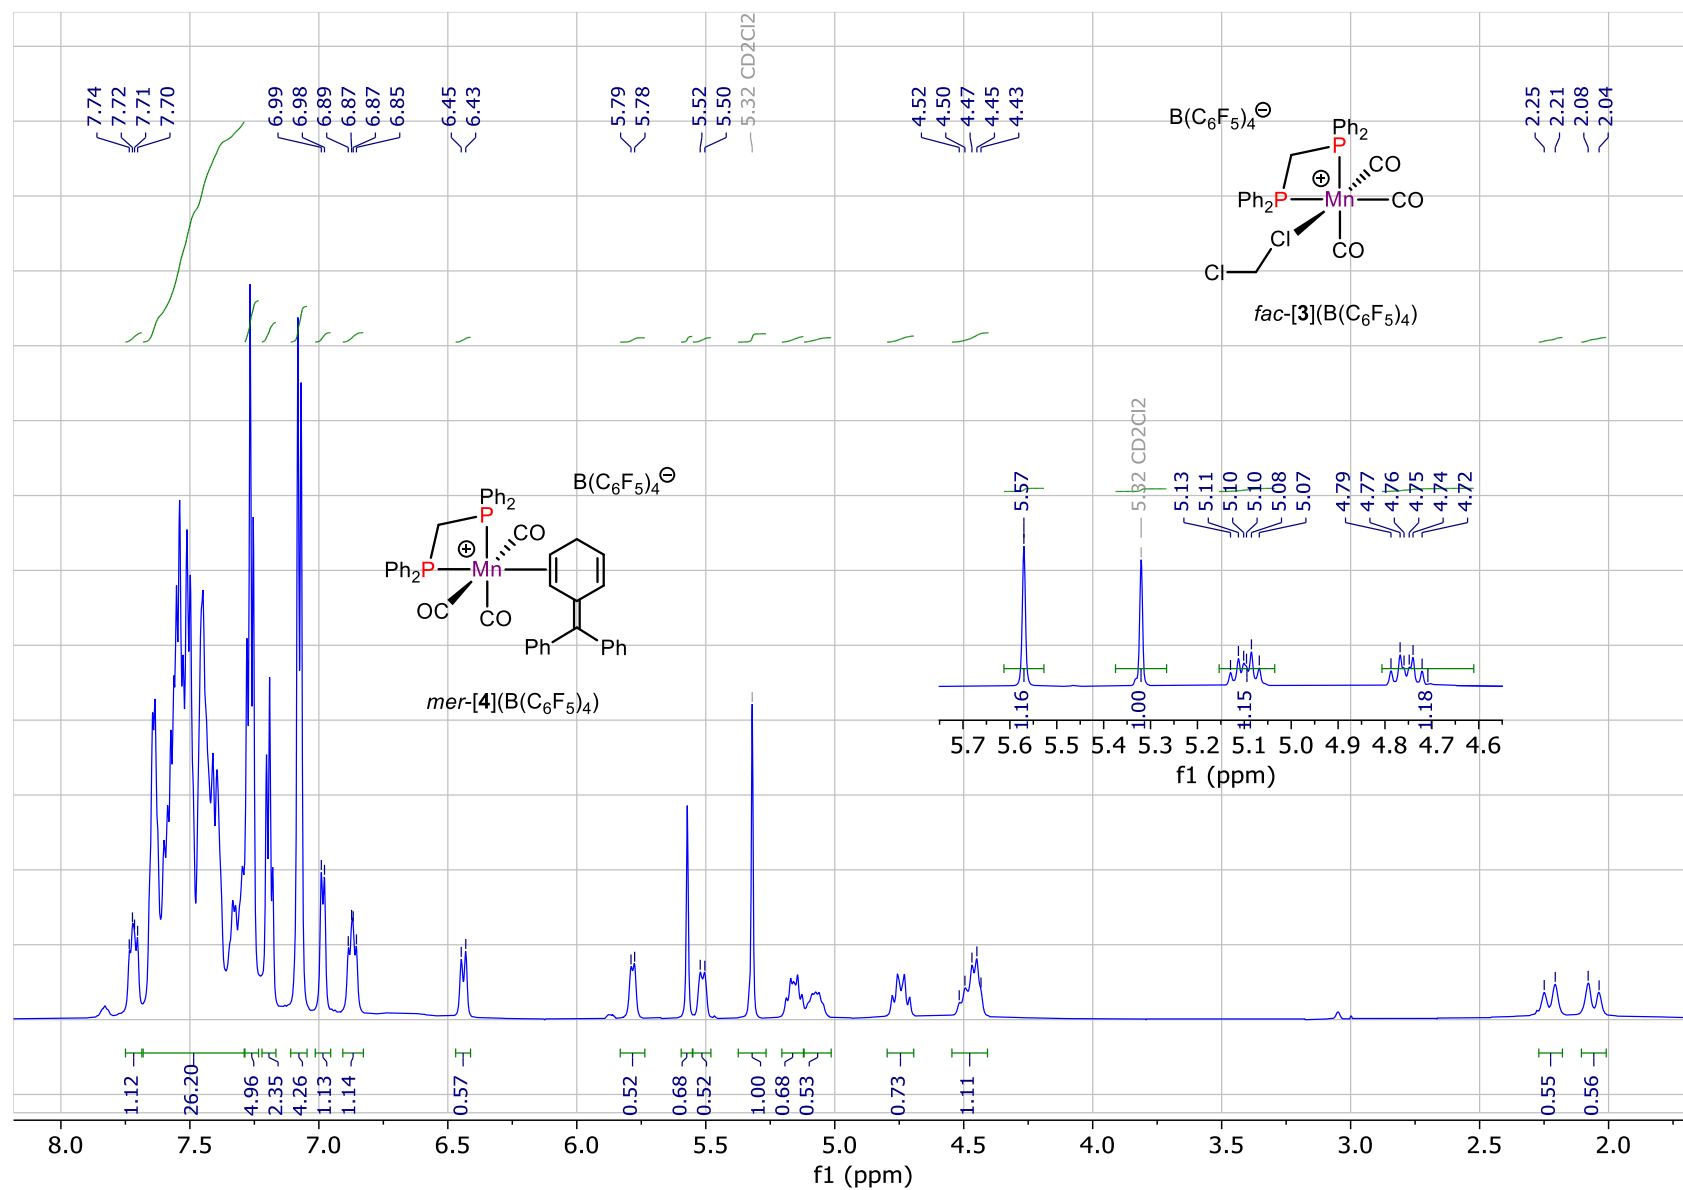

**Figure S18.** Section of  $^1\text{H}$  NMR spectrum (600.1 MHz,  $\text{CD}_2\text{Cl}_2$ ) of the mixture of *mer*-[4]( $\text{B}(\text{C}_6\text{F}_5)_4$ ) and *fac*-[3]( $\text{B}(\text{C}_6\text{F}_5)_4$ ) at 183 K indicating the amount of *fac*-[2]( $\text{B}(\text{C}_6\text{F}_5)_4$ ) and free  $\text{Ph}_3\text{CH}$  (the signal of residual  $\text{CD}_2\text{Cl}_2$  protons was used for internal standard). Inset corresponds to the sample after full conversion into *fac*-[3]( $\text{B}(\text{C}_6\text{F}_5)_4$ ) at 223 K.

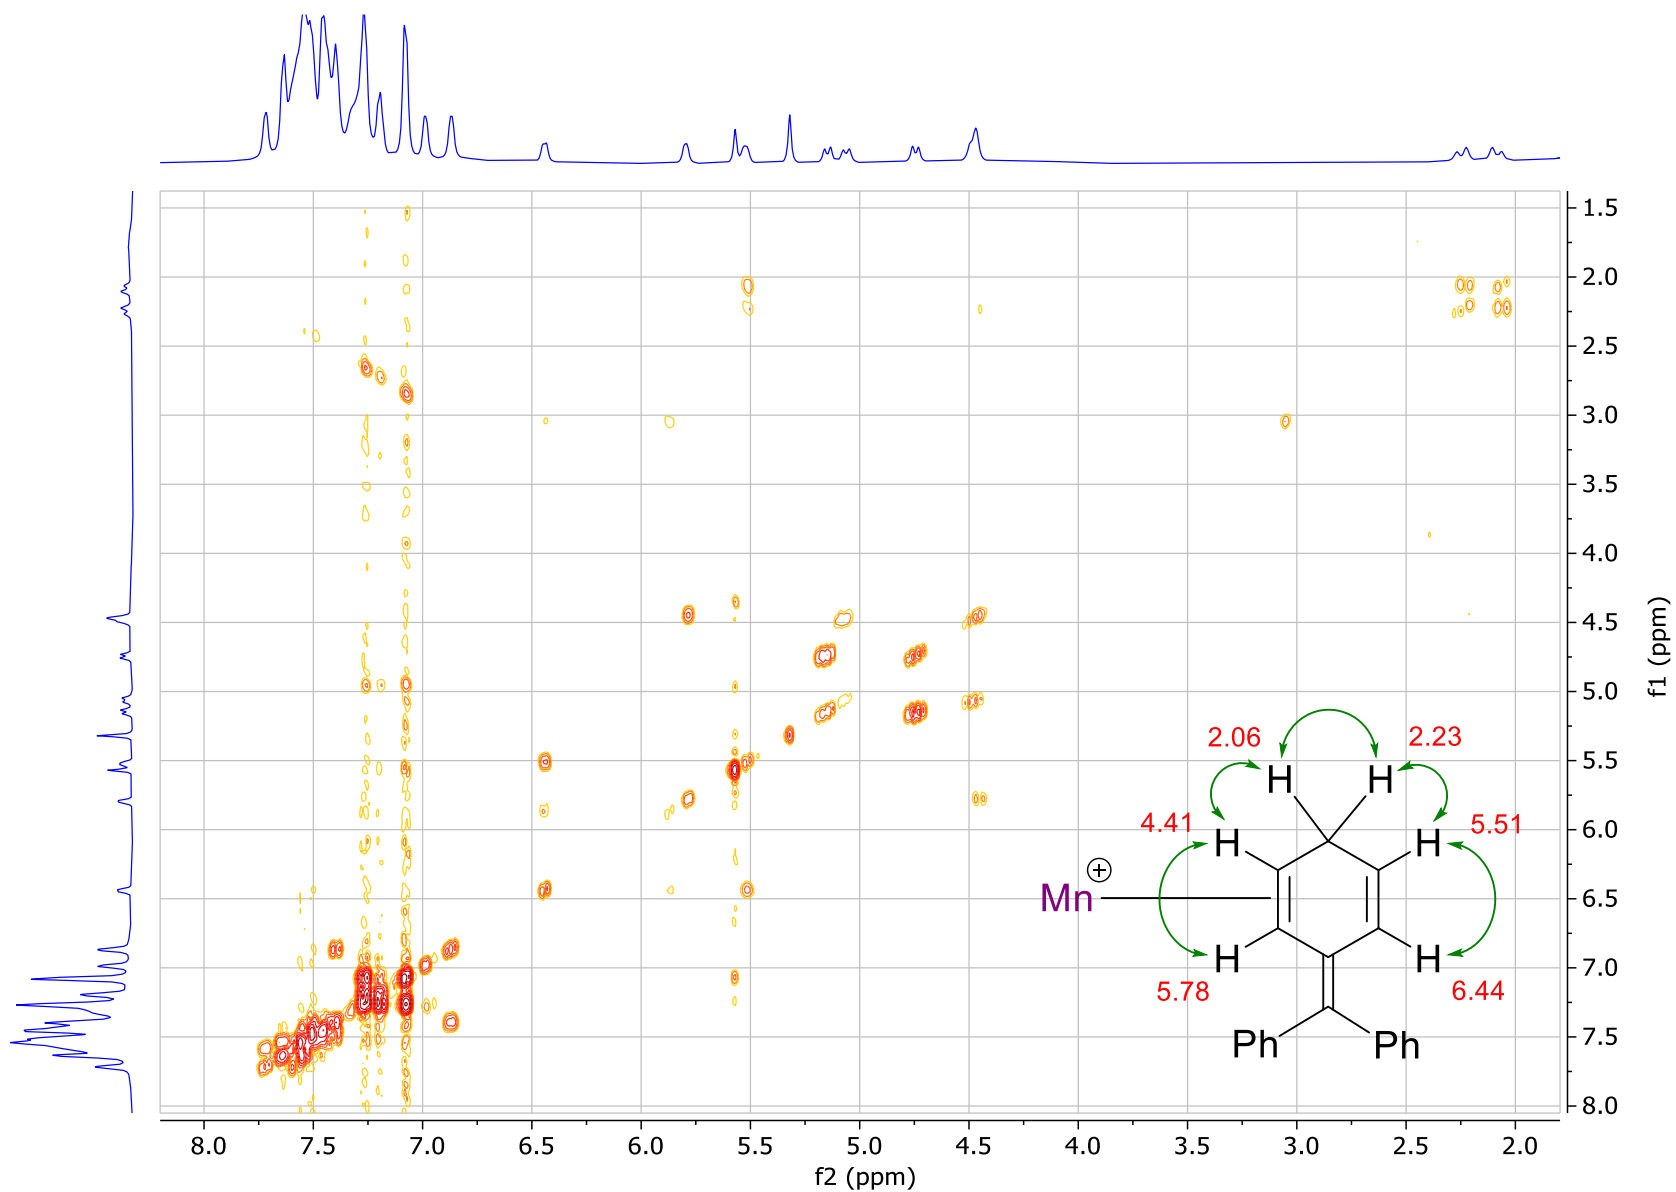

**Figure S19.**  $^1\text{H}$ - $^1\text{H}$  COSY NMR spectrum with  $^{31}\text{P}$  decoupling of the reaction between complex *fac*-1 and  $[\text{Ph}_3\text{C}](\text{B}(\text{C}_6\text{F}_5)_4)$  (600.1 MHz,  $\text{CD}_2\text{Cl}_2$ , 183 K) and correlation scheme in 1,4-cyclohexadiene moiety (chemical shifts are shown in red and the observed correlation between the corresponding protons with green arrows).

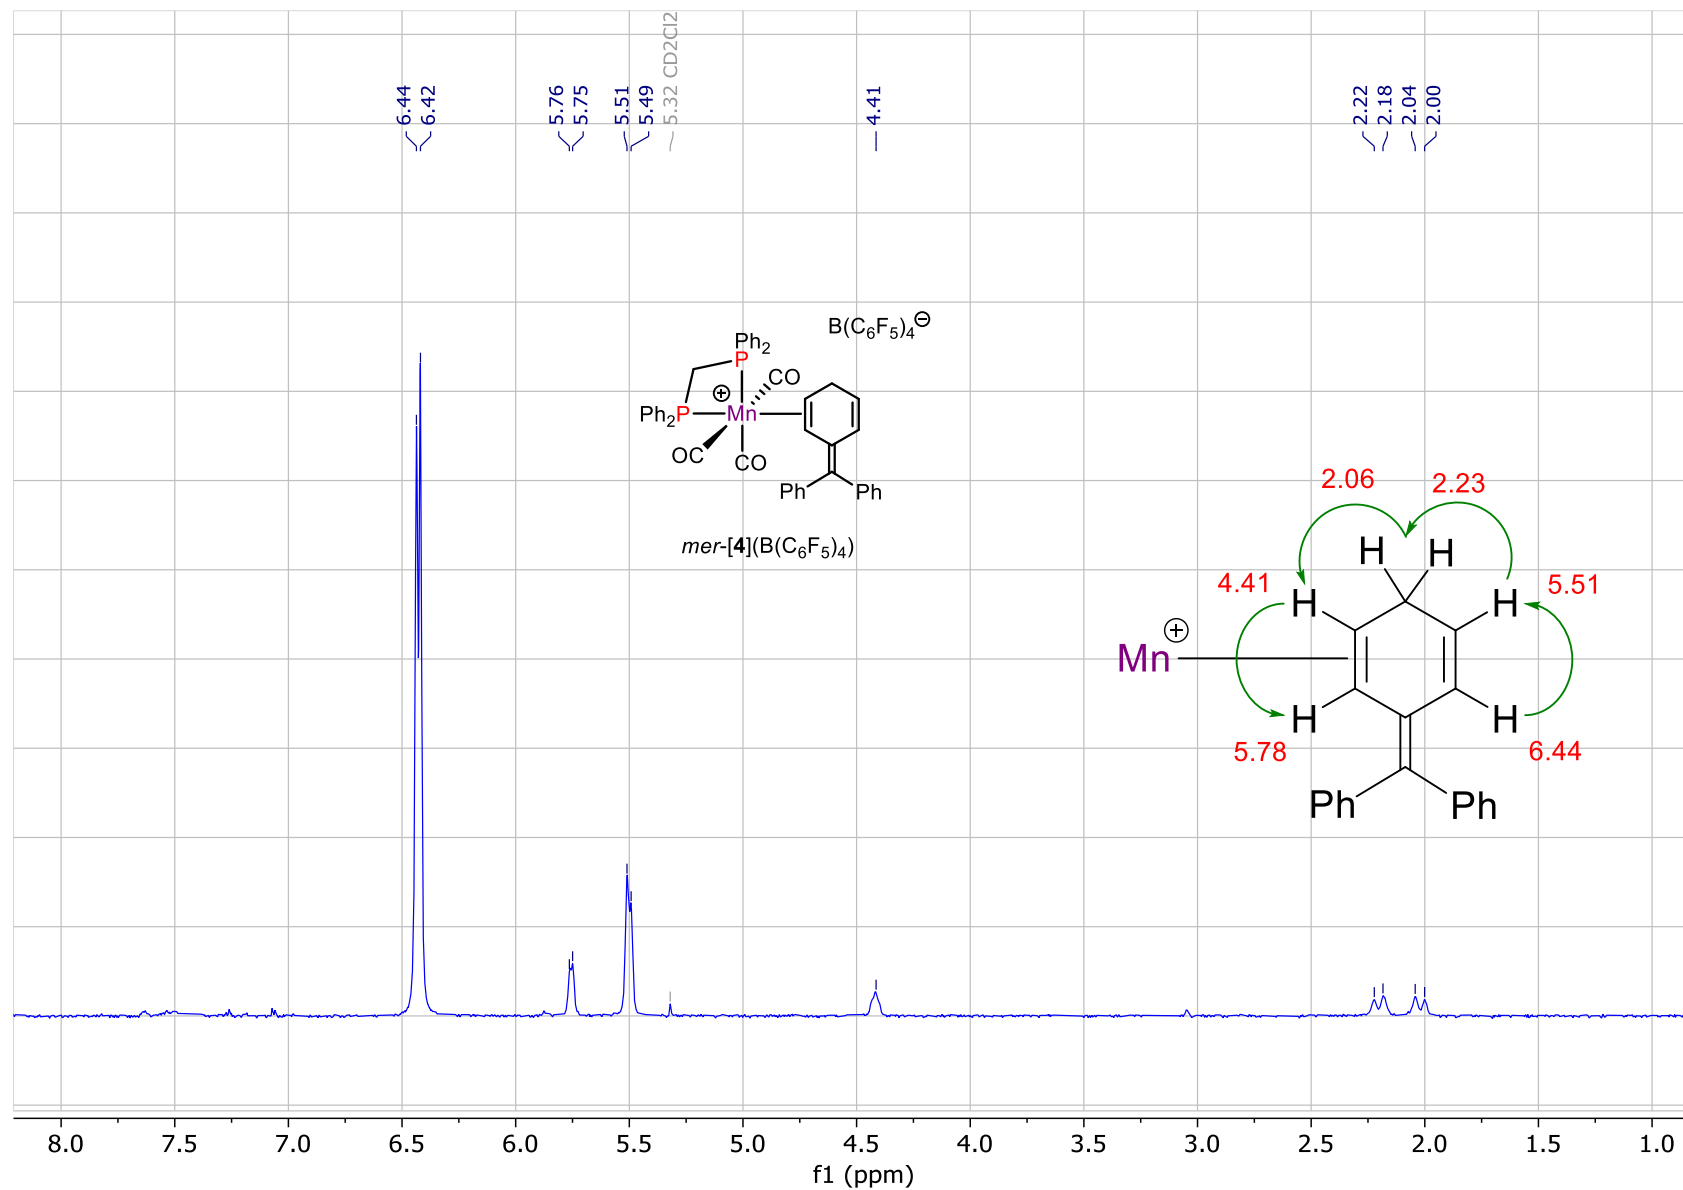

**Figure S20.** 1D <sup>1</sup>H TOCSY spectrum of *mer*-[4](B(C<sub>6</sub>F<sub>5</sub>)<sub>4</sub>) (600.1 MHz, CD<sub>2</sub>Cl<sub>2</sub>, 183 K, irradiated at 6.44 ppm) and proposed scheme of spin transfer (green arrows)

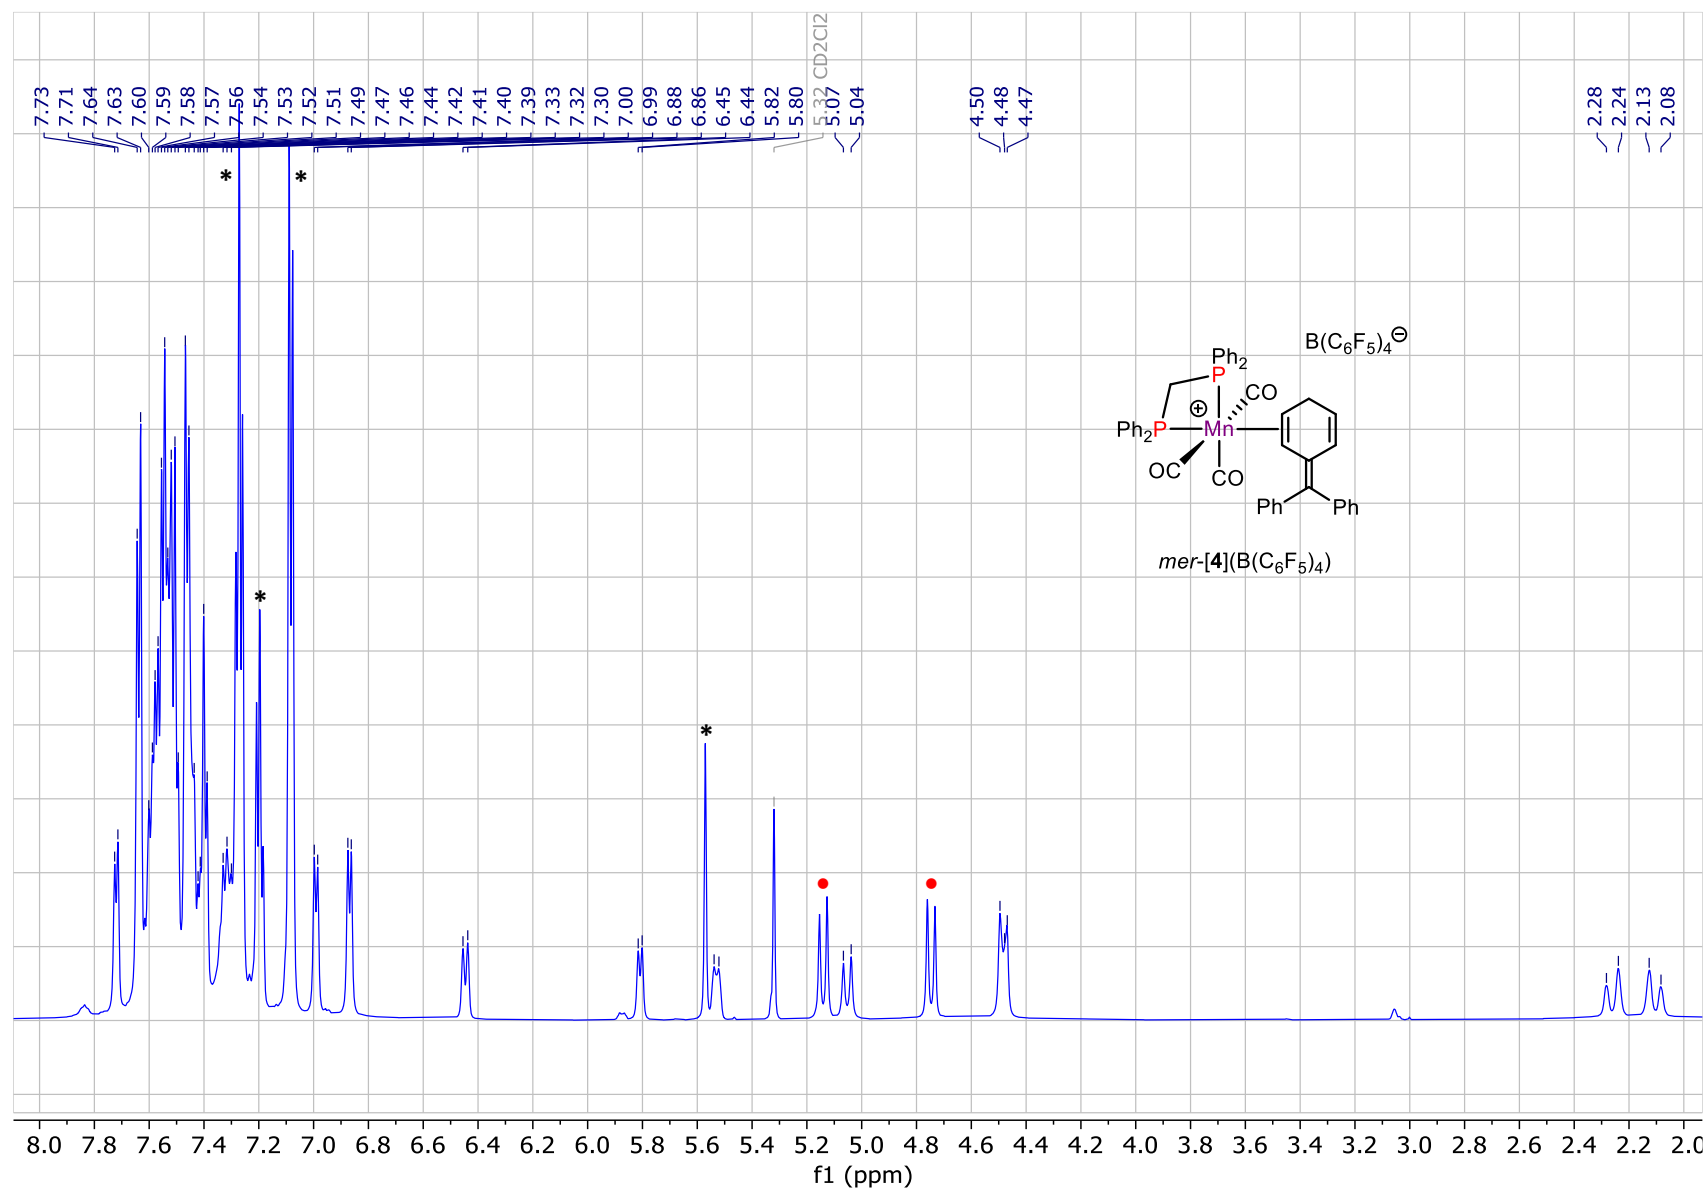

**Figure S21.** Section of  $^1\text{H}\{^{31}\text{P}\}$  NMR spectrum of the reaction between complex *fac*-1 and  $[\text{Ph}_3\text{C}](\text{B}(\text{C}_6\text{F}_5)_4)$  (600.1 MHz,  $\text{CD}_2\text{Cl}_2$ , 183 K), only the signals of *mer*-[4](B(C<sub>6</sub>F<sub>5</sub>)<sub>4</sub>) are identified. The signals of non-coordinated  $\text{Ph}_3\text{CH}$  are marked with asterisk, and those of *fac*-[3](B(C<sub>6</sub>F<sub>5</sub>)<sub>4</sub>) with red dots.



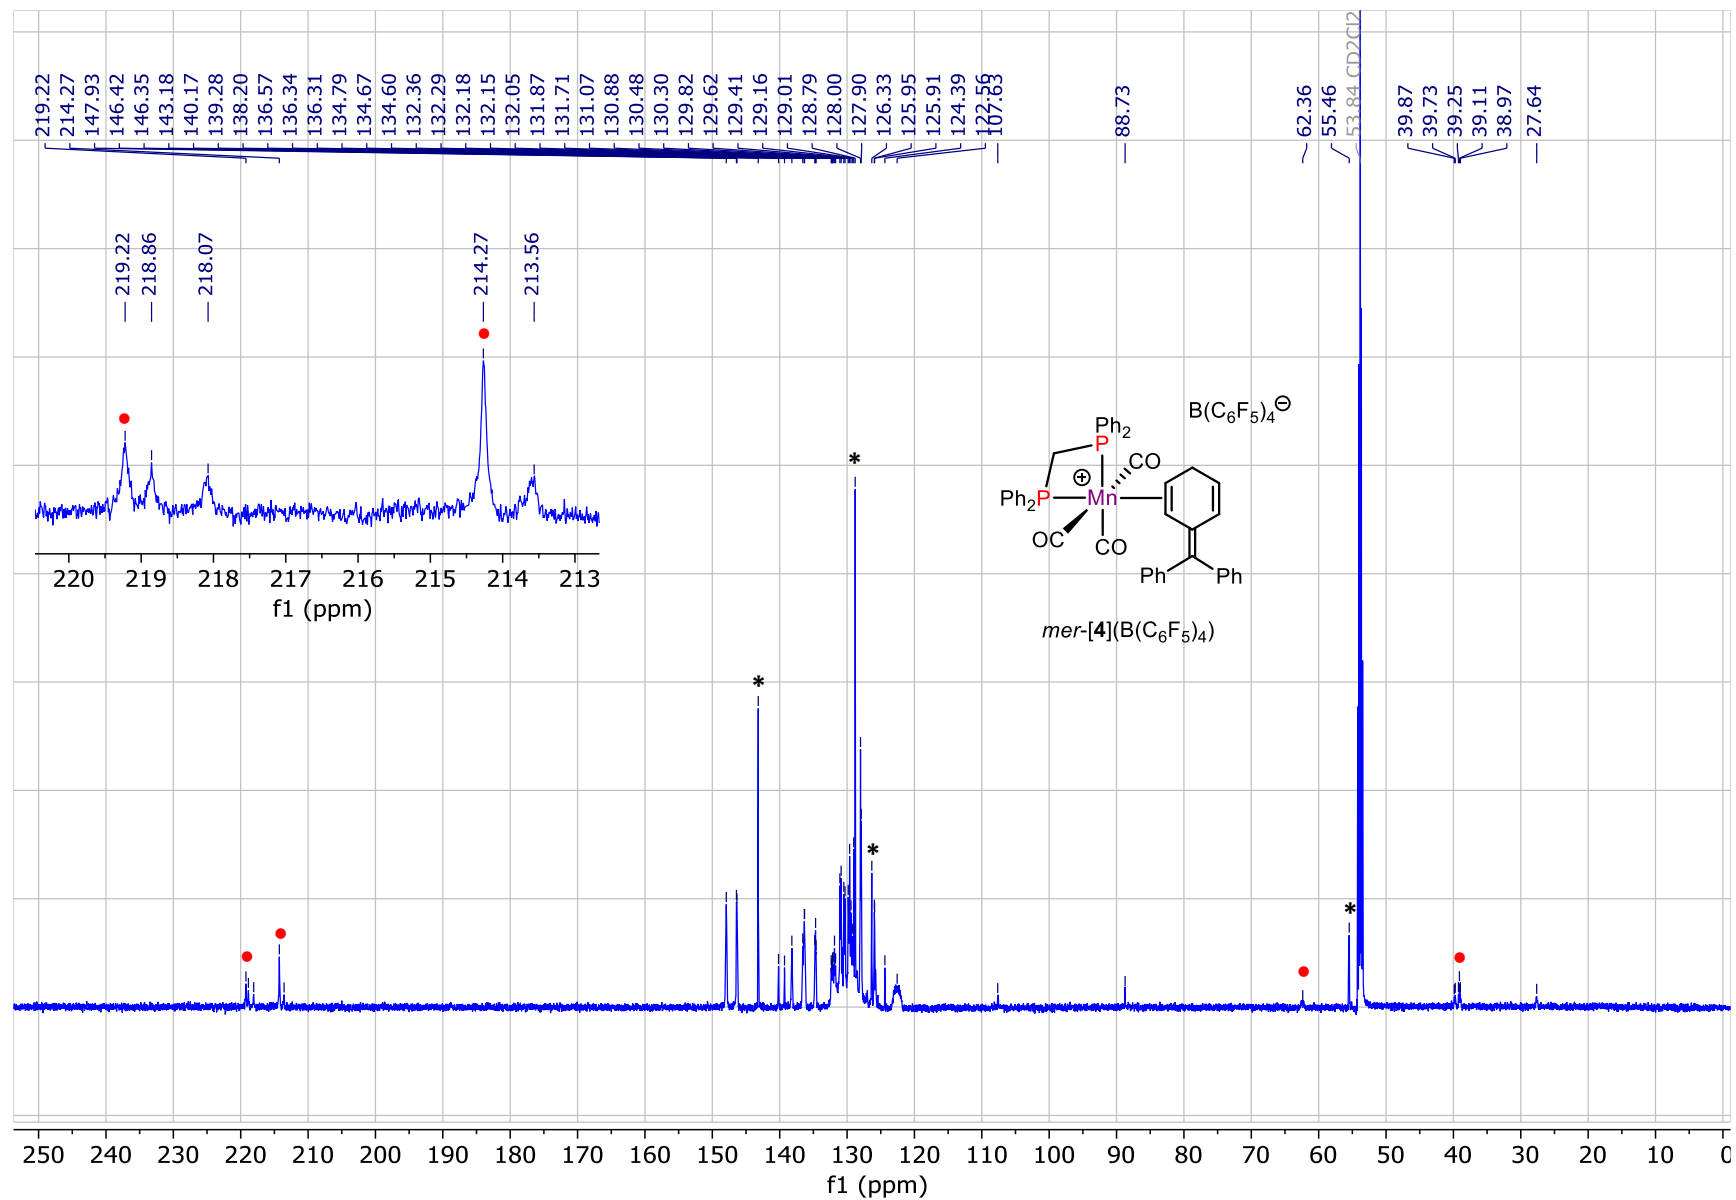

**Figure S22.**  $^{13}\text{C}\{^1\text{H}\}$  NMR spectrum of mixture of  $mer\text{-}[4](\text{B}(\text{C}_6\text{F}_5)_4)$  and  $fac\text{-}[3](\text{B}(\text{C}_6\text{F}_5)_4)$  at 183 K (150.9 MHz,  $\text{CD}_2\text{Cl}_2$ , 183 K), the signals of triphenylmethane are marked with asterisk, and those of  $fac\text{-}[3](\text{B}(\text{C}_6\text{F}_5)_4)$  with red dots.

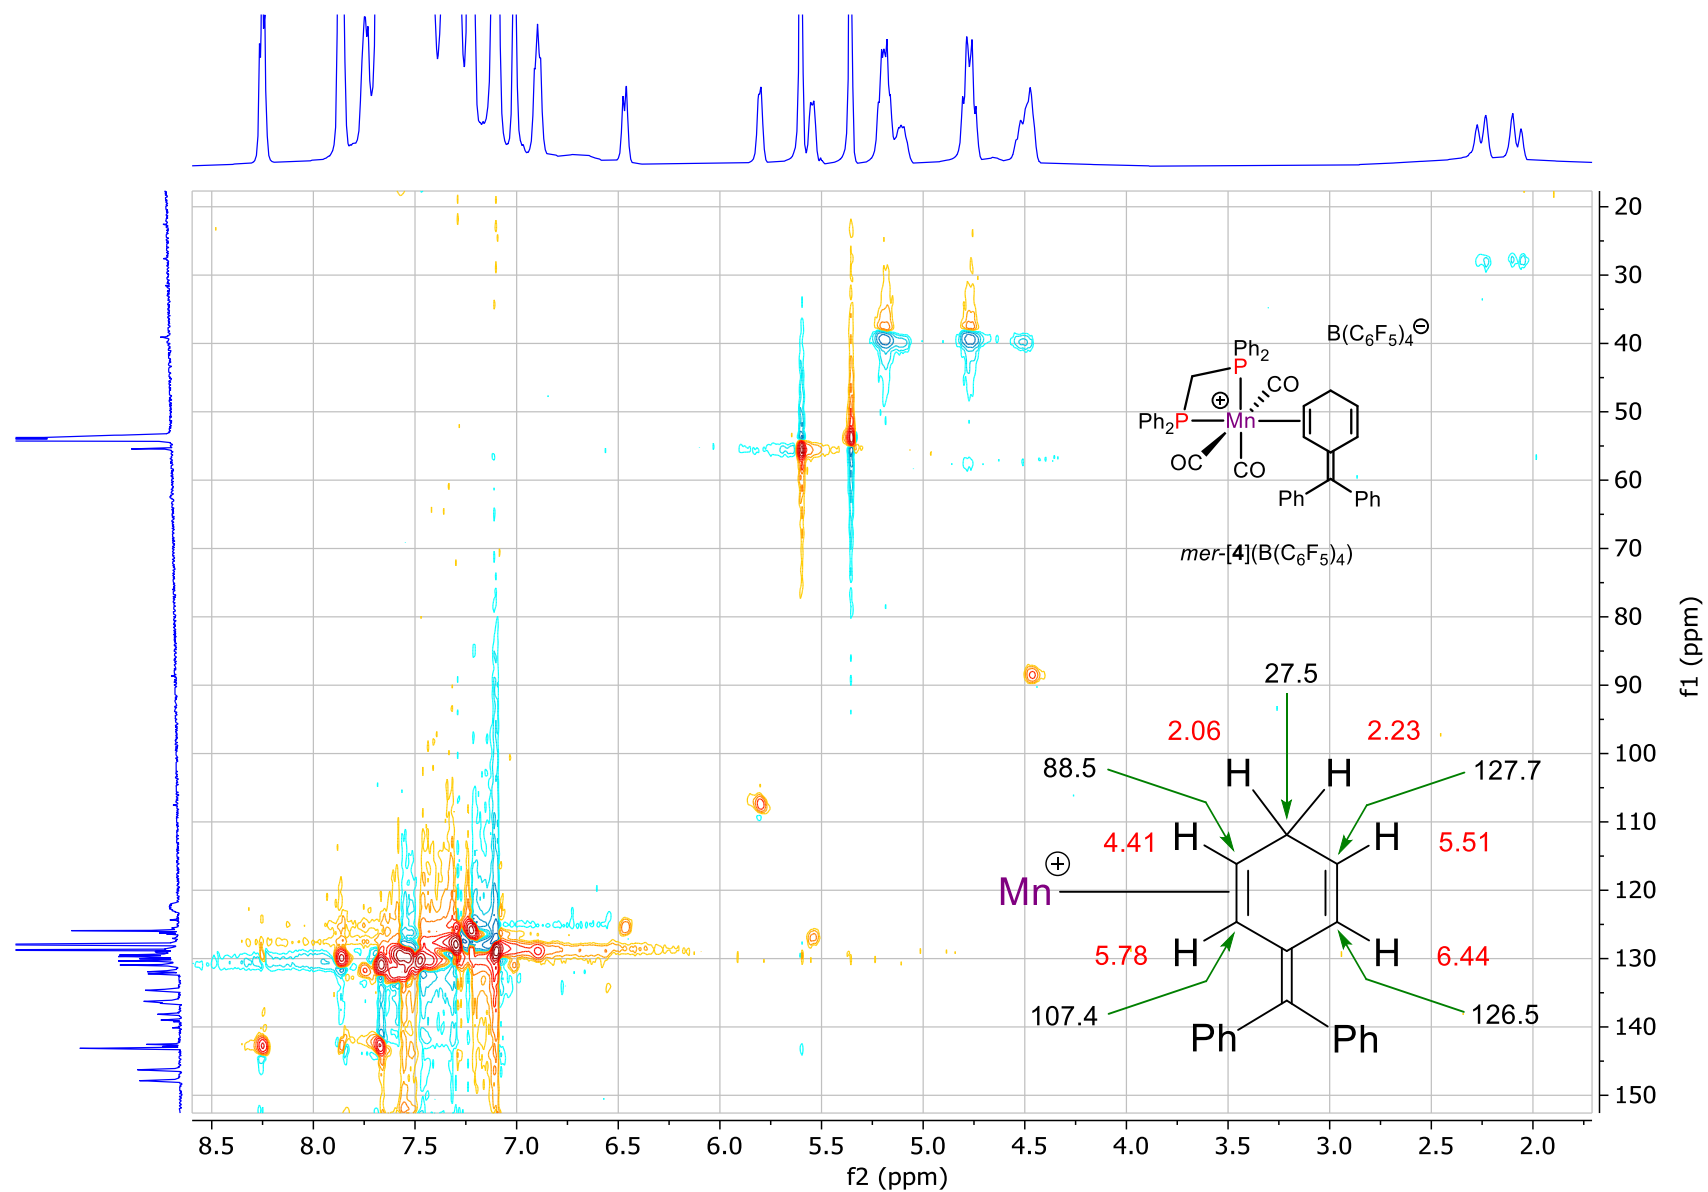

**Figure S23.**  $^{13}C$ - $^1H$  HSQC NMR spectrum for the mixture of *mer*-[4]( $B(C_6F_5)_4$ ) and *fac*-[3]( $B(C_6F_5)_4$ ) at 183 K (150.9 MHz,  $CD_2Cl_2$ , 183 K, cross-peaks for CH and  $CH_2$  fragments are shown in red and blue, respectively) and correlation scheme in 1,4-cyclohexadiene moiety.

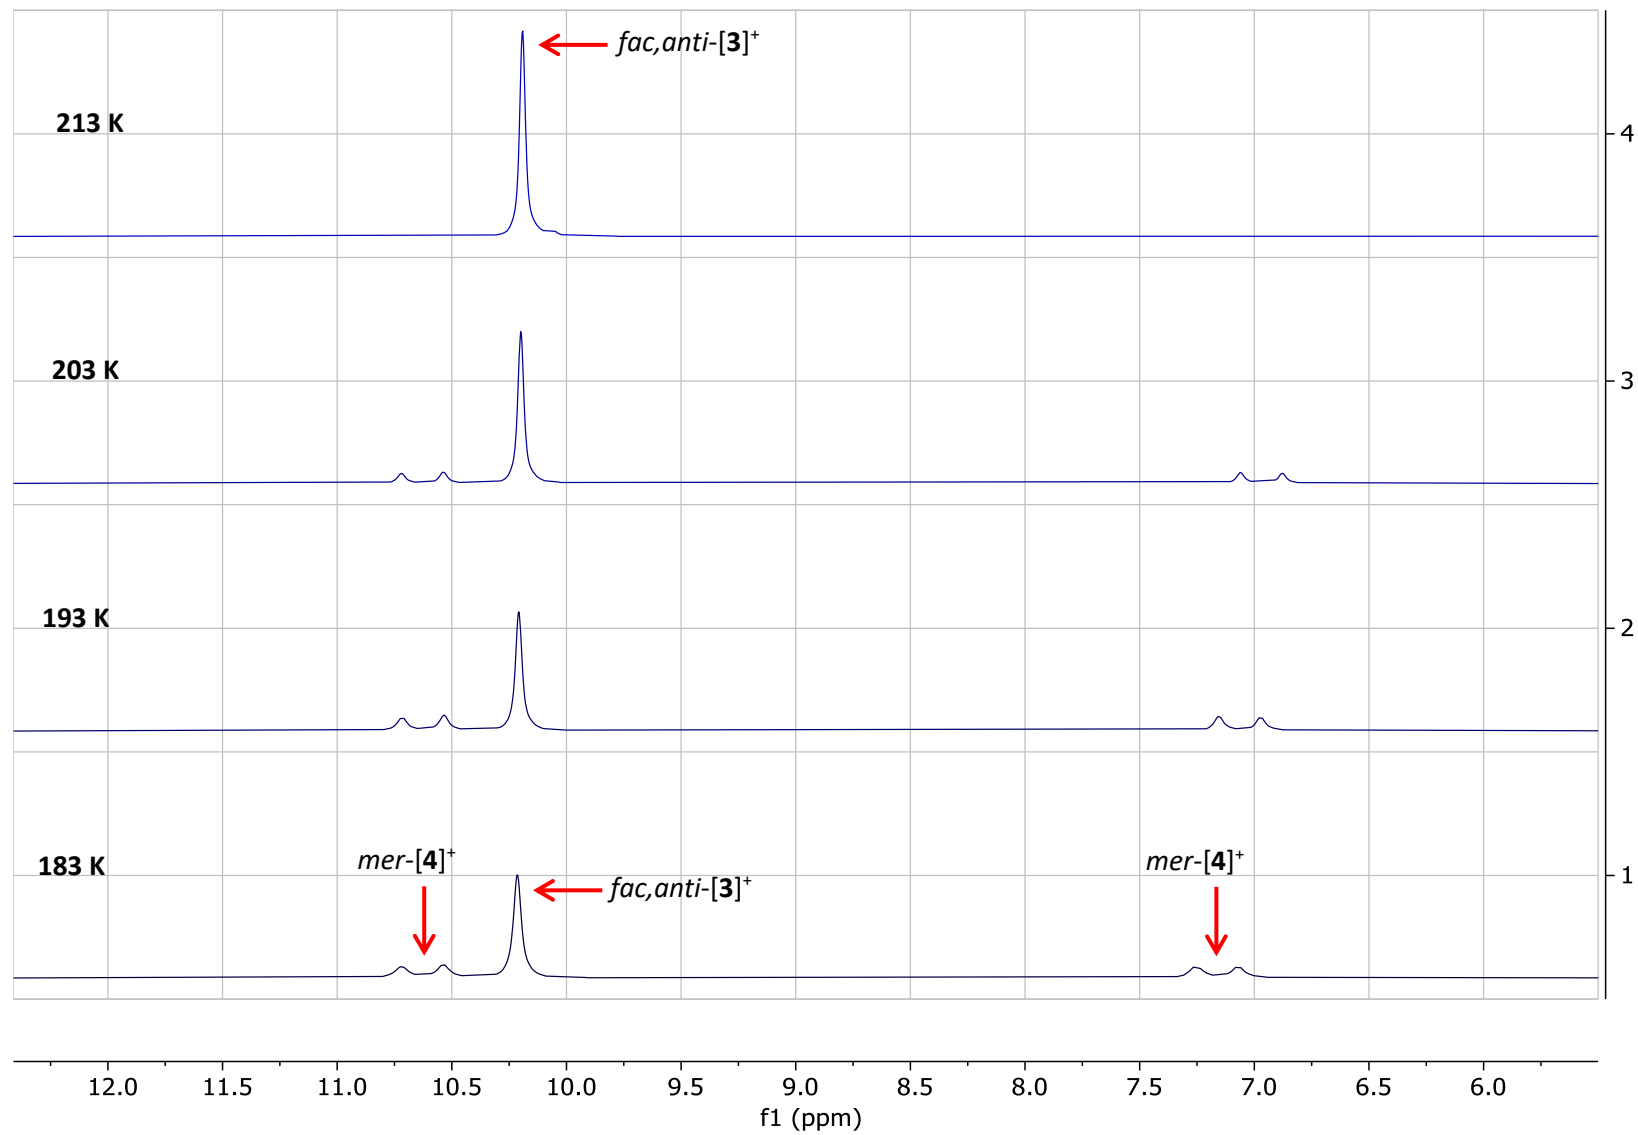

**Figure S24.**  $^{31}\text{P}\{^1\text{H}\}$  NMR monitoring of the reaction between  $fac-1$  and  $[\text{Ph}_3\text{C}](\text{B}(\text{C}_6\text{F}_5)_4)$  in 183-213 K temperature range (243 MHz,  $\text{CD}_2\text{Cl}_2$ ).

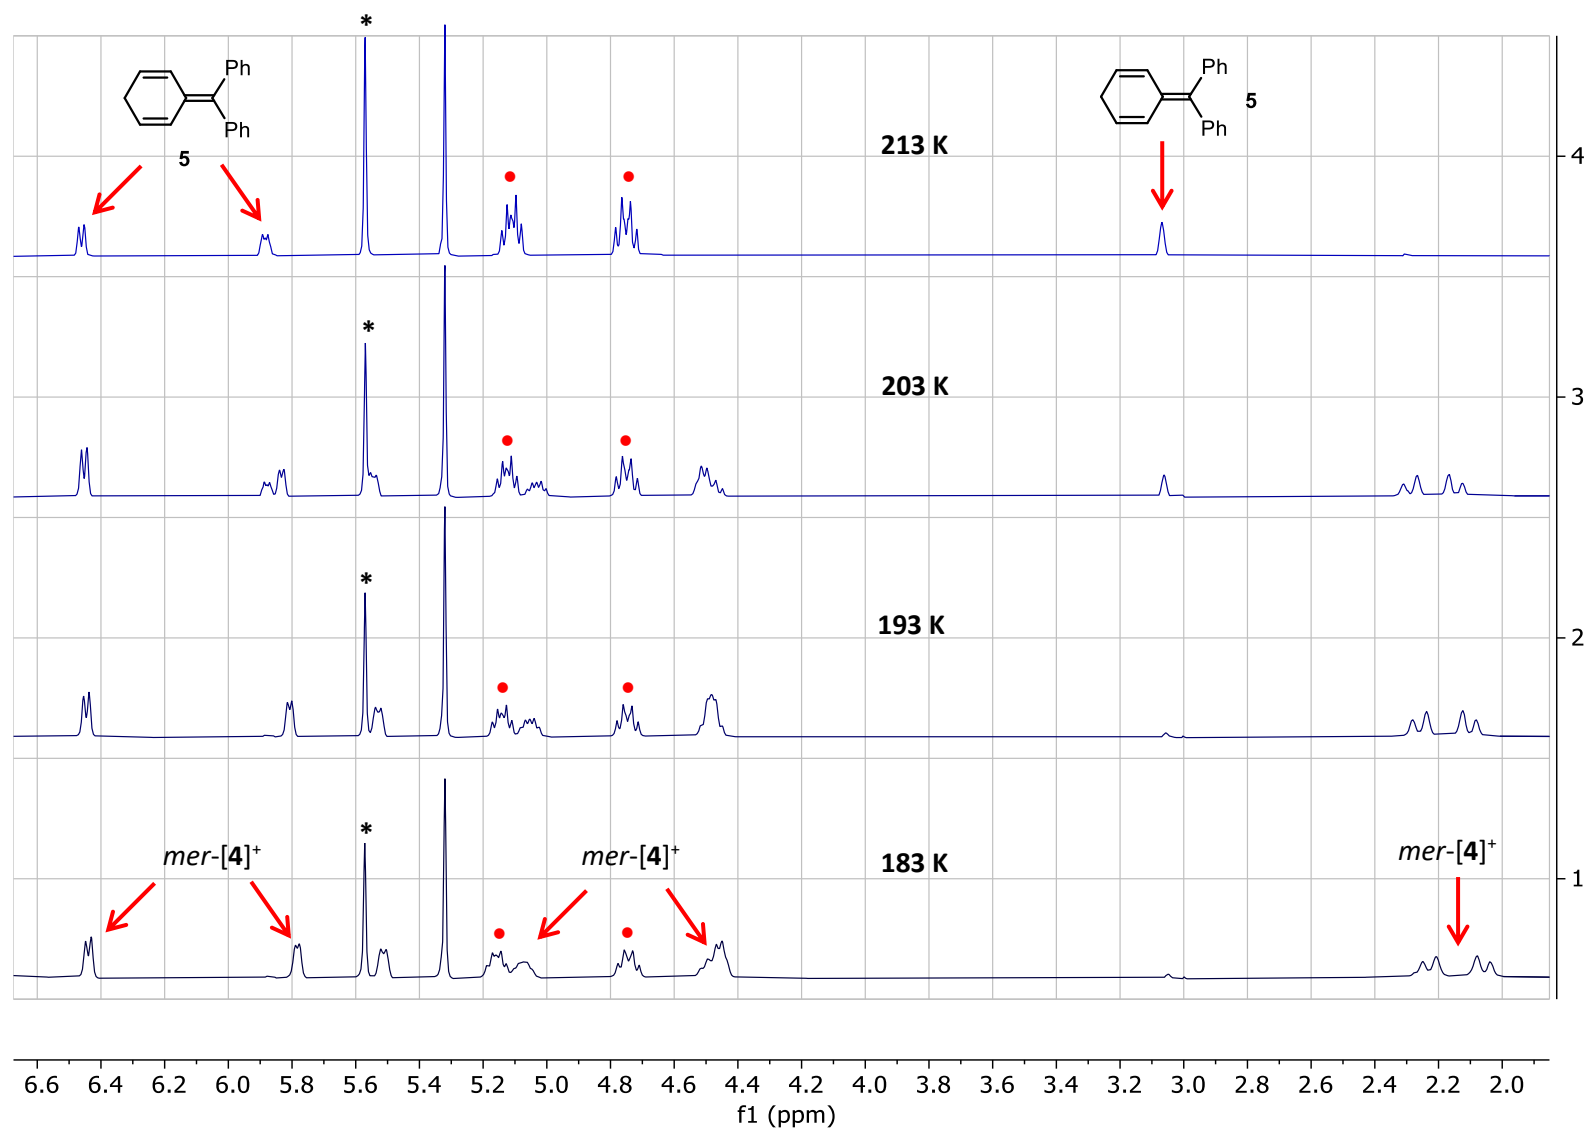

**Figure S25.** Section of  $^1\text{H}$  NMR spectra (600.1 MHz,  $\text{CD}_2\text{Cl}_2$ ) in 183-213 K temperature range illustrating the transformation of  $\text{mer-[4](B(C}_6\text{F}_5)_4)$  into  $\text{fac-[3](B(C}_6\text{F}_5)_4)$  and cyclic diene **5**, the signals of triphenylmethane are marked with asterisk, and those of  $\text{fac-[3](B(C}_6\text{F}_5)_4)$  are marked with red dots.

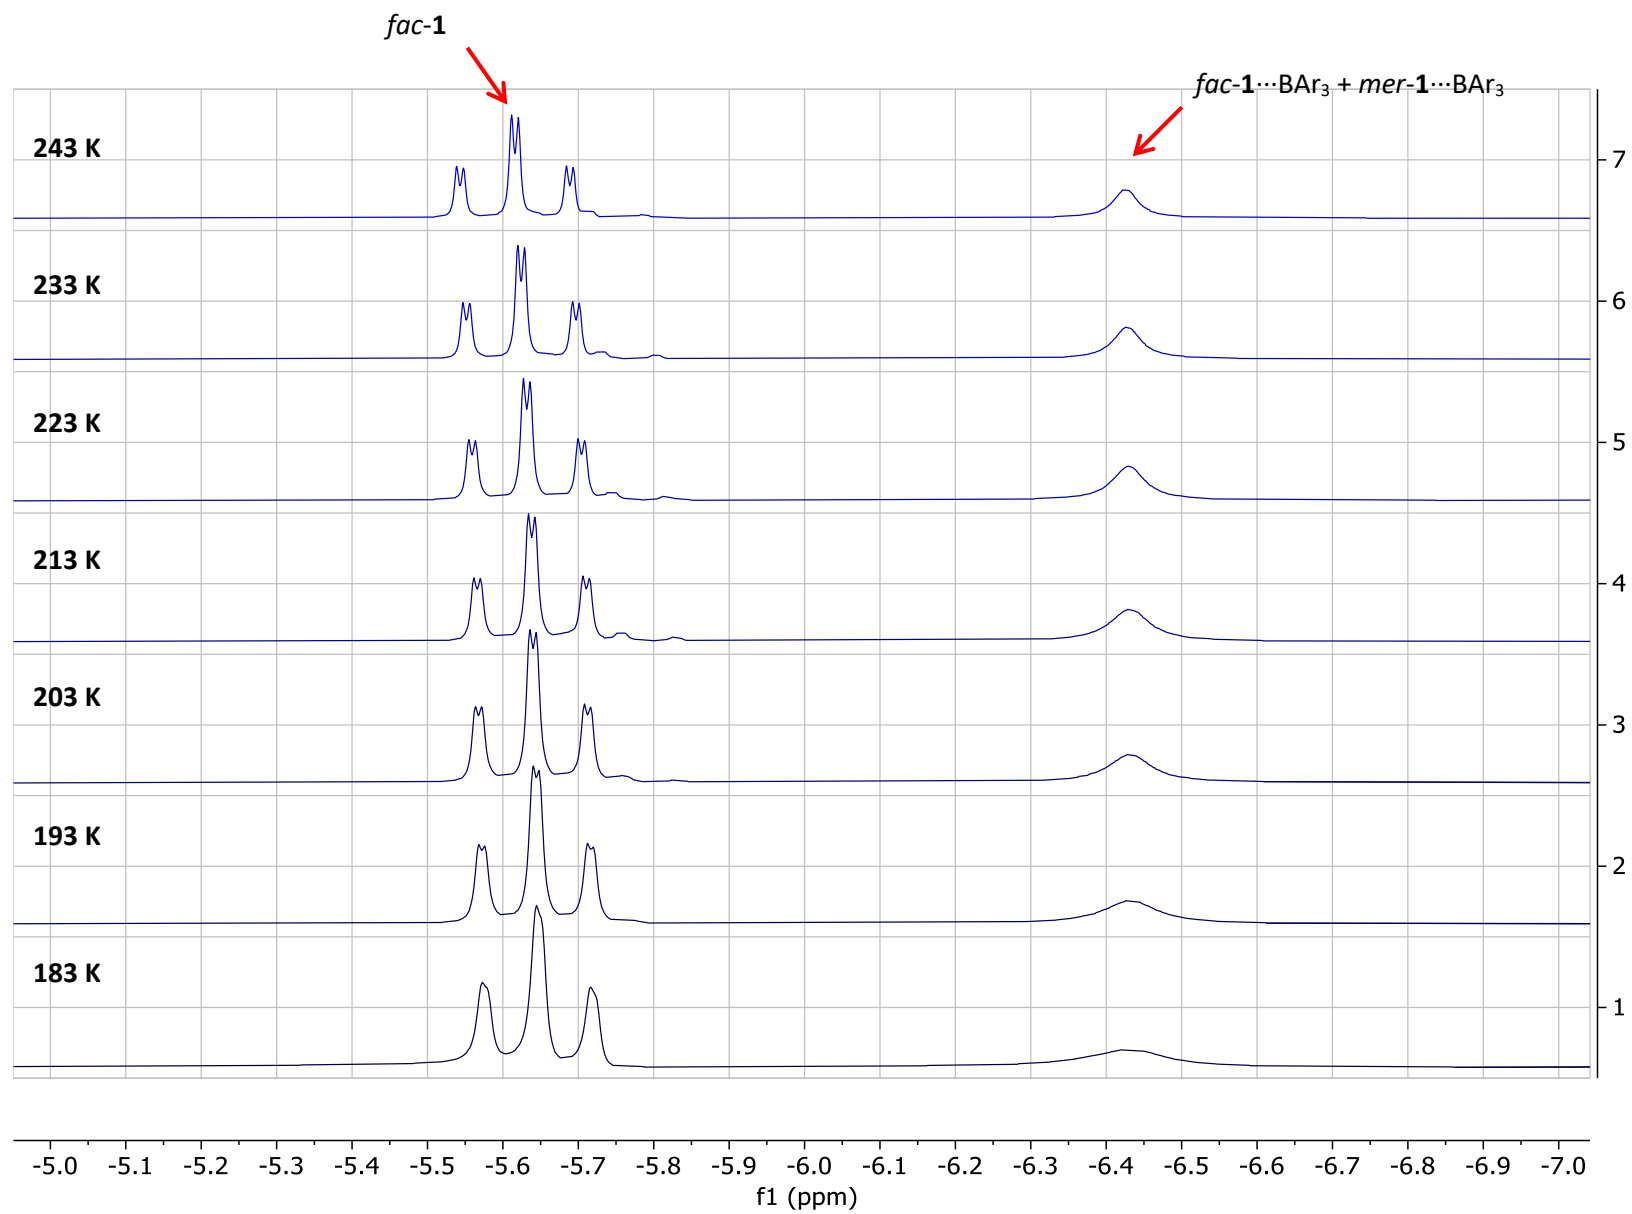

**Figure S26.**  $^1\text{H}$  NMR monitoring of the reaction between *fac-1* and  $\text{B}(\text{C}_6\text{F}_5)_3$  in 183-243 K temperature range in hydride signals region (600.1 MHz,  $\text{CD}_2\text{Cl}_2$ ).

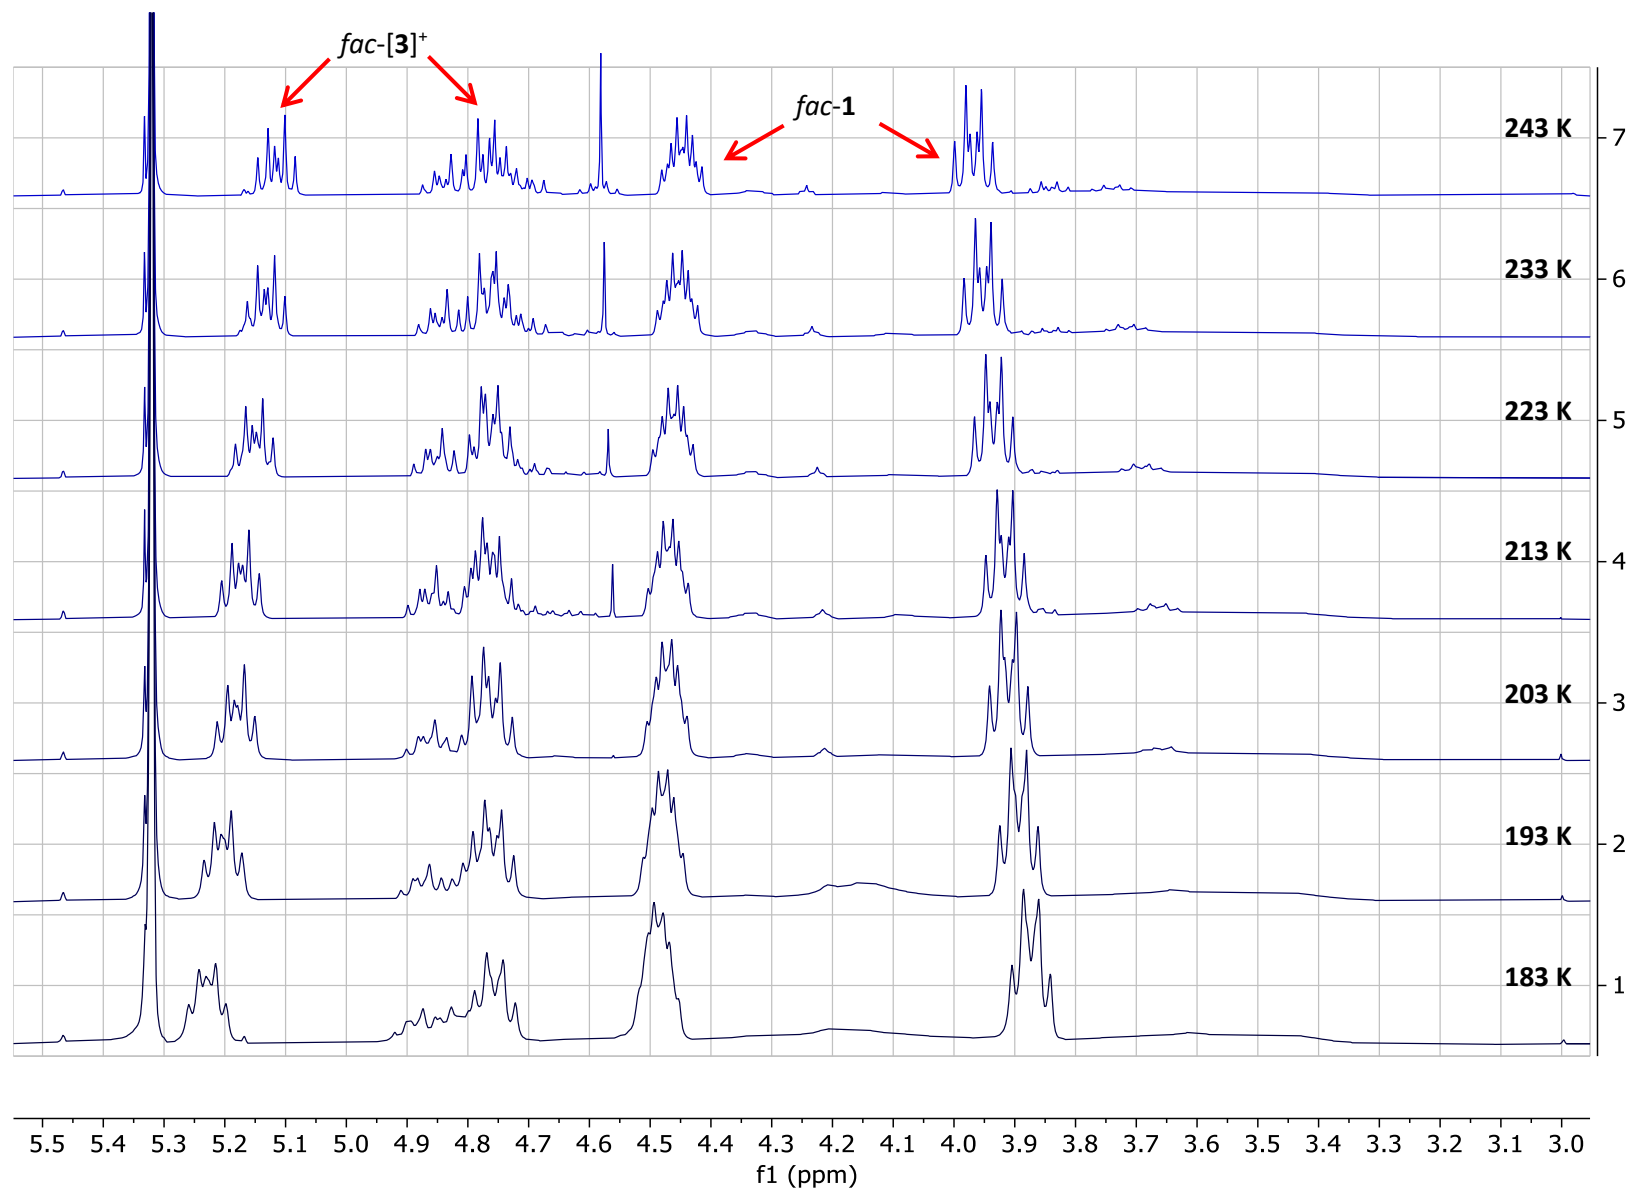

**Figure S27.** <sup>1</sup>H NMR monitoring of the reaction between *fac-1* and B(C<sub>6</sub>F<sub>5</sub>)<sub>3</sub> in 183-243 K temperature range in PCH<sub>2</sub>P signals region (600.1 MHz, CD<sub>2</sub>Cl<sub>2</sub>).

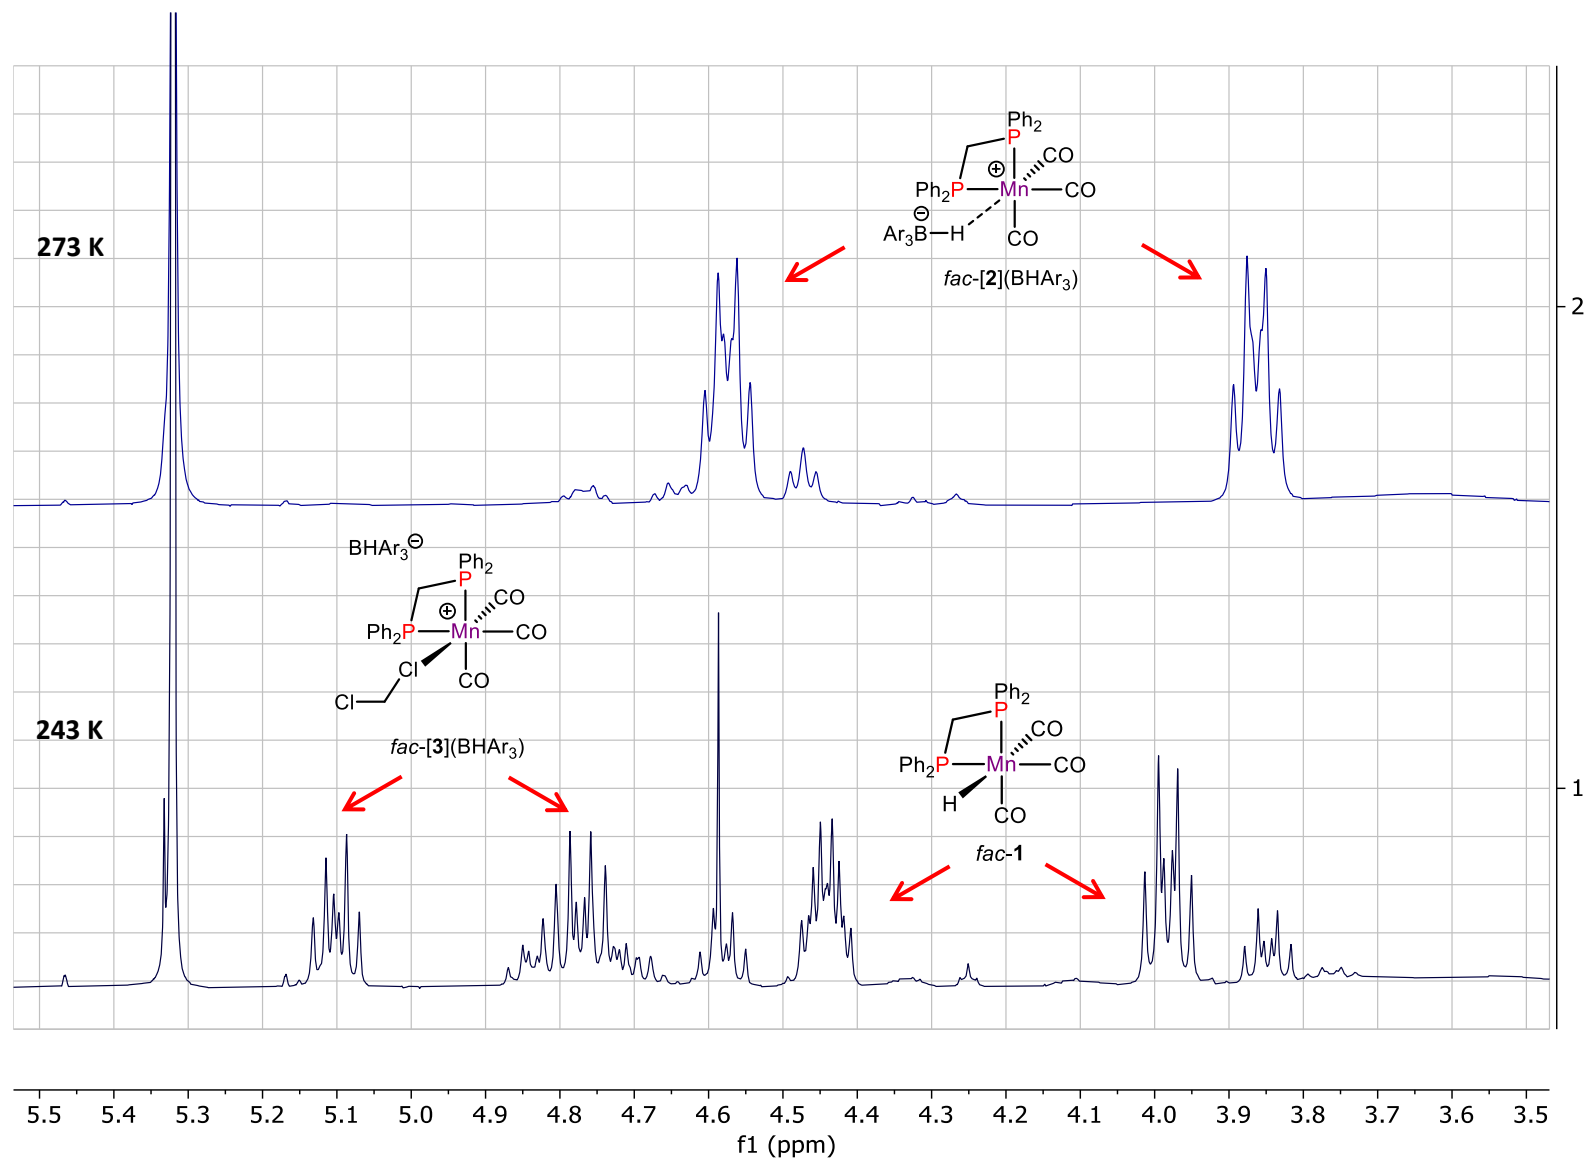

**Figure S28.** Superposition of <sup>1</sup>H NMR spectra of the reaction between *fac*-1 and B(C<sub>6</sub>F<sub>5</sub>)<sub>3</sub> at 243 and 273 K in PCH<sub>2</sub>P signals region illustrating the transformation of *fac*-[3](BHPPh<sub>3</sub>) into *fac*-[2](BHPPh<sub>3</sub>) (600.1 MHz, CD<sub>2</sub>Cl<sub>2</sub>).

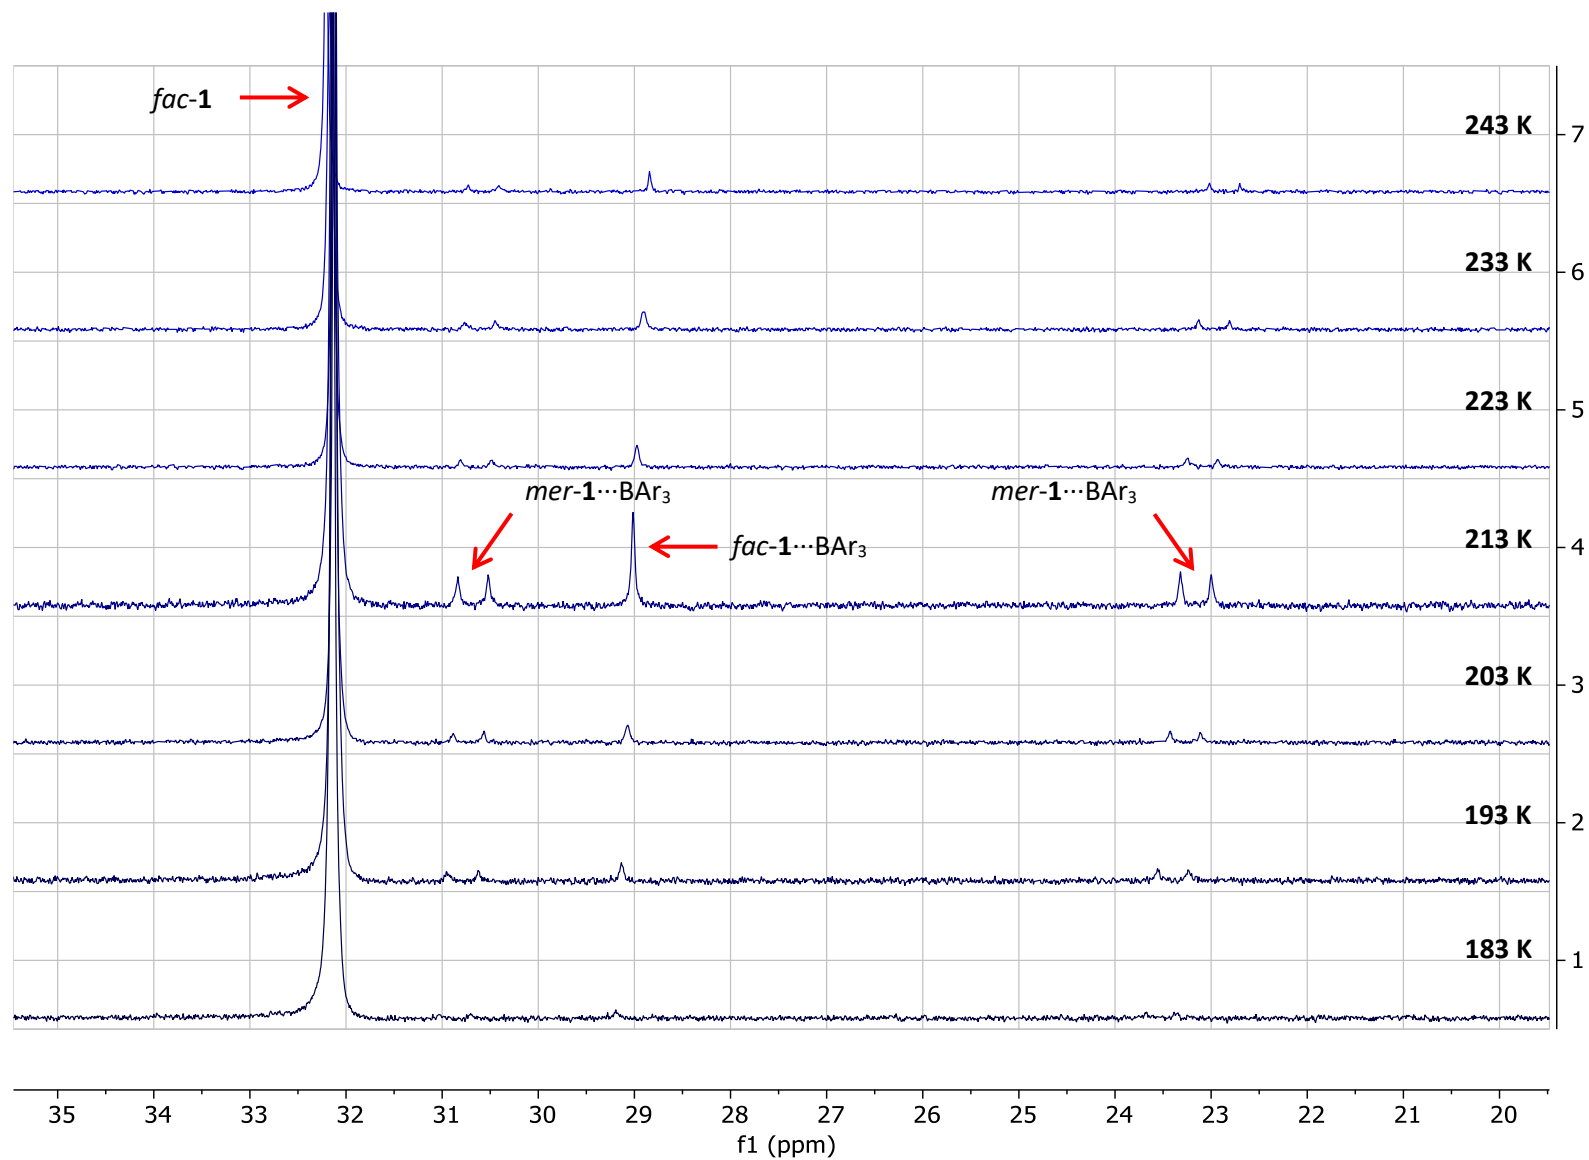

**Figure S29.** Section of  $^{31}\text{P}\{^1\text{H}\}$  NMR spectra of the reaction between *fac-1* and  $\text{B}(\text{C}_6\text{F}_5)_3$  in 183-243 K temperature range illustrating the formation of non-covalent adducts *fac-1*... $\text{BAr}_3$  and *mer-1*... $\text{BAr}_3$ .



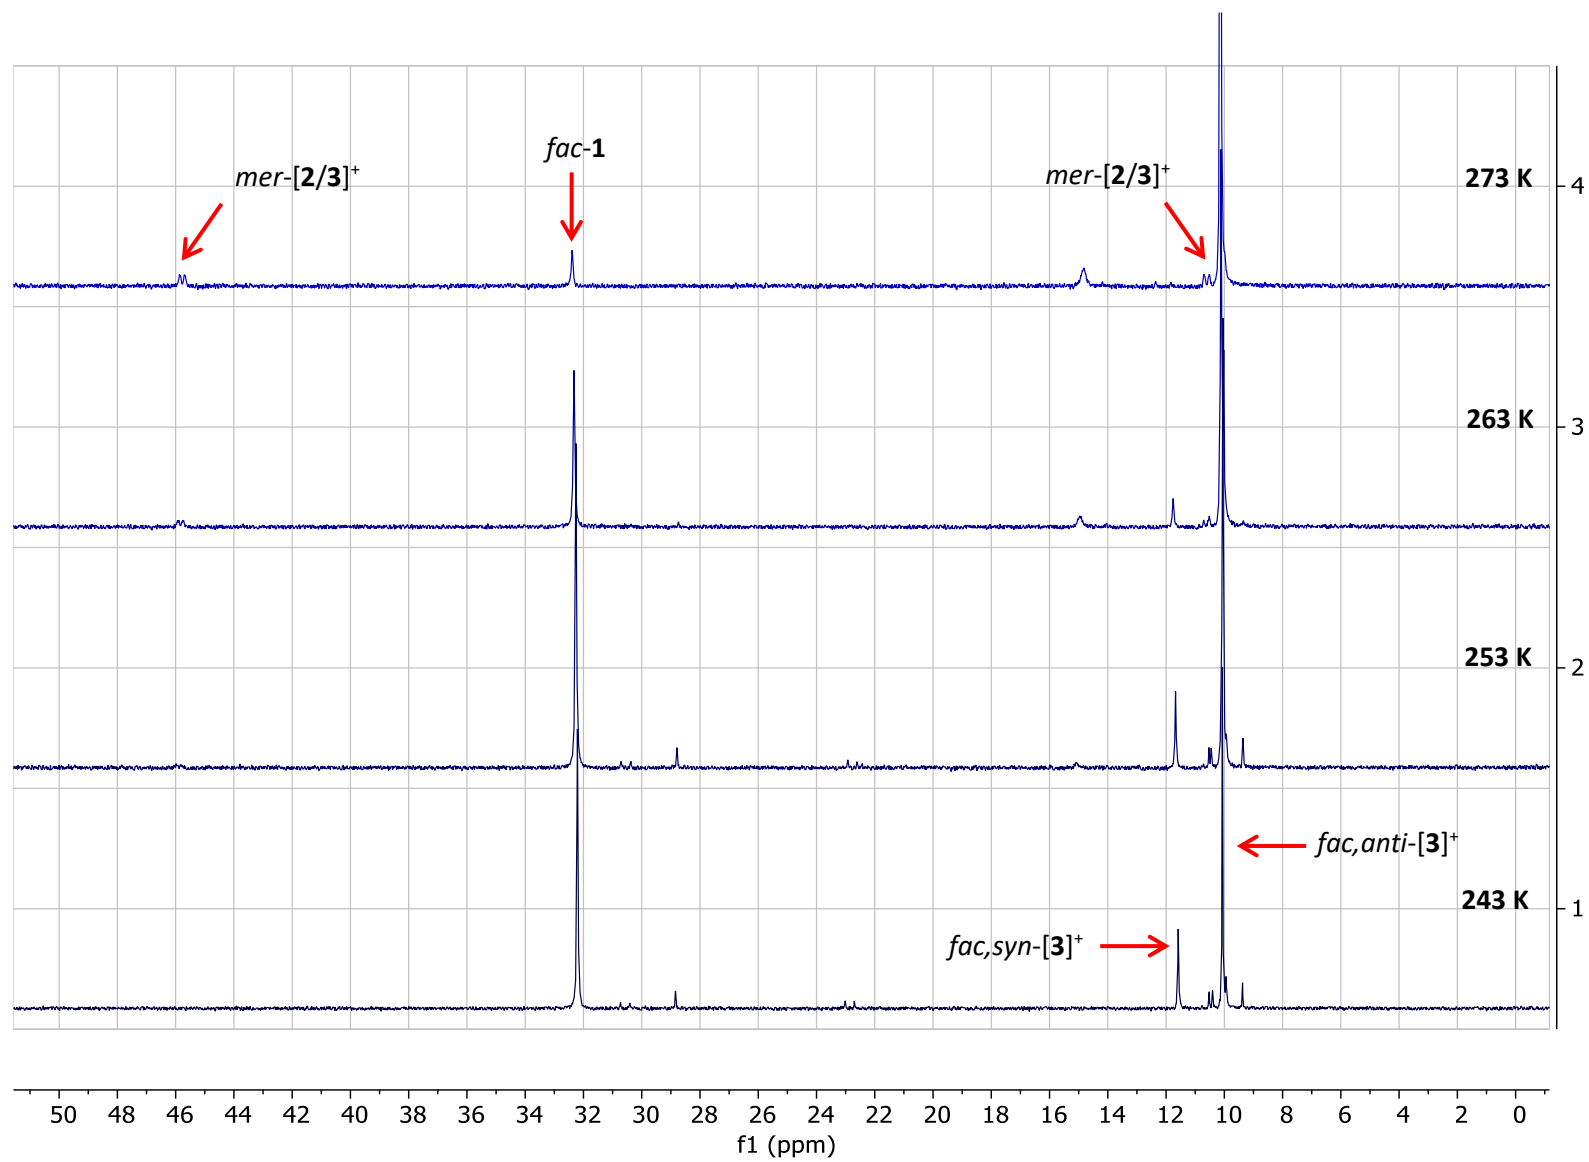

**Figure S30.** Section of  $^{31}\text{P}\{^1\text{H}\}$  NMR spectra of the reaction between *fac-1* and  $\text{B}(\text{C}_6\text{F}_5)_3$  in 243-273 K temperature range illustrating the formation of meridional cationic species  $mer-[3](\text{B}(\text{H}Ar)_3)$  and/or  $mer-[2](\text{B}(\text{H}Ar)_3)$ .

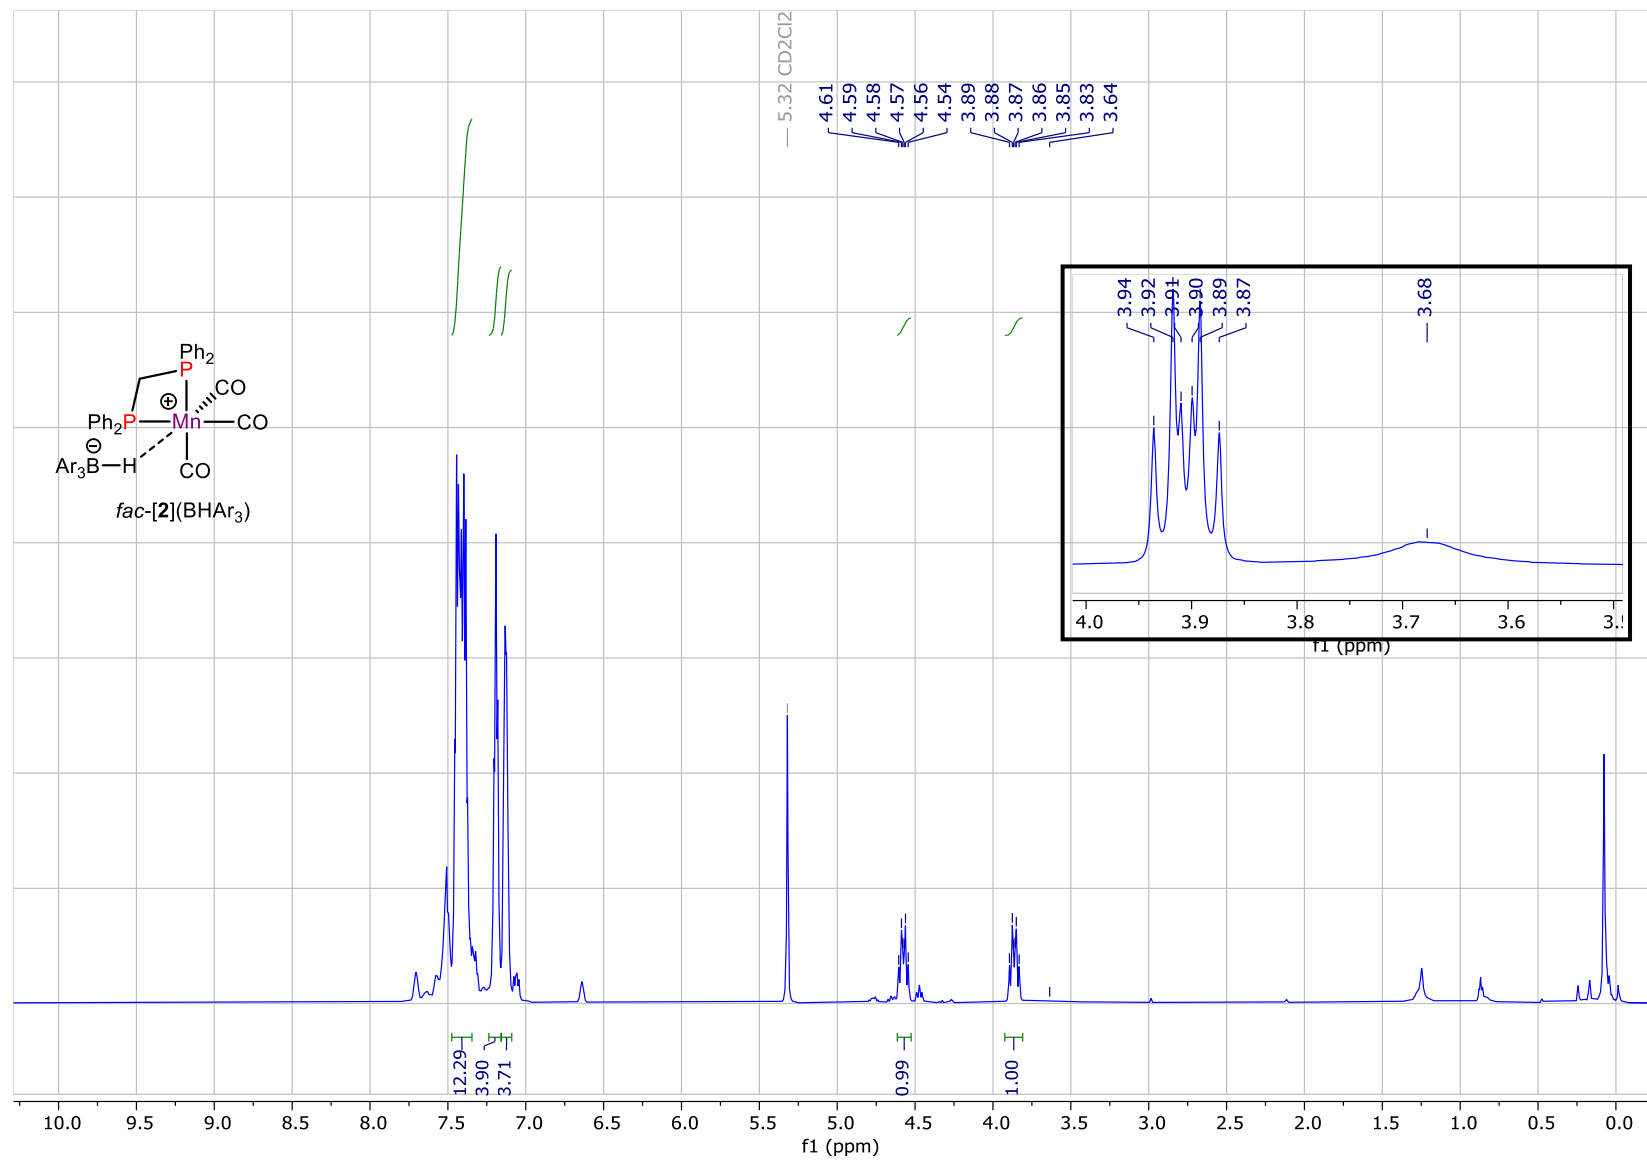

**Figure S31.**  $^1\text{H}$  NMR spectrum of complex  $\text{fac-[2](BAr}_3\text{)}$  (600.1 MHz,  $\text{CD}_2\text{Cl}_2$ , 273 K), inset correspond to the section of  $^1\text{H}\{^{11}\text{B}\}$  NMR spectrum evidencing broad signal of the B-H moiety coordinated to the metal atom.

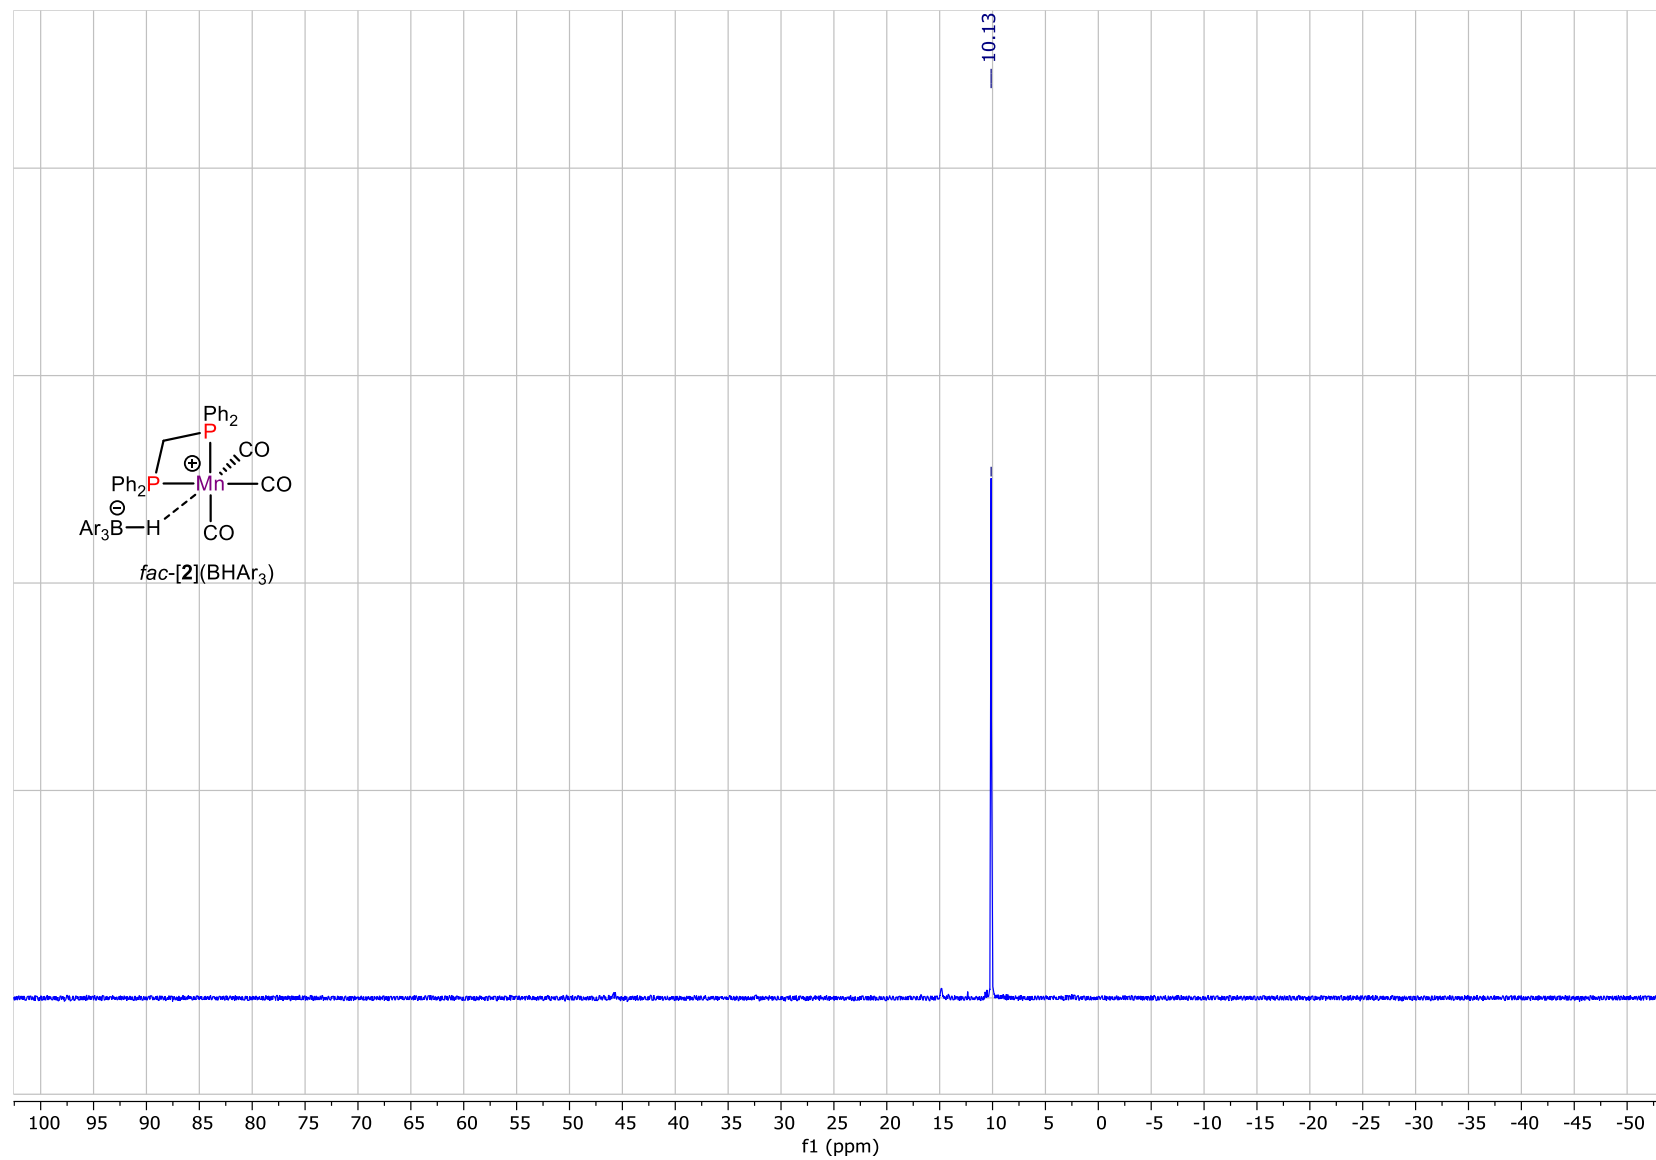

**Figure S32.**  $^{31}\text{P}\{^1\text{H}\}$  NMR spectrum of complex  $\text{fac-}[\mathbf{2}](\text{BAr}_3)$  (243.0 MHz,  $\text{CD}_2\text{Cl}_2$ , 273 K).

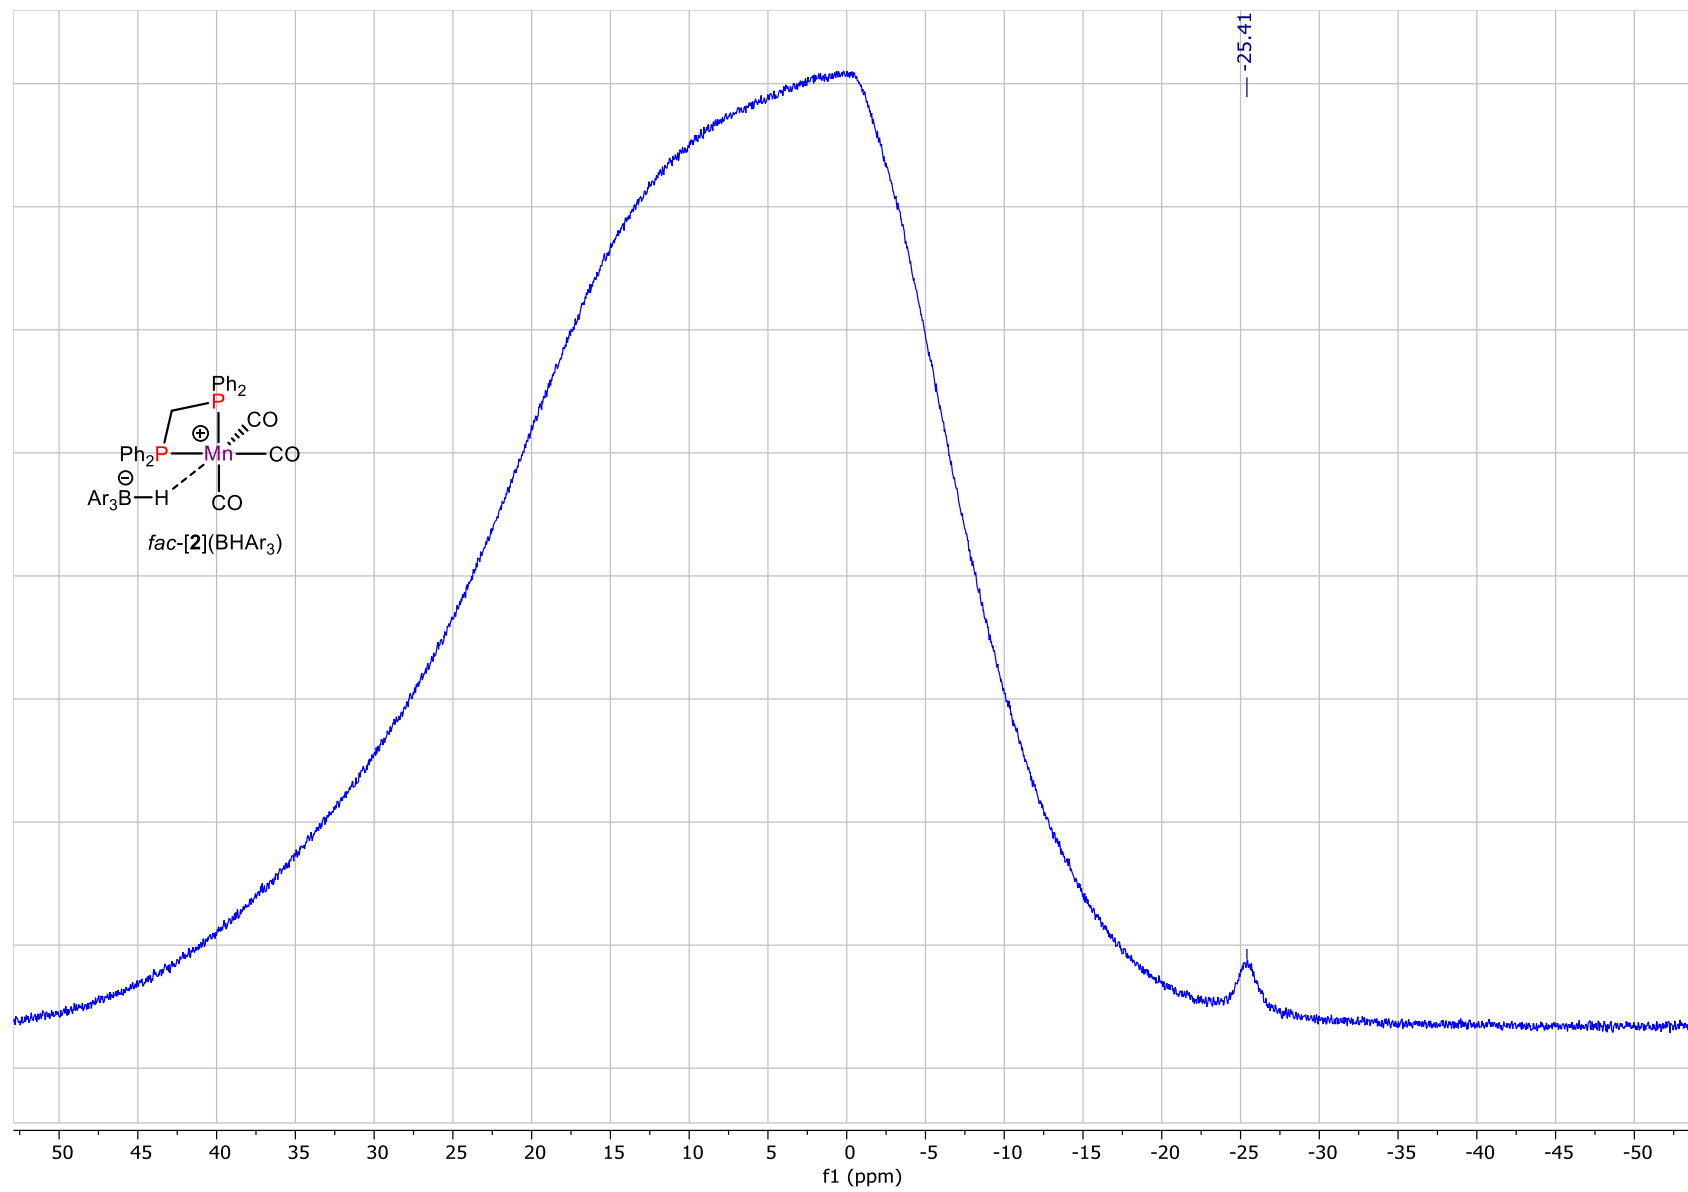

**Figure S33.**  $^{11}\text{B}$  NMR spectrum of complex  $\text{fac-}[2](\text{BAr}_3)$  (192.5 MHz,  $\text{CD}_2\text{Cl}_2$ , 273 K).

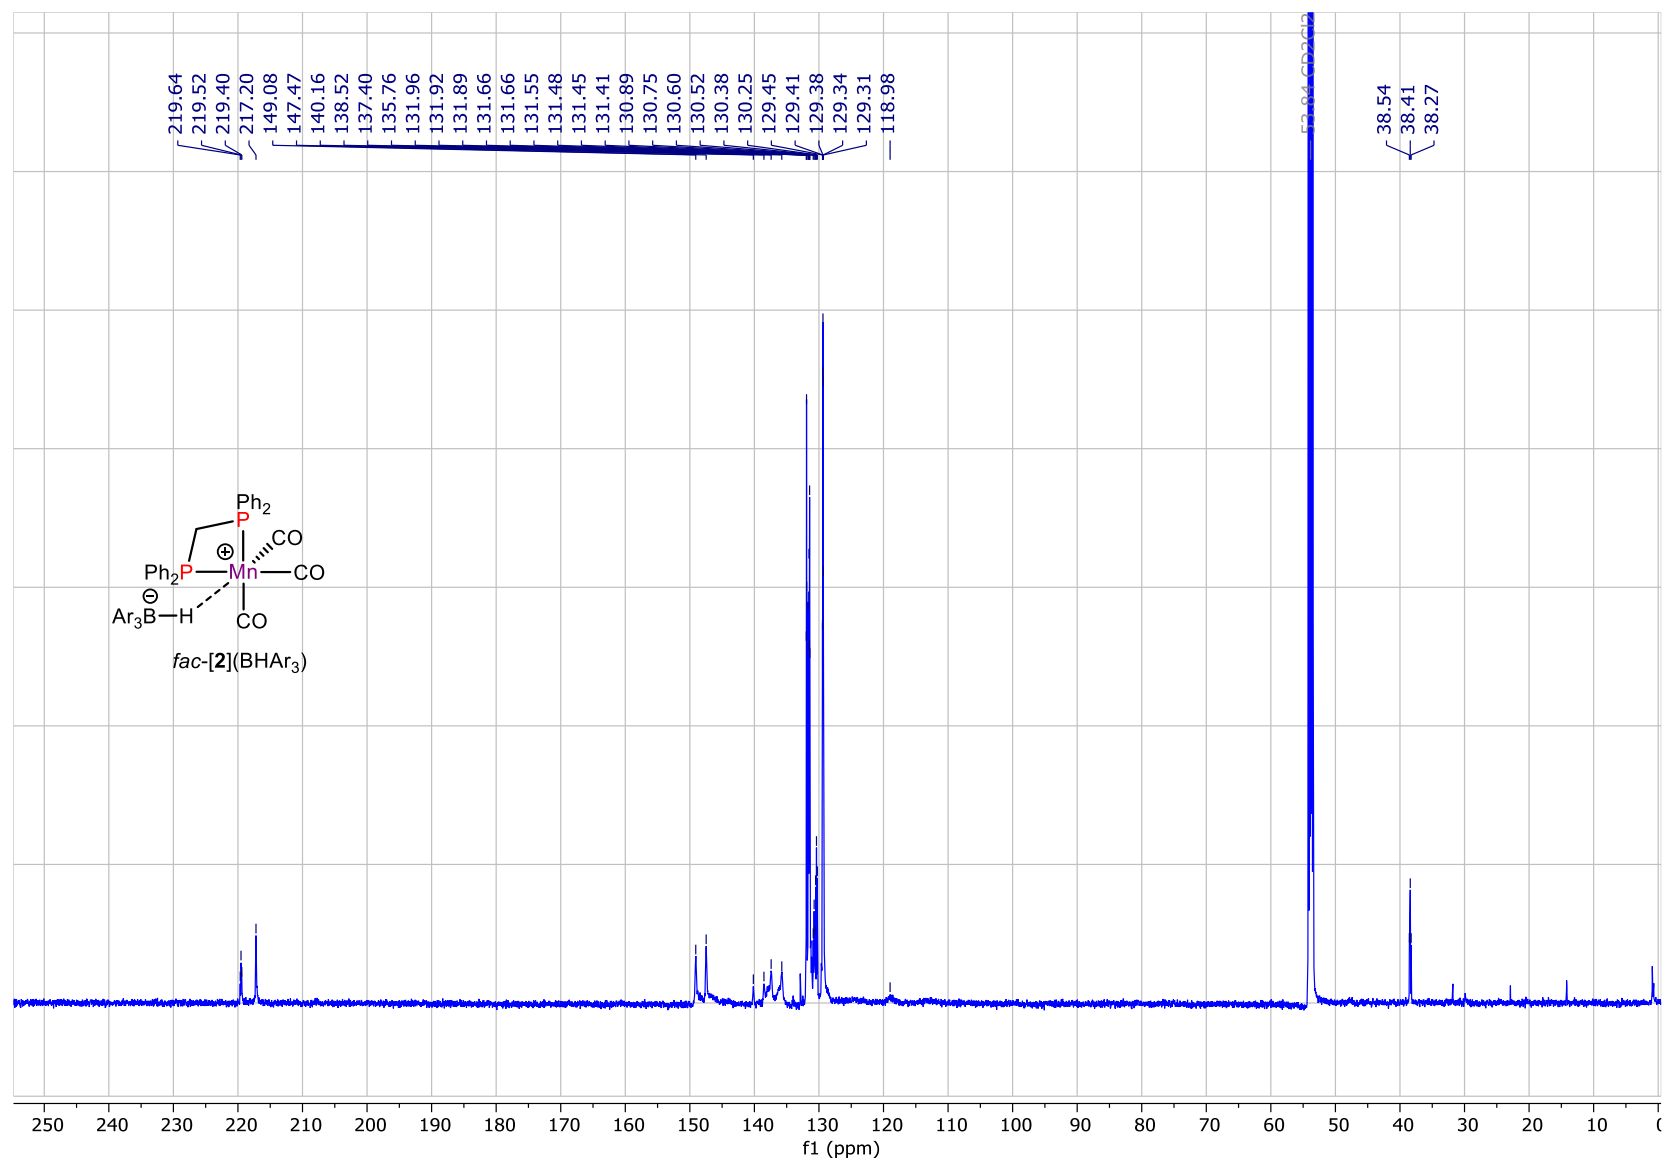

**Figure S34.**  $^{13}\text{C}\{^1\text{H}\}$  NMR spectrum of complex *fac*-[2](BAr<sub>3</sub>) (150.9 MHz, CD<sub>2</sub>Cl<sub>2</sub>, 253 K).

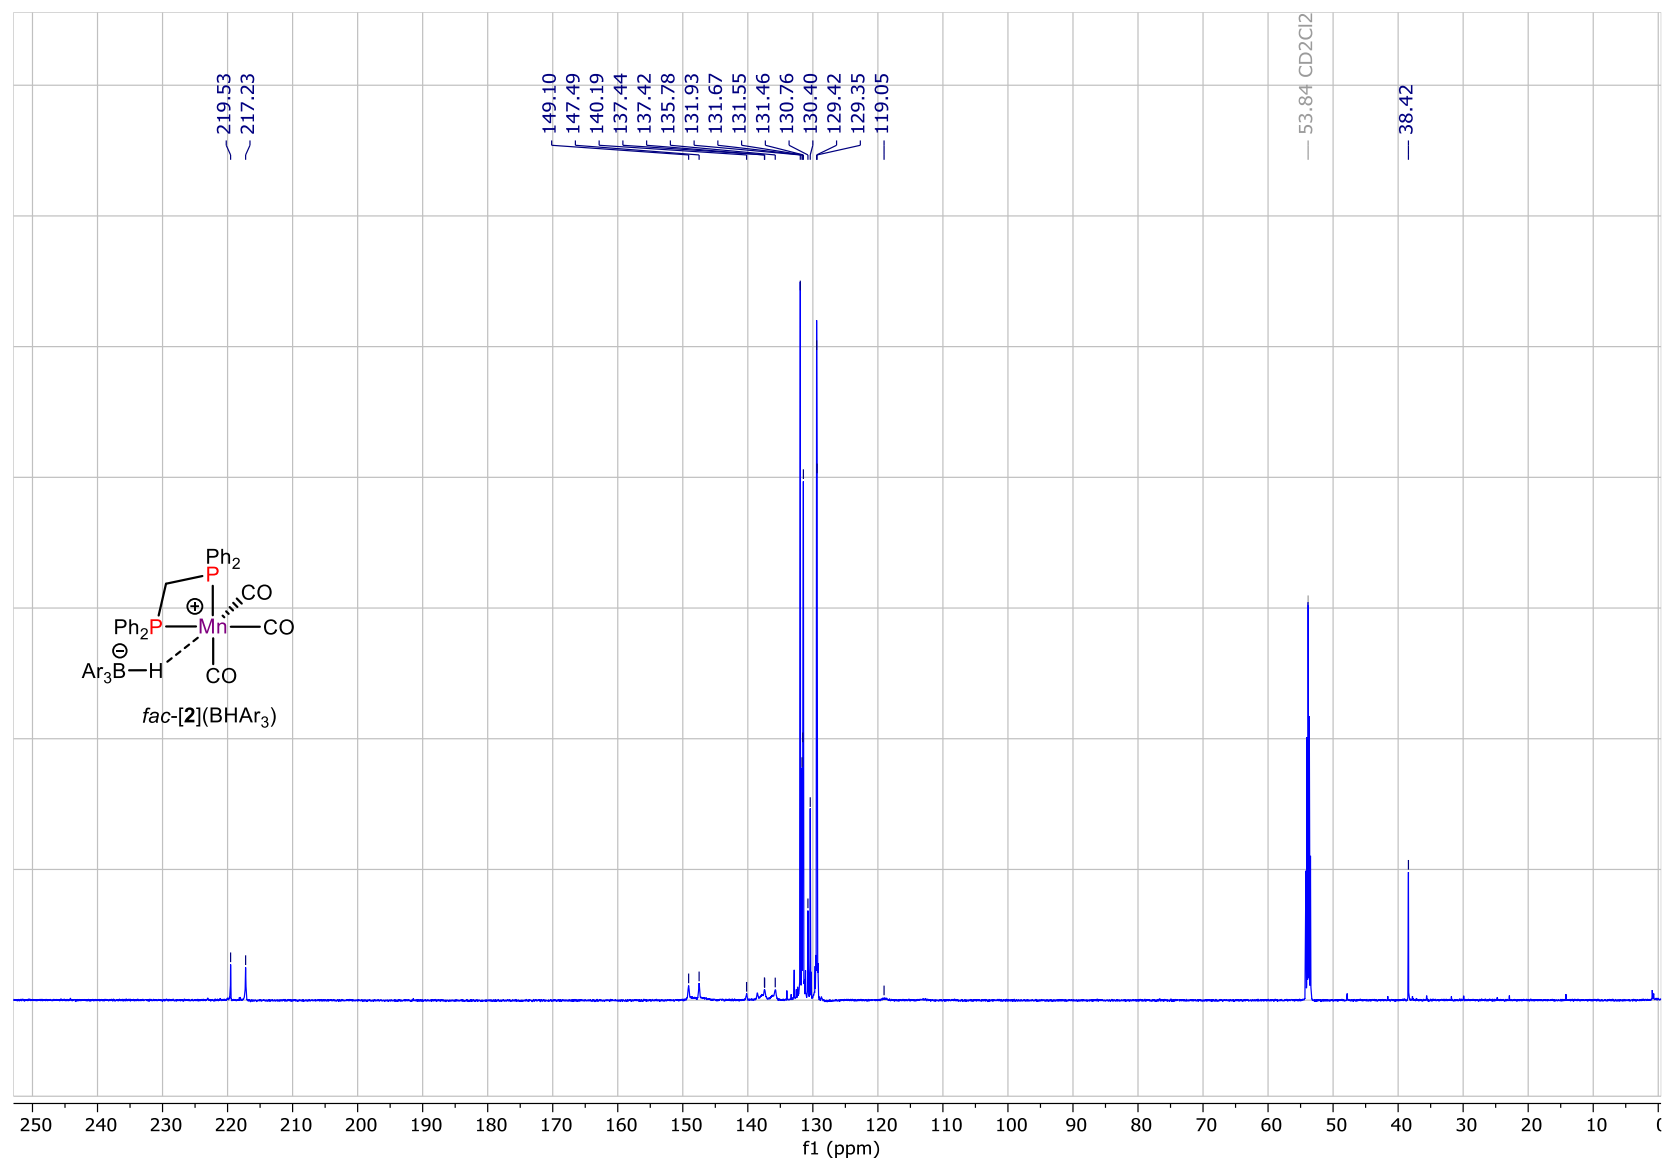

**Figure S35.** <sup>13</sup>C{<sup>1</sup>H, <sup>31</sup>P} NMR spectrum of complex *fac*-[2](BHA<sub>r3</sub>) (150.9 MHz, CD<sub>2</sub>Cl<sub>2</sub>, 253 K).

## DFT calculations.

Structures of reactants and complexes were optimized at the  $\omega$ B97-XD level<sup>4</sup> applying def2-TZVP basis set<sup>5</sup> by Gaussian 09.<sup>6</sup> Optimizations were done in  $\text{CH}_2\text{Cl}_2$  introduced by SMD solvent model.<sup>7</sup> Infrared frequencies were scaled by a factor 0.950.<sup>8</sup> Manganese hydride complex  $(\text{dppm})\text{Mn}(\text{CO})_3\text{H}$  (**1**) has two minima on PES having facial and meridional arrangement of three carbonyl groups (Figure S36). At that *fac*-**1** has *syn*-arrangement of  $\text{CH}_2$ -bridge of dppm-ligand respective to the hydride ligand, the minima corresponding to the *anti-fac*-**1** isomer was not revealed.

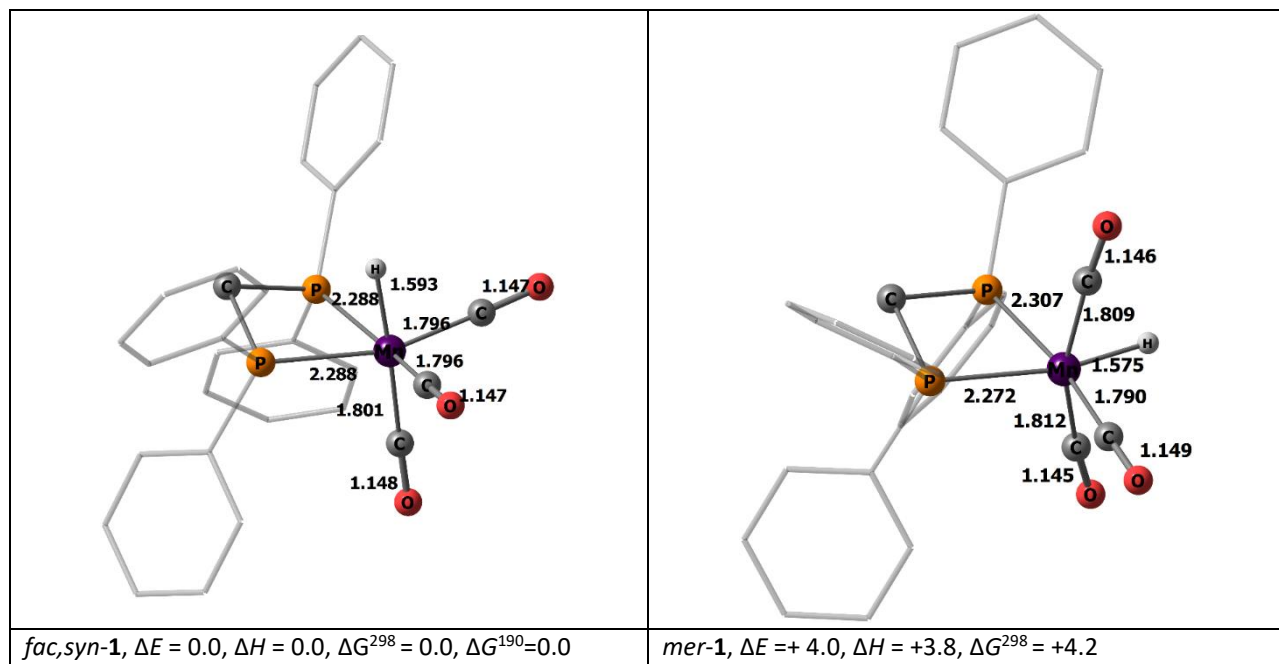

**Figure S36.** Optimized structures of two isomers for Mn(I) hydride complex  $(\text{dppm})\text{Mn}(\text{CO})_3\text{H}$  (**1**). Hydrogen atoms except hydride are removed for clarity and phenyl rings are shown as a wireframe. Energies in kcal/mol are relative to *fac*-**1**.

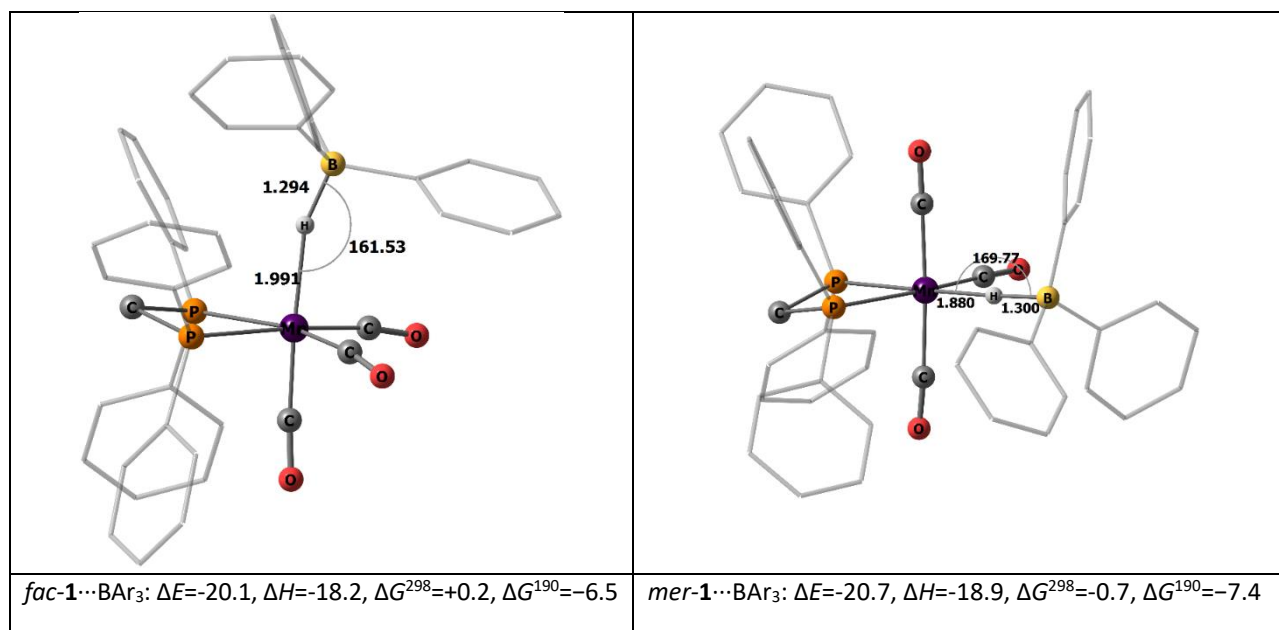

**Figure S37.** Optimized structures of the possible isomers of **1**... $\text{BAR}_3$  complexes. Hydrogens (except hydride) and fluorine removed, phenyl carbons shown as a wireframe. Energies in kcal/mol are relative to *fac*-**1** and free  $\text{BAR}_3$ .

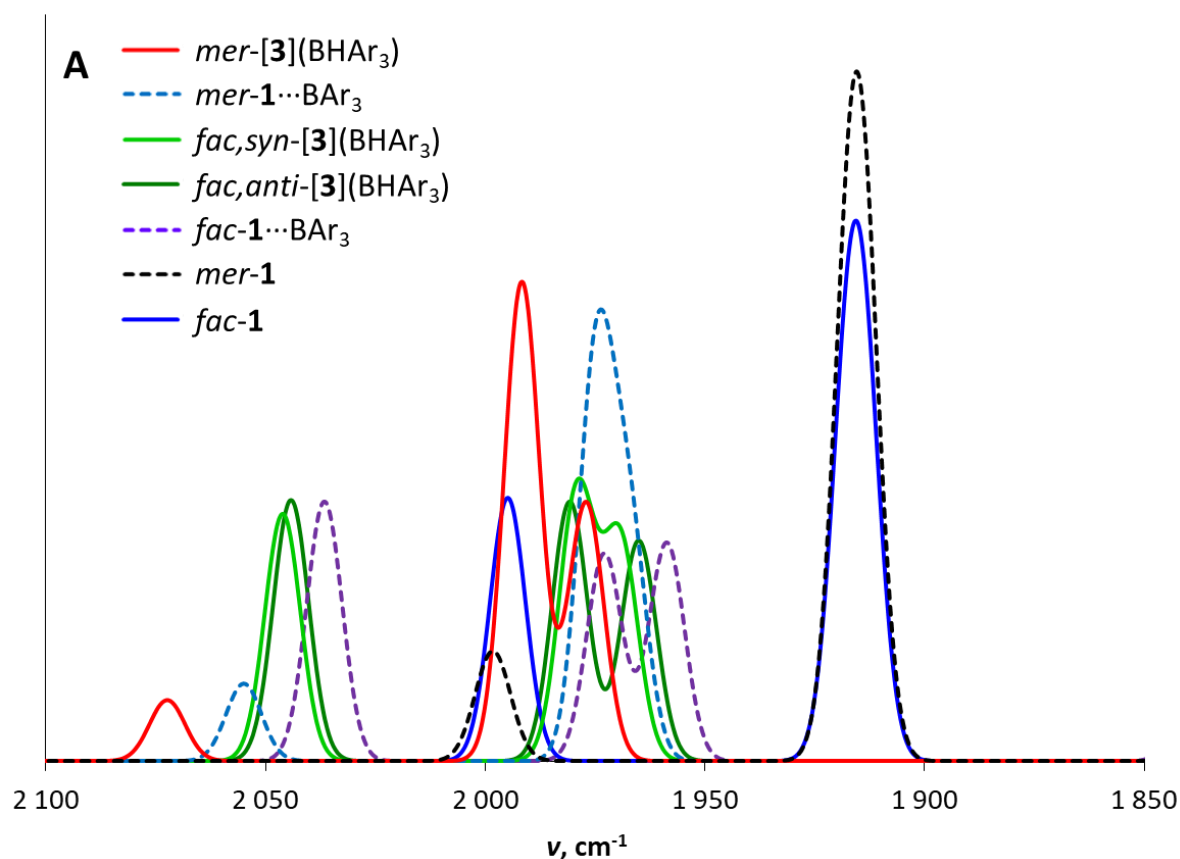

**Figure S38.** Simulated IR spectra for isomers of hydride **1**, their adducts with  $\text{BAr}_3$  and cations  $[\mathbf{3}](\text{BAr}_3)$ . Frequencies scales by 0.950, FWHH set to 9.5.

The frequency analysis for **1**, **3** and  $[\text{mer-1}]\cdots\text{BAr}_3$  adducts shows that vibrations which are higher than  $\nu(\text{CO})$  of facial cation **3** is unambiguously belongs to the meridional isomers.

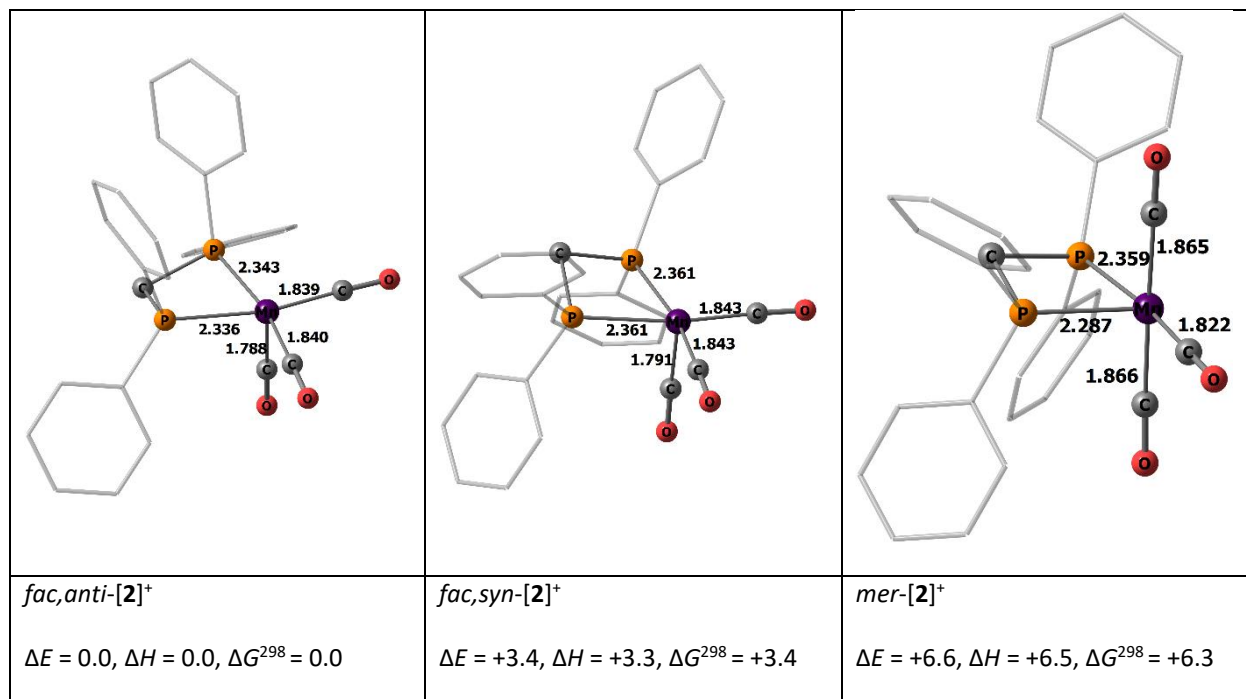

**Figure S39.** Optimized structures of non-stabilized  $[(\text{dppm})\text{Mn}(\text{CO})_3]^+$  cations **[2]**<sup>+</sup> with key geometric parameters. Hydrogens are removed, phenyl carbons shown as a wireframe. Energies in kcal/mol are relative to most stable *fac,anti*-**2**<sup>+</sup>.



The *fac,anti*-[3]<sup>+</sup> and *fac,syn*-[2]<sup>+</sup> cations retain C<sub>s</sub> symmetry of the parent facial hydride (Mn-P distances differs by <0.01 Å), while difference of Mn-P bonds is 0.072 Å for *mer*-[2]<sup>+</sup> isomer. Due to non-planarity of MnPCP cycle two “apical” CO groups becomes non-equivalent.

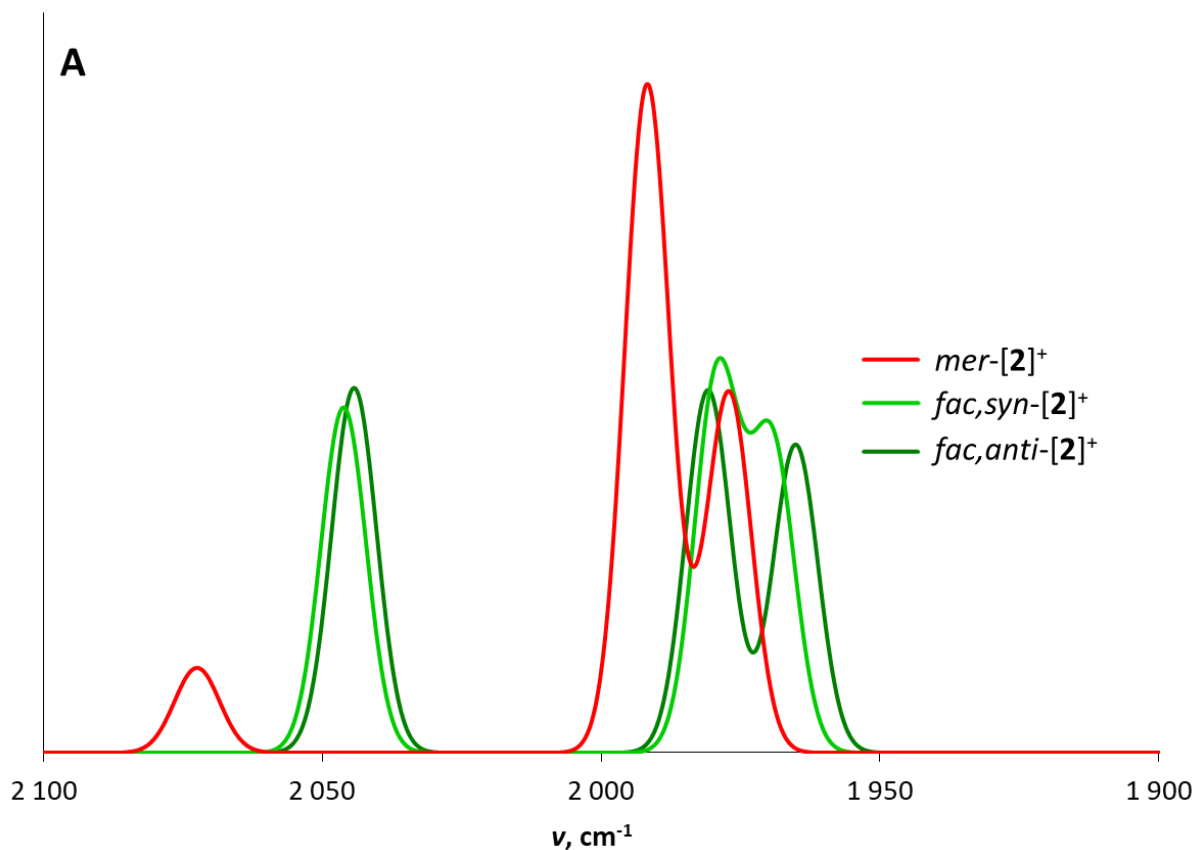

**Figure S40.** Simulated IR spectra for isomers of complex [(dppm)Mn(CO)<sub>3</sub>]<sup>+</sup> [2]<sup>+</sup>. Frequencies scales by 0.950, FWHH set to 9.5.

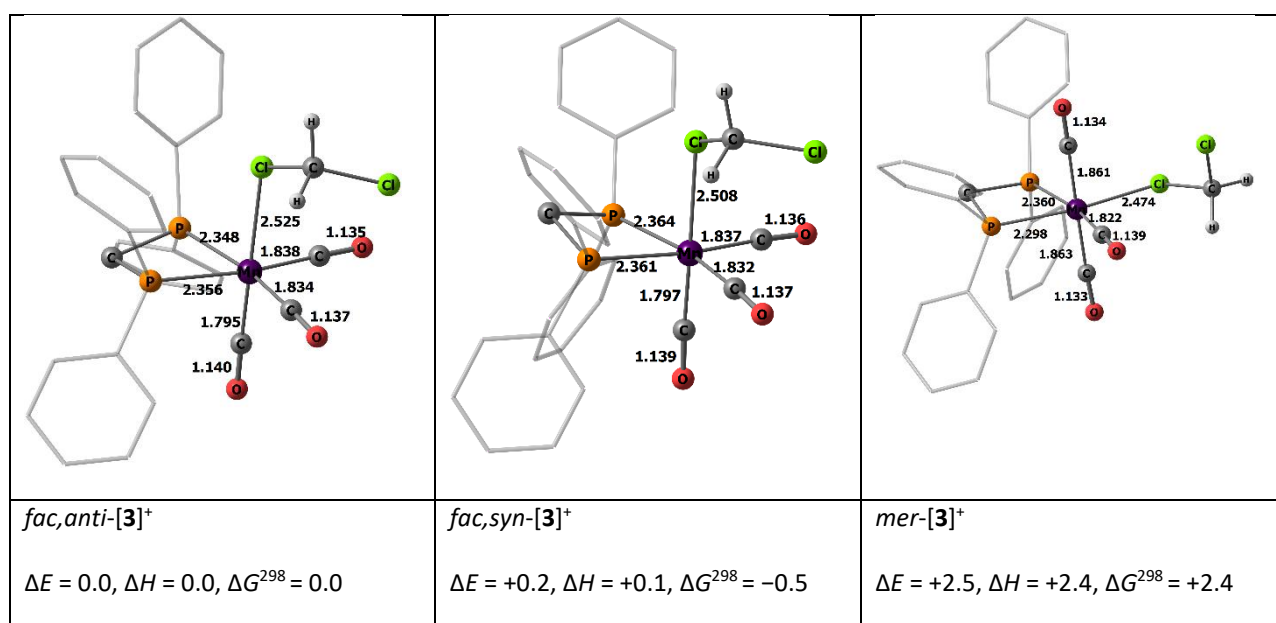

**Figure S41.** Optimized structures of *fac*-[(dppm)Mn(CO)<sub>3</sub>(κ<sup>1</sup>Cl-CH<sub>2</sub>Cl<sub>2</sub>)](BAR<sub>4</sub>) ([3]<sup>+</sup>) with key geometric parameters. Hydrogens except those of CH<sub>2</sub>Cl<sub>2</sub> are removed, phenyl carbons are shown as a wireframe. Energies in kcal/mol are relative to the *fac,anti*-[3]<sup>+</sup> isomer.

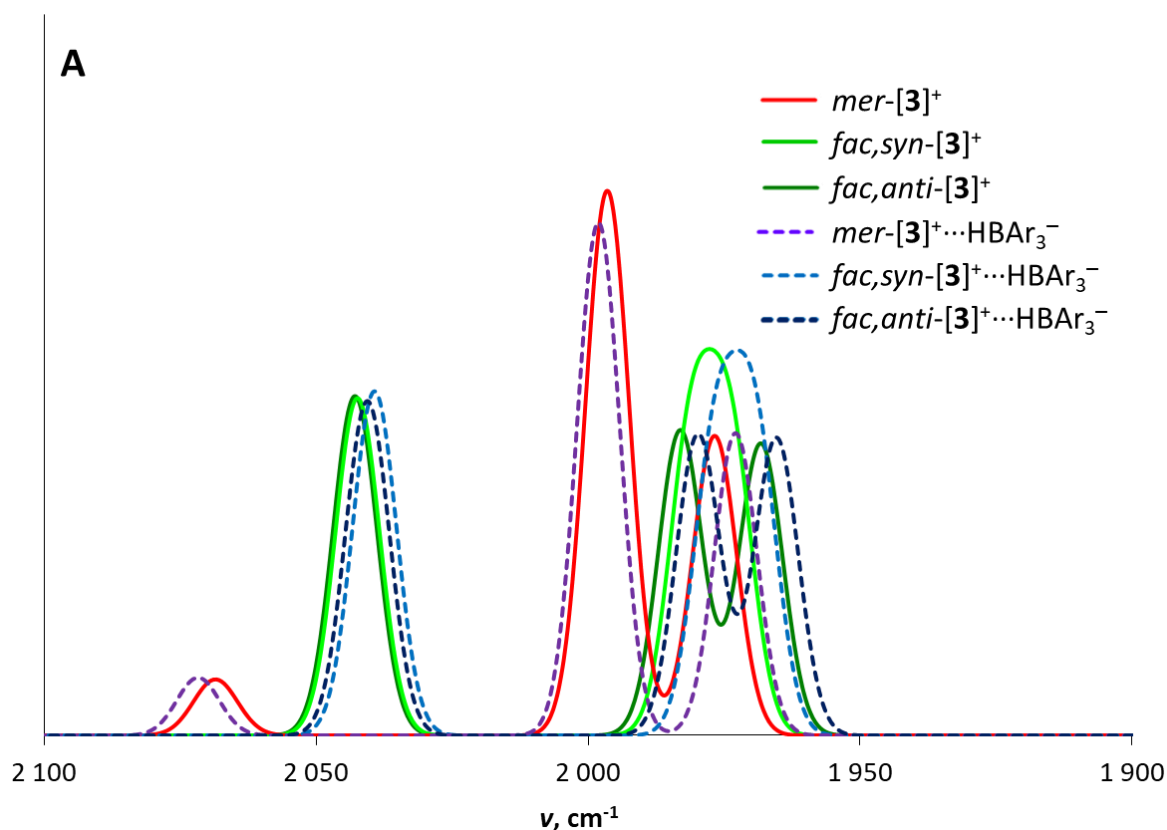

**Figure S42.** Comparison of simulated IR spectra for cationic complexes with coordinated  $\text{CH}_2\text{Cl}_2$   $[\mathbf{3}]^+$  vs. their ion pairs  $[\mathbf{3}](\text{BAr}_3)$ . Frequencies scales by 0.950, FWHH set to 9.5.

Specific  $\text{CH}_2\text{Cl}_2$  solvation significantly changes the energetic pattern of cationic complexes. The most favored isomer at this conditions being the *fac,syn*-one (in the Gibbs energy scale). Notably the relative preference of *syn*- and *anti*-isomers are clearly depending on the coordination of Mn atom – if covalent bond is formed – in hydride or bromide – only *syn*-form could be found, when the coordination site is fully opened – in the free cation – the *anti*-isomer is strongly preferred.  $\text{CH}_2\text{Cl}_2$  complexes occupy the intermediate position in this row and in this case *fac,syn*- and *fac,anti*-isomers become almost isoergic.

Another notable result is a unfavorable character of *fac,anti*- $[(\text{dppm})\text{Mn}(\text{CO})_3(\kappa^1\text{Cl}-\text{CH}_2\text{Cl}_2)](\text{BAr}_4)$  (*fac,anti*- $[\mathbf{3}]^+$ ) complex formation in the Gibbs energy scale, even at 190 K. It should be noted that  $\Delta G = +2 \div +3$  kcal/mol still allow *ca.* 10% of  $\text{CH}_2\text{Cl}_2$  complex when using  $\text{CH}_2\text{Cl}_2$  as a solvent due to the concentration shift of the equilibrium. Therefore we could suggest that formed as a result of hydride transfer *mer*- $[\mathbf{2}]^+$  cation at low temperatures readily coordinates  $\text{CH}_2\text{Cl}_2$  molecule to form *mer*- $[(\text{dppm})\text{Mn}(\text{CO})_3(\kappa^1\text{Cl}-\text{CH}_2\text{Cl}_2)](\text{BAr}_4)$  (*mer*- $[\mathbf{3}]^+$ ) solvate. The isomerization to the preferred *fac,syn*- $[\mathbf{3}]^+$  complex could proceeds both directly via dissociation to the free  $[\mathbf{2}]^+$  cation. At the higher temperatures  $\text{CH}_2\text{Cl}_2$  complexes are tend to dissociate with the further isomerization to the thermodynamic product *fac,anti*- $[\mathbf{3}]^+$ .

**Table S2.** Energies of  $\text{CH}_2\text{Cl}_2$  complexes formation for  $[\mathbf{3}]^+$  ( $[\mathbf{2}]^+ + \text{CH}_2\text{Cl}_2 \rightarrow [\mathbf{3}]^+$ ).

|                  | <i>fac,anti</i> - $[\mathbf{3}]^+$ | <i>fac,syn</i> - $[\mathbf{3}]^+$ | <i>mer</i> - $[\mathbf{3}]^+$ |
|------------------|------------------------------------|-----------------------------------|-------------------------------|
| $\Delta E$       | -7.5                               | -10.6                             | -11.6                         |
| $\Delta H$       | -5.8                               | -9.0                              | -9.9                          |
| $\Delta G^{298}$ | 6.8                                | 2.9                               | 3.0                           |
| $\Delta G^{190}$ | 2.2                                | -1.5                              | -1.7                          |

**Table S3.** Calculated  $\nu_{\text{CO}}$  frequencies (scaled by factor 0.95) and intensities for Mn(I) complexes **1**, **[2]<sup>+</sup>** and **[3]<sup>+</sup>** and **[3](BAr<sub>3</sub>)**

| Complex                               | (dppm)Mn(CO) <sub>3</sub> H<br><b>1<sup>H</sup></b> |                 | (dppm)Mn(CO) <sub>3</sub> H...BAr <sub>3</sub><br><b>1<sup>H</sup>...BAr<sub>3</sub></b> |                 | [(dppm)Mn(CO) <sub>3</sub> ] <sup>+</sup><br><b>[2]<sup>+</sup></b> |                 |                  | [(dppm)Mn(CO) <sub>3</sub> (CH <sub>2</sub> Cl <sub>2</sub> )] <sup>+</sup><br><b>[3]<sup>+</sup></b> |                 |                  | [(dppm)Mn(CO) <sub>3</sub> (CH <sub>2</sub> Cl <sub>2</sub> )] <sup>+</sup> ...[HBAr <sub>3</sub> ] <sup>-</sup><br><b>[3](BAr<sub>3</sub>)</b> |                 |                  |
|---------------------------------------|-----------------------------------------------------|-----------------|------------------------------------------------------------------------------------------|-----------------|---------------------------------------------------------------------|-----------------|------------------|-------------------------------------------------------------------------------------------------------|-----------------|------------------|-------------------------------------------------------------------------------------------------------------------------------------------------|-----------------|------------------|
|                                       | <i>mer-</i>                                         | <i>fac,syn-</i> | <i>mer-</i>                                                                              | <i>fac,syn-</i> | <i>mer-</i>                                                         | <i>fac,syn-</i> | <i>fac,anti-</i> | <i>mer-</i>                                                                                           | <i>fac,syn-</i> | <i>fac,anti-</i> | <i>mer-</i>                                                                                                                                     | <i>fac,syn-</i> | <i>fac,anti-</i> |
| $\nu_{\text{CO1}}$ , cm <sup>-1</sup> | 1914                                                | 1914            | 1968                                                                                     | 1959            | 1978                                                                | 1970            | 1966             | 1977                                                                                                  | 1974            | 1969             | 1974                                                                                                                                            | 1970            | 1966             |
| $A_{\text{CO1}}$ , km/mol             | 2215                                                | 1901            | 1366                                                                                     | 1317            | 1560                                                                | 1331            | 1331             | 1330                                                                                                  | 1276            | 1297             | 1343                                                                                                                                            | 1313            | 1322             |
| $\nu_{\text{CO2}}$ , cm <sup>-1</sup> | 1918                                                | 1918            | 1975                                                                                     | 1974            | 1992                                                                | 1980            | 1982             | 1997                                                                                                  | 1982            | 1984             | 1999                                                                                                                                            | 1977            | 1980             |
| $A_{\text{CO2}}$ , km/mol             | 2338                                                | 1785            | 2417                                                                                     | 1252            | 2889                                                                | 1629            | 1567             | 2418                                                                                                  | 1308            | 1356             | 2278                                                                                                                                            | 1272            | 1338             |
| $\nu_{\text{CO3}}$ , cm <sup>-1</sup> | 1999                                                | 1996            | 2056                                                                                     | 2037            | 2073                                                                | 2047            | 2045             | 2069                                                                                                  | 2043            | 2044             | 2072                                                                                                                                            | 2040            | 2041             |
| $A_{\text{CO3}}$ , km/mol             | 664                                                 | 1588            | 467                                                                                      | 1566            | 368                                                                 | 1495            | 1576             | 249                                                                                                   | 1498            | 1509             | 257                                                                                                                                             | 1527            | 1487             |

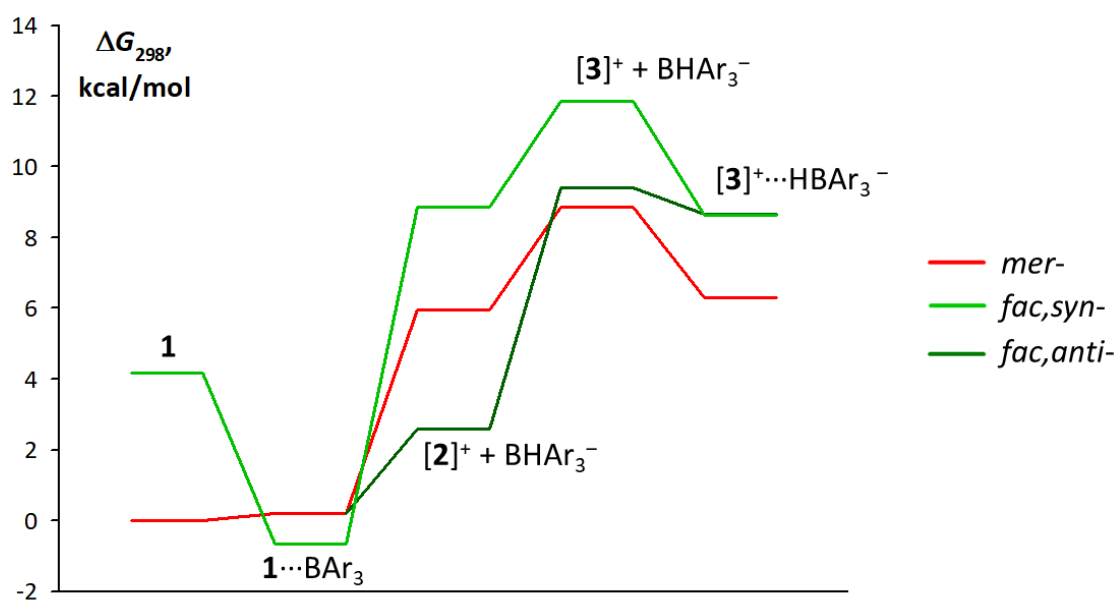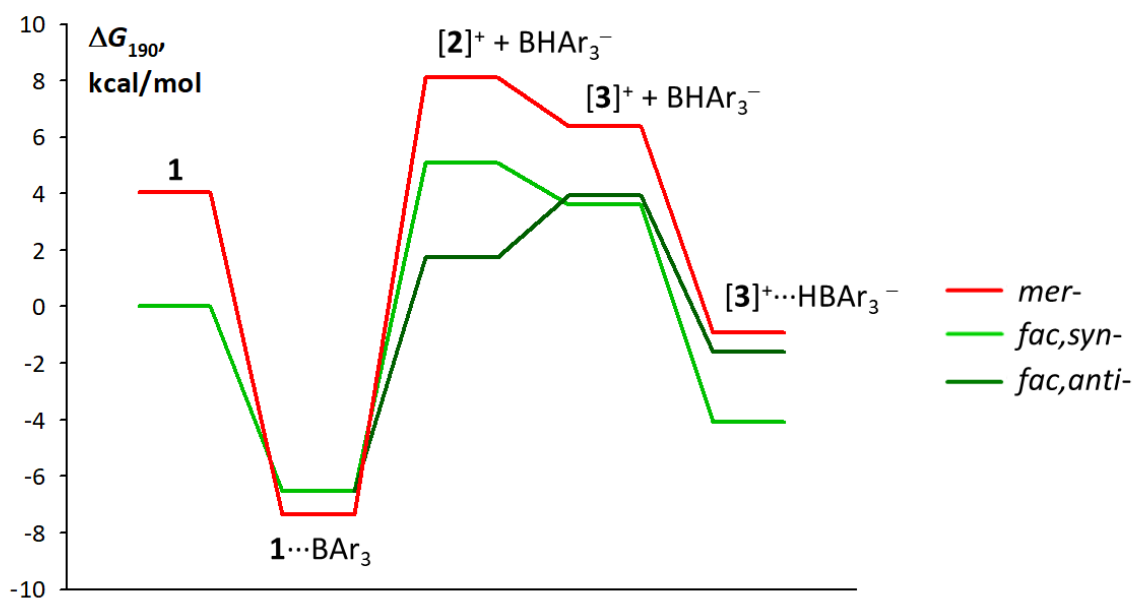

**Figure S43.** Computed (DFT/ $\omega$ B97XD/def2-TZVP/SMD( $\text{CH}_2\text{Cl}_2$ )) Gibbs energy profiles for the *fac*-1 and  $\text{BAr}_3$  reaction at 298 K (top) and 190 K (bottom).

## References

1. N. V. Kireev, O. A. Filippov, E. S. Gulyaeva, E. S. Shubina, L. Vendier, Y. Canac, J.-B. Sortais, N. Lugan and D. A. Valyaev, *Chem. Commun.*, 2020, **56**, 2139.
2. A. Zirakzadeh, S. R. M. M. de Aguiar, B. Stöger, M. Widhalm and K. Kirchner, *ChemCatChem*, 2017, **9**, 1744.
3. G. R. Fulmer, A. J. M. Miller, N. H. Sherden, H. E. Gottlieb, A. Nudelman, B. M. Stoltz, J. E. Bercaw and K. I. Goldberg, *Organometallics*, 2010, **29**, 2176.
4. J.-D. Chai and M. Head-Gordon, *Phys. Chem. Chem. Phys.*, 2008, **10**, 6615.
5. F. Weigend and R. Ahlrichs, *Phys. Chem. Chem. Phys.*, 2005, **7**, 3297.
6. Gaussian 09, Revision D.01, M. J. Frisch, G. W. Trucks, H. B. Schlegel, G. E. Scuseria, M. A. Robb, J. R. Cheeseman, G. Scalmani, V. Barone, G. A. Petersson, H. Nakatsuji, X. Li, M. Caricato, A. Marenich, J. Bloino, B. G. Janesko, R. Gomperts, B. Mennucci, H. P. Hratchian, J. V. Ortiz, A. F. Izmaylov, J. L. Sonnenberg, D. Williams-Young, F. Ding, F. Lipparini, F. Egidi, J. Goings, B. Peng, A. Petrone, T. Henderson, D. Ranasinghe, V. G. Zakrzewski, J. Gao, N. Rega, G. Zheng, W. Liang, M. Hada, M. Ehara, K. Toyota, R. Fukuda, J. Hasegawa, M. Ishida, T. Nakajima, Y. Honda, O. Kitao, H. Nakai, T. Vreven, K. Throssell, J. A. Montgomery, Jr., J. E. Peralta, F. Ogliaro, M. Bearpark, J. J. Heyd, E. Brothers, K. N. Kudin, V. N. Staroverov, T. Keith, R. Kobayashi, J. Normand, K. Raghavachari, A. Rendell, J. C. Burant, S. S. Iyengar, J. Tomasi, M. Cossi, J. M. Millam, M. Klene, C. Adamo, R. Cammi, J. W. Ochterski, R. L. Martin, K. Morokuma, O. Farkas, J. B. Foresman, and D. J. Fox, Gaussian, Inc., Wallingford CT, 2016.
7. A. V. Marenich, C. J. Cramer, D. G. Truhlar, *J. Phys. Chem. B*, 2009, **113**, 6378.
8. I. M. Alecu, J. Zheng, Y. Zhao, D. G. Truhlar, *J. Chem. Theory Comput.*, 2010, **6**, 2872-2887.
